# Supplementary material for: Supplementing Genistein for Breeder Hens Alters the Fatty Acid Metabolism and Growth Performance of Offsprings by Epigenetic Modification
Source: Oxid Med Cell Longev. 2019 Mar 26;2019:9214209. doi: 10.1155/2019/9214209 (PMC6458848; doi:10.1155/2019/9214209)
Supplement: Supplementary 7 — Table 5: the different expressed genes between the CON and GEN groups. [file 9214209.f7.xlsx]

## Sheet: sheet 1
Supplementary Table 5. The different expressed genes between CON and GEN groups
gene	locus	value_CON	value_GEN	log2(fold_change)	p_value	q_value
ENSGALG00000028371	1:100348482-100348552	21437	2785.33	-2.94418	0.00025	0.00183995
ENSGALG00000025794	AADN03022685.1:979-1102	613.691	111.953	-2.45462	0.0005	0.00306562
ENSGALG00000027503	LGE64:168864-182588	2.77081	0.62135	-2.15683	5e-05	0.000514991
MYH1E	18:473712-638720	1.0948	0.252879	-2.11414	0.00145	0.00658988
MYL1	7:2739203-2756780	1.72498	0.454716	-1.92354	0.00235	0.00938393
ENSGALG00000026592	1:100373555-100373705	7552.53	2006.3	-1.91242	5e-05	0.000514991
H2A-VIII	1:48026877-48027267	18.6344	5.33687	-1.8039	0.001	0.00507385
ABCA12	7:4209984-4288793	0.964717	0.290135	-1.73338	5e-05	0.000514991
ENSGALG00000000443	25:205887-214237	26.4382	8.55724	-1.62741	5e-05	0.000514991
ENSGALG00000027955	16:389808-394217	2.69635	0.978068	-1.463	5e-05	0.000514991
EF1A	20:9348413-9360272	1.03287	0.37997	-1.4427	0.00745	0.021635
ENSGALG00000000187	27:27257-43145	0.7975	0.299839	-1.41129	0.0066	0.0197966
SLC4A10	7:20678065-20774184	5.46905	2.44981	-1.15862	5e-05	0.000514991
ENSGALG00000023925	6:16117860-16121379	53.9221	26.8943	-1.00358	5e-05	0.000514991
ENSGALG00000026538	AADN03011151.1:20-1070	26.2223	13.1353	-0.997345	0.0103	0.0271567
ENSGALG00000008598	5:23913049-23920027	3.87587	2.02145	-0.939129	0.00835	0.0234499
ENSGALG00000028241	7:27923855-27925184	8.65072	4.59624	-0.912366	0.0071	0.0208992
ENSGALG00000027839	AADN03015723.1:53-2600	4.17438	2.28242	-0.870997	0.0024	0.00953469
ENSGALG00000005148	2:936145-964349	8.92811	4.9194	-0.859872	5e-05	0.000514991
TSKU	1:192620178-192621237	19.9345	11.1521	-0.837949	0.00025	0.00183995
PPARGC1A	4:73626291-73691855	3.2435	1.84044	-0.817503	0.00045	0.00284262
SLC16A5	18:10913950-10921921	16.719	9.5371	-0.80987	0.0003	0.00210198
ST6GALNAC2	18:4283803-4289327	7.01822	4.14603	-0.759377	0.01305	0.0322045
NRG2	13:687900-839733	3.47287	2.06858	-0.747491	0.01195	0.0301982
IRS2	1:137992923-137995864	6.88804	4.14417	-0.733011	0.006	0.0185005
ENSGALG00000026697	JH376350.1:4512-6872	10.6143	6.44719	-0.719268	0.00655	0.0197074
hairy1	21:2803580-2805434	51.8488	31.8058	-0.705019	0.00065	0.0036944
COQ10B	7:9709226-9719149	18.9089	11.8621	-0.672708	0.0031	0.0114401
ENSGALG00000005469	6:16127454-16132383	64.0627	40.2793	-0.669446	0.01385	0.0336246
ULK2	19:6807396-6843139	91.8361	59.8569	-0.617543	0.0114	0.0291489
C2H18ORF1	2:96516593-96527721	106.429	70.0804	-0.602803	0.0037	0.0130012
DBI	7:27884290-27887633	557.62	721.322	0.371362	0.05125	0.0899204
LFABP	4:85503586-85507317	1296.73	1869.7	0.527931	0.03435	0.0663373
LEMD2	26:4523993-4535399	8.71114	13.0683	0.585135	0.0026	0.0101126
TFG	1:84368982-84385061	20.9108	31.3709	0.585184	0.00225	0.00907145
CDV3	2:43218169-43221775	21.2021	31.8108	0.585309	0.004	0.0137371
IFIH1	7:20543410-20570333	10.7671	16.1547	0.585321	0.0027	0.0103805
SLC35D1	8:27518469-27525969	26.6972	40.0617	0.585535	0.00145	0.00658988
SLC5A3	1:105043716-105046426	31.4038	47.1258	0.585578	0.0015	0.00677756
EXOSC9	4:53358778-53364025	10.9978	16.5037	0.585583	0.00465	0.0152776
TRIP4	10:685887-714192	5.67374	8.51485	0.585681	0.00645	0.0194918
PTPRJ	5:12238925-12267404	12.9749	19.4723	0.585696	0.0032	0.0117129
ARSB	Z:22361254-22427489	11.9182	17.8883	0.585849	0.00255	0.00998123
CRELD1	12:11478290-11490436	42.5968	63.9436	0.586057	0.0017	0.00741449
ZNF318	3:30366352-30390590	4.50042	6.75595	0.5861	0.00195	0.0081693
RPAP1	5:24139476-24176035	3.97898	5.97332	0.586134	0.00205	0.00849982
IGF-I	10:16180773-16320955	13.1893	19.8011	0.58622	0.00095	0.00489457
MCL1	25:1511201-1516430	63.4123	95.2014	0.58622	0.002	0.00835181
AP3M2	22:2697934-2706663	19.1996	28.8261	0.586296	0.00155	0.00694705
TMEM94	18:11066352-11104219	9.91569	14.889	0.586459	0.0013	0.00609065
SH3KBP1	1:119398187-119620052	13.146	19.7398	0.586477	0.00135	0.00627457
TATDN1	2:138058218-138071047	7.55162	11.3402	0.586592	0.01805	0.0411123
REL	3:2009614-2043559	3.51609	5.28018	0.586613	0.004	0.0137371
GTF3C1	14:11933144-11971195	6.20302	9.31613	0.58676	0.0016	0.00708415
SLC30A9	4:67941416-67964769	11.0774	16.6368	0.586765	0.00255	0.00998123
FUBP3	17:5911622-5947740	25.5641	38.3943	0.58677	0.0016	0.00708415
DDX6	24:5574123-5587498	12.5081	18.7869	0.586862	0.00095	0.00489457
ARID5B	6:7726201-7822139	5.5418	8.32458	0.587023	0.00205	0.00849982
SLC2A10	20:5928110-5935198	7.54075	11.3279	0.587095	0.0132	0.0324923
PSMB7	17:9374896-9394545	163.071	244.978	0.587154	0.00205	0.00849982
SLC12A2	Z:56515929-56567793	5.41218	8.13092	0.587209	0.00235	0.00938393
CRIM1	3:31632108-31793597	6.46952	9.7203	0.587341	0.00245	0.00969048
RNF38	Z:51729347-51813091	7.81472	11.7422	0.587433	0.0083	0.0233769
PSMA4	10:3146801-3151679	35.1294	52.7885	0.587543	0.0019	0.00801155
RPS6KA5	5:43383873-43451410	2.8073	4.21923	0.587798	0.0022	0.00893153
NUDT5	1:6184286-6193751	345.866	519.832	0.587833	0.00445	0.0147995
FLAD1	25:1284085-1286863	10.0452	15.0981	0.587869	0.0079	0.0226212
SPPL2B	28:564383-599425	12.0424	18.1012	0.587959	0.00165	0.00724511
NBEAL1	7:13190343-13266973	9.05811	13.6161	0.588027	0.0028	0.0106562
ARFRP1	20:9977365-9988352	6.94261	10.4362	0.588042	0.00455	0.0150635
NFATC3	11:2799113-2841716	7.34605	11.0427	0.588054	0.0014	0.0064302
CENPT	11:861023-877706	4.18405	6.28959	0.588064	0.0123	0.0309154
ENSGALG00000006296	1:104788132-104811097	30.403	45.7028	0.588068	0.00125	0.00591812
ENSGALG00000013313	AADN03024004.1:20-11301	17.5513	26.3875	0.588276	0.00245	0.00969048
ENSGALG00000013851	15:6740058-6786099	4.41658	6.64073	0.588412	0.0023	0.00921262
GANC	5:24915660-24936853	10.9456	16.4585	0.588489	0.0019	0.00801155
MAGOH2	8:23550023-23551699	59.6459	89.6896	0.588517	0.0019	0.00801155
PLXNB2	1:20283171-20512301	19.5888	29.4564	0.58855	0.00385	0.0133674
USP6NL	1:5900536-6010810	3.8396	5.77399	0.588611	0.00305	0.0113128
ARMC6	28:3427629-3431577	12.4333	18.6989	0.588741	0.003	0.0111877
TWF1	1:30035148-30044630	7.08915	10.6628	0.588895	0.014	0.0338902
MGP	1:47886139-47891373	126.948	190.946	0.588926	0.00205	0.00849982
MYH11	14:7557637-7614129	25.5051	38.3664	0.589055	0.00415	0.0141194
DENND6A	12:8722033-8741878	4.86634	7.32053	0.589111	0.00345	0.0123532
FBRSL1	15:1547557-1855522	5.38971	8.10796	0.589131	0.00355	0.0125916
ADD3	6:25264734-25352280	10.766	16.1962	0.589167	0.0058	0.0180266
PDSS1	2:15977930-15999697	13.5624	20.4039	0.589235	0.0049	0.0158318
TICRR	10:12331066-12347214	1.15891	1.74367	0.589365	0.01745	0.0401371
ATP2C1	2:42276961-42316295	14.5134	21.8367	0.58937	0.0013	0.00609065
MAP4K5	5:57691558-57750466	4.26576	6.41866	0.589471	0.00315	0.0115625
GARS	2:4337074-4359285	31.2954	47.091	0.589498	0.00125	0.00591812
SLAIN2	4:66066499-66094716	3.50239	5.27036	0.58956	0.00345	0.0123532
TTLL5	5:37609204-37728665	11.3835	17.1307	0.589644	0.0016	0.00708415
DNAJC7	27:4739048-4758336	11.6756	17.5758	0.590095	0.00115	0.00558968
EMC3	12:2749643-2799644	32.1712	48.4311	0.590164	0.006	0.0185005
ZNF638	JH376303.1:8286-21852	2.68323	4.03958	0.590234	0.0201	0.0446073
FBXL20	27:4124275-4139879	13.0112	19.5897	0.590335	0.0036	0.0127457
OGFR	20:8676629-8684715	8.36534	12.5956	0.590425	0.00965	0.0259287
FAM199X	4:16692235-16700308	5.08378	7.65463	0.590432	0.0148	0.0352928
ELMOD2	4:29161355-29167691	16.8312	25.3439	0.590498	0.00315	0.0115625
TOLLIP	5:14042658-14067726	15.9375	23.9996	0.590585	0.0013	0.00609065
PLCL2	2:35030728-35122053	1.87169	2.81876	0.590719	0.01075	0.0279831
IAP3	4:15612769-15632841	19.2697	29.0208	0.590754	0.0024	0.00953469
PHF12	19:5882262-5911315	10.5333	15.864	0.5908	0.0018	0.00770675
SEMA7A	10:2032640-2055582	4.01715	6.05055	0.590895	0.0042	0.014248
LARS2	2:43475366-43560197	6.70871	10.1052	0.590985	0.0026	0.0101126
RPS19BP1	1:50448546-50450694	12.6998	19.1294	0.590987	0.0049	0.0158318
ENSGALG00000006256	4:4214209-4248185	4.66904	7.03318	0.59105	0.00425	0.0143593
ip3ka	5:23959881-23993960	19.4133	29.2432	0.591058	0.00125	0.00591812
IKBKAP	Z:70375293-70406517	20.1685	30.381	0.591064	0.00165	0.00724511
ENSGALG00000001369	26:3092511-3095075	98.2693	148.035	0.591125	0.0014	0.0064302
ITPRIP	6:23801102-23802752	6.2693	9.44425	0.591133	0.0107	0.0278902
TCTN2	15:4924303-4932839	5.0356	7.5863	0.591232	0.01085	0.0281368
ENSGALG00000011528	5:50331640-50371943	3.48096	5.24442	0.591298	0.00365	0.0128603
NDUFS5	23:5287780-5289451	67.0895	101.079	0.59132	0.00155	0.00694705
CASP2	1:77150673-77176640	4.93514	7.43568	0.591373	0.00355	0.0125916
HEXB	Z:24084172-24099681	14.668	22.1047	0.591685	0.00175	0.00756757
NOTCH1	17:7809849-7842342	11.3868	17.1611	0.591779	0.00135	0.00627457
FBF1	18:4579532-4593316	6.11596	9.21747	0.591791	0.00385	0.0133674
TYRO3	5:24215768-24250023	32.2719	48.6375	0.591793	0.0016	0.00708415
KIAA1279	6:10392494-10401275	6.68722	10.0785	0.591808	0.0023	0.00921262
SIRT4	15:9388356-9392584	5.51688	8.31512	0.591884	0.0207	0.0456784
ARMC8	9:14116-74216	4.35836	6.56917	0.591925	0.00485	0.0157356
SPG11	10:19225099-19251639	9.04249	13.6305	0.59205	0.00175	0.00756757
ENSGALG00000026245	AADN03019066.1:504-1005	518.058	780.934	0.592086	0.0016	0.00708415
UGCG	Z:66076173-66103845	1.93196	2.9126	0.59224	0.0097	0.0260092
ZSWIM5	8:19843295-19863938	7.36182	11.0988	0.592263	0.00415	0.0141194
PPFIA1	5:17140751-17191951	9.29453	14.0126	0.592275	0.0013	0.00609065
SOCS1	14:8935373-8936082	21.656	32.6492	0.592282	0.0096	0.0258479
PTGES2	17:5104161-5110262	24.1161	36.3584	0.592291	0.0013	0.00609065
TNFRSF1A	1:78835922-78848886	16.3985	24.7252	0.592419	0.00165	0.00724511
DEDD	25:2169790-2177657	19.791	29.8412	0.592461	0.00205	0.00849982
TCF7L2	6:26590485-26762220	2.60543	3.9286	0.592495	0.00765	0.022084
C20H20ORF43	20:12314418-12334709	43.8084	66.0583	0.592534	0.0108	0.0280819
THRA	27:4342651-4348356	17.5166	26.4132	0.592536	0.00305	0.0113128
XYLT1	14:8067316-8147095	2.3919	3.60685	0.592581	0.01955	0.0436771
PPP1R26	17:7710494-7713122	5.36181	8.08541	0.592602	0.003	0.0111877
UTP4	11:18360465-18365214	4.69797	7.08453	0.592634	0.02255	0.0486038
ENSGALG00000022812	3:108409466-108416996	51.1287	77.1037	0.592666	0.00175	0.00756757
PTPN2	2:96897192-96925921	14.5669	21.9676	0.592682	0.00145	0.00658988
HNRNPA0	13:13799907-13802741	7.83114	11.8097	0.592683	0.00295	0.0110613
SEC24C	6:15500739-15536440	34.1007	51.4348	0.592944	0.00395	0.0136215
DPM2	17:4865440-4867919	11.9155	17.9765	0.593267	0.01355	0.0331721
DISP1	3:17227566-17286101	4.08255	6.15941	0.593322	0.00215	0.00878042
RARRES1	9:21904933-21912426	142.859	215.536	0.59334	0.00325	0.0118588
MYBL2	20:3952513-3969262	4.04086	6.09712	0.593466	0.00275	0.0105311
DST	3:86227689-86545594	1.49633	2.25796	0.593593	0.00195	0.0081693
TSPAN4	5:14631768-14696703	16.3212	24.6306	0.593705	0.0017	0.00741449
RNGTT	3:75254912-75437461	6.68063	10.0821	0.593736	0.00335	0.0121139
MPHOSPH8	1:178467722-178488014	3.24751	4.90109	0.593769	0.00235	0.00938393
PARN	14:791608-826239	4.59466	6.93449	0.593833	0.0036	0.0127457
ARHGDIA	18:10205974-10214784	81.7058	123.323	0.593928	0.00225	0.00907145
IFT122	12:19470636-19496937	6.65011	10.038	0.59402	0.0015	0.00677756
KIF3B	20:10492513-10502873	3.44976	5.20747	0.594088	0.00285	0.0107903
COPE	28:3495158-3499962	60.6963	91.6245	0.594125	0.00155	0.00694705
UPF1	28:3517865-3537861	23.1585	34.9604	0.594183	0.0017	0.00741449
RBM19	15:12452470-12500423	7.76743	11.7259	0.594195	0.00175	0.00756757
KIAA1549	1:56390458-56460409	2.82886	4.27084	0.594296	0.00385	0.0133674
WDR81	19:5380567-5392264	8.71345	13.1564	0.594443	0.0009	0.00469705
EVI5L	AADN03013353.1:1986-11350	8.42851	12.7263	0.594467	0.0135	0.0330843
BCAS3	19:7648488-7950740	7.85298	11.8576	0.594497	0.00155	0.00694705
MAP4K4	1:132936572-133084109	15.4392	23.3149	0.594654	0.0008	0.00432192
RPL21	1:175570305-175577090	107.739	162.698	0.594658	0.00595	0.0183852
FCF1	5:37308072-37313662	7.52833	11.3703	0.594869	0.0034	0.0122304
GDPD5	1:194098030-194256622	30.1979	45.6114	0.594945	0.00145	0.00658988
PTGR2	5:25360138-25374389	7.24757	10.9474	0.595013	0.0015	0.00677756
SHROOM2	1:124420460-124541119	3.9804	6.0127	0.595099	0.00135	0.00627457
SSBP1	1:57489956-57495521	23.1153	34.9183	0.595133	0.0047	0.01539
TRAPPC12	3:93232768-93279701	5.94326	8.97853	0.595226	0.0027	0.0103805
ADPGK	10:1225044-1235745	5.32633	8.04661	0.595239	0.01085	0.0281368
GOLIM4	9:19974183-19994557	53.9673	81.5307	0.595257	0.0014	0.0064302
CMTM4	11:10854589-10881784	18.9389	28.6163	0.595485	0.00215	0.00878042
EMC7	5:29320291-29327396	31.8844	48.1775	0.595511	0.0011	0.00543256
NSF	27:1159102-1215306	12.0707	18.2393	0.59554	0.00115	0.00558968
SNW1	5:38634499-38651966	14.7444	22.2806	0.595619	0.00125	0.00591812
CLEC3B	2:43675441-43682092	38.9196	58.813	0.595635	0.0009	0.00469705
ENSGALG00000013512	Z:24595533-24602096	11.6039	17.5362	0.595726	0.00675	0.0201482
LRCH2	4:2841454-2877012	2.93811	4.44078	0.595925	0.00425	0.0143593
PSMC3	5:22170649-22185061	48.4684	73.2631	0.596042	0.002	0.00835181
TBL1X	1:124584255-124724404	9.66941	14.6162	0.596067	0.00115	0.00558968
C7orf25	2:51738227-51742886	7.79802	11.7886	0.596211	0.00355	0.0125916
PIGT	20:5439543-5445478	10.9272	16.5212	0.596398	0.00345	0.0123532
COG7	14:6926149-6946062	9.48266	14.3382	0.596504	0.00205	0.00849982
SLC43A2	19:5305961-5329691	23.3018	35.2347	0.596555	0.00115	0.00558968
SRGAP1	1:33468636-33541359	2.30931	3.4921	0.596631	0.00225	0.00907145
ATP5J	1:101882850-101884143	172.821	261.353	0.596722	0.00165	0.00724511
SEC62	9:19344397-19360094	20.2791	30.669	0.596787	0.00145	0.00658988
MAPKBP1	5:24330574-24419530	3.00675	4.54733	0.596815	0.00435	0.0145582
WDR75	7:371298-388006	9.2361	13.9697	0.596949	0.0021	0.0086549
RND3	7:34511198-34526274	2.6682	4.0359	0.597027	0.00915	0.0250051
COLGALT2	8:7708807-7742581	4.81651	7.28545	0.59703	0.00525	0.0166721
SNX16	2:121309188-121333508	1.89912	2.87302	0.597236	0.02315	0.0495768
ENSGALG00000009237	4:19505913-19508259	10.2146	15.4538	0.597331	0.00175	0.00756757
ENSGALG00000026537	AADN03014988.1:20-1566	27.7323	41.9576	0.597365	0.01735	0.03997
OLFML2B	8:3773061-3782255	18.1981	27.5345	0.597449	0.0015	0.00677756
GLIPR2	2:89750649-89775889	3.63587	5.50125	0.597461	0.0115	0.0293083
GNG12	8:27595439-27607341	7.32071	11.077	0.597513	0.0051	0.01632
RAP1GDS1	4:59298213-59387366	17.3011	26.1803	0.597613	0.00145	0.00658988
FAF1	8:22702156-22816200	10.157	15.3722	0.597847	0.00085	0.00450863
TARSL2	10:5713842-5728886	9.39924	14.2269	0.598006	0.0011	0.00543256
TTC28	15:7554368-7671872	6.66494	10.0888	0.59809	0.00135	0.00627457
CDH17	2:125754666-125783019	2.05331	3.10838	0.598209	0.0074	0.0215326
GAL8	3:107064423-107067093	109.765	166.183	0.598361	0.00115	0.00558968
STAT6	AADN03024934.1:20-1263	31.8107	48.1628	0.598406	0.0028	0.0106562
DOCK9	1:143960154-144042261	5.70016	8.63043	0.598432	0.00115	0.00558968
NIP7	11:18378689-18380054	39.2135	59.3819	0.598671	0.0014	0.0064302
NDUFS3	5:22088780-22093418	49.7963	75.4094	0.598706	0.0014	0.0064302
ATP2B1	1:43273705-43305815	9.15043	13.857	0.598708	0.001	0.00507385
ENSGALG00000013378	28:1210142-1212697	6.12031	9.26919	0.598837	0.01585	0.037392
RFC4	9:15678910-15690512	6.52225	9.87804	0.598856	0.00675	0.0201482
ABL	17:6007954-6037442	15.723	23.8129	0.598866	0.0014	0.0064302
COX5A	10:1891956-1896138	94.9827	143.86	0.598931	0.0018	0.00770675
AP3M1	6:14941844-14956153	38.7958	58.775	0.599302	0.00105	0.00524103
POLR3E	14:8663991-8691249	3.79339	5.74771	0.599499	0.00445	0.0147995
SLCO2A1	9:4063858-4088360	16.362	24.7928	0.59957	0.002	0.00835181
FEM1C	Z:78721888-78735286	7.64006	11.5769	0.599588	0.0029	0.0109265
VIMP	10:17108665-17115643	64.5169	97.7719	0.599742	0.00175	0.00756757
CNTRL	17:8344383-8375229	2.18726	3.31471	0.599758	0.0013	0.00609065
ENSGALG00000017239	1:187466812-187482868	39.3652	59.6598	0.599839	0.00115	0.00558968
PLA1A	1:79608385-79625612	44.7255	67.7858	0.599885	0.00145	0.00658988
PREP	3:68127683-68220253	18.7121	28.3609	0.599937	0.0011	0.00543256
CSF2RB	1:51403705-51417083	2.98077	4.5178	0.599937	0.00295	0.0110613
MRPL2	3:4287639-4290846	40.8878	61.9852	0.600251	0.00115	0.00558968
ENSGALG00000012954	2:75483064-75633537	15.3709	23.3061	0.600511	0.001	0.00507385
TTC19	19:6449078-6462281	10.854	16.4575	0.600522	0.0112	0.0287951
ELK4	26:2138283-2146798	16.0796	24.3817	0.600565	0.0015	0.00677756
NENF	3:21266781-21271184	15.2555	23.1326	0.600597	0.0008	0.00432192
ATP8B2	25:1287269-1293699	9.91165	15.0298	0.600626	0.0021	0.0086549
SEC31A	4:45743705-45779300	45.1634	68.4862	0.600659	0.00405	0.0138803
UBE2D3	4:60519149-60527174	32.2013	48.8334	0.600751	0.0014	0.0064302
FGGY	8:25416351-25524129	13.7309	20.8235	0.600781	0.00125	0.00591812
CTCF	11:1102640-1128402	8.93028	13.5438	0.600854	0.00085	0.00450863
METAP2	1:45406752-45421533	16.055	24.3501	0.600902	0.0014	0.0064302
ENSGALG00000016136	2:148430434-148441975	5.95824	9.03845	0.601189	0.00515	0.0164395
CUL4A	1:136854215-136888547	8.57997	13.016	0.601247	0.0017	0.00741449
C26H6ORF125	26:4554865-4559638	59.053	89.5991	0.601472	0.00175	0.00756757
RSFR	6:8804969-8806179	106.362	161.381	0.601479	0.00105	0.00524103
ENSGALG00000002239	14:14929359-14941980	3.03524	4.60588	0.601666	0.0116	0.0294988
EIF3A	6:29508819-29537182	26.8653	40.7715	0.601817	0.00215	0.00878042
PPP2R4	17:5509514-5533835	18.8407	28.5963	0.601975	0.0009	0.00469705
RBM33	2:7967844-8053409	12.1726	18.4792	0.602268	0.00075	0.00411848
CRKL	15:8263817-8276769	4.25713	6.46341	0.602413	0.00475	0.0155102
42436	7:36187550-36206842	10.2734	15.5981	0.602464	0.0018	0.00770674
SATB1	2:35683543-35774433	2.40012	3.64446	0.6026	0.00775	0.0223176
CAP1	23:5502014-5513740	36.4554	55.3602	0.602719	0.00135	0.00627457
COQ9	11:566403-572627	47.3727	71.9439	0.602816	0.00095	0.00489457
CCND3	26:5065131-5077551	10.1386	15.3974	0.602833	0.0034	0.0122304
HIF1A	5:53884052-53914606	5.59065	8.49095	0.602909	0.0012	0.00575369
ARIH1	10:1166623-1184499	11.9918	18.2128	0.602911	0.0048	0.0156124
ASH1L	25:1386031-1419314	10.3904	15.7818	0.603008	0.0016	0.00708415
PGS1	18:10070950-10115046	6.6051	10.0331	0.603114	0.00815	0.0230713
GUCY1B3	4:20263827-20346052	5.12187	7.78067	0.603225	0.007	0.0206987
ANKH	2:76201669-76237846	64.5613	98.0797	0.603285	0.00135	0.00627457
SMPD4	15:8326505-8342460	5.36052	8.14363	0.603299	0.0033	0.0119665
ZNRF2	2:41855712-41908175	39.2794	59.6804	0.603486	0.0059	0.0182548
RGS3	17:1365414-1417184	4.11484	6.25249	0.603593	0.0062	0.0189175
ARHGAP18	3:57506531-57565989	4.03096	6.12523	0.603638	0.0023	0.00921262
PSIP1	Z:31796052-31830251	5.24344	7.96831	0.60376	0.00325	0.0118588
KIAA0430	14:7517490-7540045	4.17428	6.34361	0.603776	0.0017	0.00741449
SPRED2	3:9931279-9952997	7.29468	11.0864	0.603873	0.00135	0.00627457
PSMD1	9:14616053-14669519	42.2079	64.1611	0.604185	0.0013	0.00609065
TRIM37	19:7166863-7187511	5.46212	8.30421	0.604382	0.0019	0.00801155
IFT172	3:104023555-104057142	3.05327	4.64213	0.604431	0.0028	0.0106562
TSSC4	5:12992372-12996744	9.98255	15.1776	0.60446	0.00105	0.00524103
ANAPC15	AADN03013815.1:20-2356	13.3894	20.3577	0.604487	0.0059	0.0182548
BAP1	12:3105786-3117227	13.1061	19.9299	0.604693	0.0016	0.00708415
NCKAP1	7:2220523-2272149	22.4863	34.1949	0.604735	0.0016	0.00708415
KAT2B	2:36428841-36470733	26.7029	40.6098	0.604835	0.00305	0.0113128
METAP1	4:59539392-59553263	14.9447	22.7285	0.604869	0.00185	0.00786604
SUMF2	19:4892267-4895907	13.2135	20.0987	0.605088	0.0075	0.0217424
FBXW4	6:22279694-22338315	21.4894	32.6883	0.605145	0.00115	0.00558968
BRD9	2:55652752-55674826	4.19401	6.37979	0.605178	0.0058	0.0180266
ITSN2	3:103895601-103938672	10.5849	16.1015	0.605191	0.00095	0.00489457
NAGPA	14:13362760-13371618	7.03505	10.7017	0.605212	0.0161	0.0378442
FMO3	8:4792392-4800086	345.483	525.596	0.605337	0.02145	0.0468204
MCTP2	10:14461078-14573856	1.12073	1.70507	0.605391	0.0162	0.0380104
TPST1	19:4994109-5016258	23.3148	35.4726	0.605458	0.00125	0.00591812
MFAP1	10:19610732-19616269	7.58562	11.5419	0.605544	0.00775	0.0223176
PARD3	2:13068735-13498548	20.9883	31.9406	0.605804	0.0017	0.00741449
TRAP1	14:12473313-12491461	44.7798	68.1556	0.605983	0.00125	0.00591812
JAG2	5:52023887-52086423	2.0981	3.19338	0.606	0.0027	0.0103805
AP1S2	1:121232734-121264871	16.5389	25.1741	0.606079	0.00385	0.0133674
GNA11	28:1195930-1202586	18.3161	27.8802	0.60613	0.00215	0.00878042
ITM2B	1:168013343-168038680	95.1335	144.823	0.606267	0.0011	0.00543256
UBE2Z	27:3481603-3491762	8.72414	13.2813	0.606311	0.0092	0.0250655
ULK3	10:1911540-1917110	4.4432	6.76451	0.606386	0.02305	0.0493898
GFOD2	11:591975-597475	6.61352	10.0687	0.60639	0.00525	0.0166721
XPR1	8:5813032-5888825	28.5093	43.4045	0.606412	0.00125	0.00591812
IMMT	4:85046210-85059057	60.5525	92.1954	0.606507	0.0026	0.0101126
EIF2AK3	4:85642569-85690468	9.62061	14.6497	0.606674	0.0008	0.00432192
HERC3	4:34496080-34542198	9.49573	14.4605	0.606763	0.00125	0.00591812
ARHGAP26	13:16744796-16844189	6.26498	9.54063	0.606774	0.00275	0.0105311
HN1	18:10931325-10941487	23.3839	35.6141	0.606937	0.0016	0.00708415
GGNBP2	19:8148377-8165006	7.2776	11.084	0.606945	0.0015	0.00677756
ENSGALG00000026460	7:25759066-25774582	1.50188	2.28742	0.606956	0.01055	0.0276287
CNNM2	6:22937885-23025465	8.61195	13.1164	0.606963	0.01165	0.0296066
HEATR6	19:8668871-8684167	3.18917	4.85742	0.60701	0.00955	0.0257607
KIAA0895	2:47359886-47375299	3.27067	4.98182	0.607084	0.0164	0.0383334
AR	4:429899-473927	12.4772	19.0058	0.607141	0.0013	0.00609065
DDX21	6:10383542-10389962	18.3755	27.9905	0.60715	0.00115	0.00558968
REV1	1:131946218-131985842	2.02381	3.08316	0.607338	0.00765	0.022084
NARFL	14:6016180-6027849	9.6254	14.6638	0.607343	0.0018	0.00770675
DYNC1LI2	11:10817083-10841597	16.5075	25.1497	0.607419	0.0013	0.00609065
SETD7	4:28804666-28817428	9.53009	14.5194	0.60742	0.00125	0.00591812
TSPO	1:68677125-68680823	32.8023	49.977	0.607467	0.00855	0.0238453
NDUFS1	7:12077168-12090936	132.79	202.348	0.607687	0.0057	0.0178011
N-RAS	26:3847829-3854232	9.2911	14.1585	0.607743	0.001	0.00507385
P3H3	1:76713680-76725911	4.91573	7.49134	0.607818	0.00155	0.00694705
DENND2A	1:56983737-57021332	7.91747	12.0663	0.607869	0.0012	0.00575369
C9orf64	Z:39926481-39935003	8.64577	13.1767	0.607927	0.0025	0.00983496
SEC24D	4:54343364-54387579	14.8535	22.6407	0.608114	0.0009	0.00469705
MRM1	19:8190422-8197163	7.58336	11.5604	0.608288	0.00865	0.0240495
STK4	20:5529248-5569433	23.7898	36.267	0.608313	0.0009	0.00469705
CLASP2	2:45255769-45389575	16.78	25.5811	0.608342	0.0012	0.00575369
ENSGALG00000002326	Z:8744606-8805424	29.2057	44.5299	0.608527	0.0025	0.00983496
LSG1	9:12296459-12308388	9.00166	13.7251	0.608554	0.00145	0.00658988
PDIA3	10:19625879-19635020	344.489	525.266	0.608589	0.0187	0.0421815
TGDS	1:145692789-145705488	4.72149	7.19983	0.608721	0.0061	0.018715
RC3H1	8:7324975-7355098	17.6667	26.941	0.608775	0.0008	0.00432192
LYPLAL1	3:18464006-18490523	4.45975	6.80112	0.608811	0.0055	0.0173154
R3HCC1	22:1212179-1250082	15.4448	23.5571	0.609043	0.0133	0.0326971
REEP2	13:17664912-17675403	2.75704	4.20563	0.609201	0.0161	0.0378442
EPS15L1	28:4108809-4136967	4.12912	6.29865	0.609207	0.00365	0.0128603
PCNXL4	5:54497707-54507256	3.59867	5.49106	0.609622	0.00435	0.0145582
PLA2G4A	8:9703364-9767904	3.7766	5.76351	0.60986	0.00235	0.00938393
GLYR1	14:14390940-14414585	27.8731	42.5423	0.610025	0.0005	0.00306562
ORMDL3	27:4300375-4305930	13.1753	20.1098	0.610056	0.0012	0.00575369
GTF2A2	10:4892732-4897305	19.2533	29.3884	0.610143	0.00655	0.0197074
SPINT1	5:23536720-23555298	14.7215	22.4722	0.610211	0.0011	0.00543256
SCAPER	10:2708076-2848150	4.66779	7.12615	0.610383	0.00085	0.00450863
OGDH	22:4027420-4048078	36.016	54.9943	0.610644	0.001	0.00507385
ZNF106	5:24964877-24999878	3.52083	5.37629	0.610696	0.00055	0.00326589
MYLK	7:26674969-26859021	31.5347	48.1571	0.610811	0.00925	0.0251783
DDB2	5:22451124-22465633	4.28462	6.54422	0.611054	0.0033	0.0119665
SRP9	3:16598306-16603854	27.1932	41.5373	0.611162	0.00155	0.00694705
ENSGALG00000001652	15:708056-731858	58.9974	90.1209	0.611211	0.00065	0.0036944
ABCC1	14:7628433-7676063	3.09064	4.72119	0.611244	0.0012	0.00575369
GTPBP1	1:50673665-50690868	13.4918	20.6112	0.611348	0.00165	0.00724511
ENSGALG00000007355	4:10940907-10954814	22.9069	34.9956	0.61139	0.00115	0.00558968
HHIP	4:30294674-30371237	3.9861	6.08976	0.611406	0.0048	0.0156124
BAG4	22:2268641-2273194	7.65176	11.6904	0.61146	0.00955	0.0257607
TRIM25	18:6254681-6261401	40.8991	62.4896	0.611546	0.00195	0.0081693
GALNT7	4:42697172-42736160	2.71251	4.14452	0.611578	0.0034	0.0122304
CTSZ	20:11240111-11244142	137.196	209.628	0.611588	0.00185	0.00786604
IPMK	6:4731814-4761989	22.4054	34.2365	0.61169	0.0014	0.0064302
42619	4:16468296-16491820	20.3691	31.1252	0.611704	0.0008	0.00432192
FAM208A	12:8385331-8413801	3.82748	5.84865	0.611708	0.0012	0.00575369
LUM	1:43860882-43872867	17.5936	26.8853	0.61177	0.003	0.0111877
JADE1	4:34002113-34039693	6.61064	10.102	0.611779	0.0016	0.00708415
TMCO3	1:136694299-136726217	3.79297	5.79649	0.61185	0.0089	0.0245286
FKBP10	27:4679152-4685639	3.0787	4.70494	0.611858	0.01405	0.0339619
ECHDC1	3:58652278-58689083	7.52774	11.5044	0.611891	0.0079	0.0226212
COPG1	12:9090876-9109855	55.8887	85.4157	0.611945	0.0013	0.00609065
ATF1	LGE22C19W28_E50C23:136856-150416	11.8146	18.0568	0.611968	0.00085	0.00450863
ZBTB37	8:7382137-7387189	12.8379	19.6218	0.612043	0.00245	0.00969048
IRF1	13:16213205-16217341	37.2925	56.9997	0.61207	0.00145	0.00658988
AASS	1:22638790-22669004	9.15812	13.9983	0.612129	0.00075	0.00411848
FAM98A	3:30398551-30414526	8.84901	13.5285	0.612413	0.00155	0.00694705
UBE2G1	19:3157500-3167823	45.8969	70.1727	0.612515	0.00075	0.00411848
AK2	23:5276737-5280970	77.0091	117.743	0.612539	0.0007	0.00392322
TCN2	15:10781347-10783629	47.2751	72.2814	0.612544	0.00095	0.00489457
DGKE	18:6237042-6244527	7.77694	11.8909	0.612581	0.00345	0.0123532
ZC3H7B	1:49547223-49586558	18.9629	28.9945	0.612597	0.00105	0.00524103
NR6A1	17:9453952-9475017	3.31446	5.06785	0.612602	0.0145	0.034769
RALBP1	2:98407579-98438734	17.0409	26.059	0.612781	0.00095	0.00489457
SNX30	Z:65685567-65734943	7.04745	10.7771	0.612802	0.00295	0.0110613
PPHLN1	1:29528944-29590293	4.02503	6.15573	0.61293	0.01905	0.0428222
chPKCI	Z:44758625-44762622	170.836	261.273	0.612946	0.0011	0.00543256
CHPF2	2:122158-126483	19.0872	29.1917	0.612952	0.00055	0.00326589
PCGF6	6:23110410-23132990	6.74844	10.3215	0.613027	0.00185	0.00786604
ANKRD12	2:98462086-98504384	1.81241	2.77234	0.613198	0.0012	0.00575369
POLA1	1:117286492-117477666	4.05479	6.20412	0.6136	0.0012	0.00575369
HPS5	5:11874818-11894777	9.18136	14.0486	0.613649	0.00175	0.00756757
SH2B3	15:6102035-6113781	10.6455	16.2898	0.61373	0.00625	0.0190203
URB1	1:104229675-104274473	4.94736	7.5705	0.613731	0.0006	0.00347619
ELOVL6	4:57576631-57597173	473.316	724.289	0.61376	0.00385	0.0133674
ARIH2	12:11652997-11684571	10.4186	15.9432	0.613774	0.0009	0.00469705
MMAA	4:30627024-30633032	10.9631	16.7774	0.613863	0.00325	0.0118588
NOL10	3:96431380-96474400	3.85006	5.89218	0.613919	0.00585	0.0181434
NT5C3B	27:4685680-4690379	24.1839	37.012	0.613949	0.0013	0.00609065
DMTF1	1:7361807-7390379	3.47172	5.31349	0.614011	0.0039	0.0134929
PAK2	9:4139320-4162444	13.0863	20.0306	0.614155	0.00125	0.00591812
ASB5	4:43775823-43808347	14.9724	22.9196	0.614277	0.0015	0.00677756
10	15:5297890-5339287	26.9001	41.1855	0.614528	0.00215	0.00878042
FAM174B	10:14039363-14055885	5.48617	8.3998	0.614555	0.00915	0.0250051
PSEN2	3:11843163-11859876	11.8254	18.1058	0.614568	0.00105	0.00524103
GNB2L1	16:139263-142727	529.319	810.445	0.614578	0.00635	0.0192494
R3HDM1	7:30060586-30129669	6.28319	9.62041	0.614601	0.00065	0.0036944
CHSY1	10:17041537-17094017	6.84316	10.4804	0.614961	0.00375	0.0131571
SMC2	Z:66288452-66312320	6.38407	9.77819	0.615091	0.0018	0.00770675
AEBP1	JH376336.1:20-3018	4.5647	6.99276	0.615343	0.01145	0.0292319
PCDHGC3	13:1217193-1247116	13.6716	20.9464	0.615525	0.00115	0.00558968
SPTBN1	3:2625284-2715782	51.1714	78.403	0.615572	0.01065	0.0278095
POLDIP2	19:5623982-5633359	53.9803	82.7072	0.615581	0.00185	0.00786604
SLC26A11	18:9819300-9824829	9.49312	14.5457	0.615641	0.01345	0.0329687
CCT2	1:35461550-35477625	14.9436	22.901	0.615887	0.00085	0.00450863
RPRD2	25:1531521-1538194	5.88013	9.01154	0.615926	0.0017	0.00741449
NOD1	2:41819533-41843672	4.12843	6.327	0.615929	0.00355	0.0125916
NR3C1	13:16854277-16904972	18.5424	28.4174	0.615943	0.00115	0.00558968
CD3E	24:5471598-5478513	5.84487	8.95823	0.616042	0.0039	0.0134929
ENSGALG00000003022	8:4280637-4283235	108.916	166.935	0.616065	0.00145	0.00658988
APBB1IP	2:16026710-16084527	3.74562	5.74148	0.616218	0.0071	0.0208992
HHLA2	1:86867700-86874706	17.6419	27.0433	0.616267	0.0012	0.00575369
UBE4B	21:3595755-3630094	14.024	21.4982	0.616317	0.0006	0.00347619
ATXN1L	11:19192363-19194436	7.54343	11.5642	0.616376	0.00305	0.0113128
ENSGALG00000025902	AADN03014805.1:9025-20880	2.75822	4.22925	0.616662	0.00215	0.00878042
PDK3	1:117529893-117579804	27.6082	42.3343	0.616728	0.0008	0.00432192
KLHDC1	5:57525084-57552345	9.34212	14.3256	0.616777	0.00375	0.0131571
ATHL1	5:1603045-1611963	5.06847	7.7727	0.616867	0.01085	0.0281368
SPAG9	18:10259333-10316575	8.91943	13.6789	0.616932	0.00045	0.00284262
NUB1	2:6187455-6200306	15.4678	23.7218	0.616943	0.00085	0.00450863
OGFOD1	11:2138804-2146665	6.76693	10.379	0.617099	0.00415	0.0141194
JUN	8:25267212-25268157	23.0201	35.3115	0.617246	0.00225	0.00907145
SNORA2	JH375755.1:20-8543	1984.96	3044.83	0.617256	0.0209	0.0459981
SDC1	3:101228448-101234491	18.1362	27.822	0.617352	0.0008	0.00432192
42628	8:14844248-14863027	59.5748	91.3974	0.617451	0.00065	0.0036944
NARF	18:3453716-3468178	5.63669	8.64782	0.617488	0.0026	0.0101126
ZRANB2	8:28011854-28023641	7.65092	11.7387	0.617569	0.00135	0.00627457
TIE1	8:18560219-18571250	11.5369	17.7039	0.617817	0.00125	0.00591812
TNRC6C	18:4000419-4034329	7.31082	11.2197	0.617932	0.0007	0.00392322
RREB1	2:64735014-64854227	12.4321	19.08	0.61799	0.0009	0.00469705
ACAT2	3:44881986-44889927	236.188	362.589	0.6184	0.0064	0.0193708
LMF2	1:601645-606054	42.9362	65.915	0.618411	0.0007	0.00392322
RPS13	5:11136189-11139937	274.169	420.899	0.618412	0.00105	0.00524103
NAALADL2	9:17795976-17991569	10.0246	15.3906	0.618507	0.0009	0.00469705
HSPA4	13:16530628-16547788	9.92644	15.24	0.618519	0.0005	0.00306562
ENSGALG00000008936	17:927030-933004	38.242	58.7149	0.618566	0.0007	0.00392322
TBC1D22B	26:203128-219263	4.98361	7.65184	0.618617	0.00365	0.0128603
GPR180	1:145671021-145692774	2.41863	3.71382	0.618715	0.0139	0.033718
RARS	13:4107410-4122810	24.0827	36.9866	0.619006	0.00055	0.00326589
ARFGAP2	5:22500203-22509570	24.2566	37.2563	0.619106	0.0008	0.00432192
TMEM150C	4:45806755-45815679	16.3655	25.1387	0.61925	0.00105	0.00524103
HEATR5B	3:31374262-31424700	5.95812	9.15214	0.619251	0.001	0.00507385
C4BPA	26:2627128-2639856	13.474	20.7043	0.619752	0.0012	0.00575369
AKT1	5:51498352-51561465	15.2513	23.4358	0.619782	0.0003	0.00210198
GNAI3	JH375456.1:37926-46575	39.3082	60.4075	0.619896	0.0007	0.00392322
DNASE2	8:15543481-15552741	37.9795	58.3657	0.619902	0.001	0.00507385
NSUN4	8:20501439-20505675	6.16798	9.47888	0.619919	0.0083	0.0233769
SSH1	15:6570786-6598063	7.93895	12.2005	0.619923	0.00125	0.00591812
UBN1	14:13227862-13253695	3.0809	4.7349	0.619982	0.0018	0.00770675
TOP1	20:5180401-5242581	15.0179	23.0826	0.620125	0.00135	0.00627457
KLHL36	11:16304441-16316647	4.90821	7.54412	0.620154	0.00615	0.0187993
GEMIN6	3:15882997-15885252	7.41913	11.404	0.620217	0.01795	0.0409484
STIP1	AADN03023014.1:20-5804	41.5934	63.9386	0.620333	0.00085	0.00450863
PTPLAD1	10:17541427-17549930	60.4727	92.9615	0.620349	0.00095	0.00489457
CDYL2	11:14761129-14784372	5.64588	8.67951	0.620415	0.0047	0.01539
MRE11A	1:184881192-184902136	3.31922	5.10288	0.620466	0.00175	0.00756757
LARP1	13:11378039-11390962	51.3286	78.9144	0.620525	0.003	0.0111877
GXYLT1	1:29410643-29441662	4.03083	6.19719	0.620537	0.0029	0.0109265
PFN2	9:23218002-23220395	92.6153	142.419	0.620819	0.0007	0.00392322
ATP13A1	JH376279.1:119500-136255	14.9986	23.069	0.62113	0.0092	0.0250655
TNK2	9:14431461-14446450	6.27682	9.65462	0.621185	0.00135	0.00627457
KCTD20	26:1495716-1504229	9.70662	14.9306	0.621228	0.003	0.0111877
FBXO11	3:8669452-8709640	10.6485	16.3805	0.621328	0.0008	0.00432192
GIGYF2	9:491532-565181	10.1947	15.6826	0.621346	0.00075	0.00411848
ASB6	17:5646583-5651589	5.49886	8.45916	0.621381	0.00625	0.0190203
PXDN	3:92498868-92574721	4.12691	6.34864	0.621386	0.00085	0.00450863
FRMD6	5:57949662-57956993	10.3869	15.983	0.621773	0.0027	0.0103805
ENSGALG00000009504	6:30622046-30630164	10.8163	16.644	0.621787	0.00245	0.00969048
FNBP4	5:103356-113031	10.8593	16.7105	0.62183	0.00105	0.00524103
ENSGALG00000002696	Z:1078184-1081530	593.111	912.81	0.622013	0.0052	0.0165583
VAMP4	8:4694855-4707280	12.9769	19.9721	0.622037	0.00105	0.00524103
MRPS23	19:8751273-8753292	18.8441	29.0022	0.62205	0.00225	0.00907145
42615	9:4480808-4499952	9.30437	14.3222	0.622276	0.00085	0.00450863
RDH10	2:117438974-117467086	9.54566	14.6946	0.622373	0.00065	0.0036944
ATP7A	4:12865314-12889632	6.58315	10.1348	0.622468	0.00075	0.00411848
UBXN6	28:2468694-2473068	6.43034	9.89984	0.622511	0.0066	0.0197966
ENSGALG00000004643	5:911236-915085	27.5518	42.4225	0.622681	0.00105	0.00524103
FAM65C	20:13811823-13879197	4.57451	7.04377	0.622731	0.0057	0.0178011
CTDSPL	2:4477122-4544868	34.7338	53.4842	0.622773	0.00105	0.00524103
PEBP1	15:9892016-9894039	166.717	256.738	0.622894	0.0018	0.00770675
UBAP2L	25:1301333-1320300	6.19153	9.53559	0.623026	0.0019	0.00801155
LAS1L	4:80823-106303	6.23096	9.59634	0.623029	0.00265	0.010249
CCBE1	Z:9157780-9247668	4.33982	6.68422	0.623124	0.00095	0.00489457
TMSB4X	1:122807091-122808710	457.919	705.324	0.623194	0.0053	0.0167807
CHURC1	5:162543-163912	232.124	357.558	0.623279	0.0031	0.0114401
LYSMD4	10:16577767-16582386	13.1624	20.2806	0.623683	0.00905	0.0248073
STX6	8:5790974-5804968	11.6017	17.8783	0.623875	0.00135	0.00627457
ACTR8	12:7223207-7230233	6.7178	10.3526	0.623928	0.0023	0.00921262
GSTA3	3:87785841-87793876	161.452	248.813	0.623958	0.0016	0.00708415
ZNF692	16:215496-221850	4.60614	7.09895	0.624048	0.01445	0.0347061
FAM171A1	2:20374797-20457442	4.59277	7.07876	0.624131	0.00265	0.010249
RAI14	Z:10323539-10401787	2.25581	3.47685	0.624133	0.0049	0.0158318
WBP4	1:165145974-165167892	5.88067	9.06421	0.6242	0.0009	0.00469705
LIG3	19:4503026-4518242	10.9679	16.9055	0.624202	0.0005	0.00306562
LNPEP	Z:51426183-51474648	10.0544	15.4977	0.624223	0.0006	0.00347619
U2AF1	1:109065786-109081673	6.15603	9.489	0.624257	0.0006	0.00347619
SCAMP2	10:1905023-1911188	16.0179	24.6927	0.624396	0.0019	0.00801155
NPC1	2:102694752-102735947	22.3912	34.5184	0.624433	0.00425	0.0143593
GTF2H4	17:1826167-1863962	5.25207	8.09747	0.624586	0.0013	0.00609065
RFTN1	2:34829806-34925176	9.66188	14.8966	0.624605	0.00035	0.0023562
PFKP	2:11354184-11395733	5.25993	8.10994	0.624647	0.00215	0.00878042
DHDH	JH376330.1:20-3262	11.9008	18.3497	0.624698	0.0132	0.0324923
DNAL4	1:50651897-50656141	10.9912	16.9479	0.624756	0.00505	0.0162222
ACTG2	6:18777068-18785435	60.8123	93.778	0.624887	0.00115	0.00558968
GATB	4:32883597-32923376	4.55748	7.02966	0.625218	0.0063	0.0191227
HERPUD1	11:613333-617879	38.4207	59.2632	0.625254	0.00045	0.00284262
NUP214	17:6092440-6131600	11.7116	18.0652	0.625269	0.00095	0.00489457
DAG1	12:2441414-2452604	14.7697	22.7824	0.625282	0.0011	0.00543256
STAT2	AADN03022145.1:190-2670	9.33125	14.3941	0.625333	0.0128	0.0317284
DPM1	20:13731016-13739373	35.6908	55.0571	0.625376	0.00115	0.00558968
ADA	20:5699880-5712513	4.01683	6.19663	0.625425	0.0061	0.018715
ITPKB	3:11880209-11928026	8.28399	12.7801	0.625496	0.0018	0.00770675
UHRF1BP1L	1:47005209-47057837	7.92095	12.2204	0.625548	0.001	0.00507385
RC3H2	17:8783065-8799009	7.86373	12.1326	0.625597	0.0007	0.00392322
SNX2	Z:81065451-81098201	30.0258	46.3273	0.625658	0.00085	0.00450863
PSMD9	15:5686961-5689686	34.7771	53.659	0.625683	0.0005	0.00306562
RBM18	17:8735371-8746194	7.23328	11.1606	0.625696	0.0028	0.0106562
ENSGALG00000004644	4:261648-275014	5.58377	8.61551	0.625698	0.0023	0.00921262
GUK1	2:2334606-2343799	14.0736	21.7171	0.625838	0.00425	0.0143593
RPS6KL1	5:37387518-37391470	5.40622	8.34296	0.62594	0.01975	0.0440145
JPH1	2:117820323-117897580	11.9161	18.3892	0.625945	0.00105	0.00524103
MAP3K4	3:44538064-44608530	4.11792	6.35499	0.625975	0.0011	0.00543256
SBNO2	28:2858810-2886701	8.33457	12.8624	0.625985	0.00115	0.00558968
RBBP4	23:5179675-5186712	31.3595	48.3968	0.626008	0.0008	0.00432192
C7orf26	14:12320834-12327480	4.58757	7.08004	0.626028	0.0126	0.031426
CAPZA1	26:3474673-3483306	28.0046	43.2416	0.626755	0.0011	0.00543256
PTPRN2	2:8785741-9406733	0.680977	1.05167	0.627003	0.0218	0.0474337
CARS2	1:138505079-138538107	16.8279	25.9892	0.627052	0.00035	0.0023562
CDH11	11:11582883-11662192	3.33623	5.15285	0.627154	0.00105	0.00524103
C2CD2	1:108458206-108496309	5.32444	8.22433	0.627269	0.00045	0.00284262
EIF3B	14:3105517-3121660	54.0634	83.5101	0.627299	0.00185	0.00786604
UBE2R2	Z:7162502-7215726	12.821	19.8042	0.6273	0.0022	0.00893153
AKAP2	Z:65644354-65663759	3.97995	6.14798	0.627362	0.00145	0.00658988
SNAPC4	17:7892325-7906233	2.4401	3.77014	0.627682	0.0041	0.0140146
CHST13	12:10449679-10473797	5.06339	7.82339	0.627692	0.00275	0.0105311
ZC2HC1B	3:51568838-51580909	1.21064	1.87057	0.627708	0.0229	0.0491857
PEX1	2:22777406-22801107	5.43961	8.4053	0.627796	0.00085	0.00450863
TADA2A	19:8554203-8576278	9.9647	15.3983	0.627868	0.0018	0.00770675
ENSGALG00000008314	12:18590238-18602016	33.1361	51.2051	0.627884	0.0012	0.00575369
TBC1D20	20:10304366-10313704	15.3998	23.7974	0.627898	0.0019	0.00801155
IL16	10:11600709-11632184	1.1989	1.85271	0.627924	0.01205	0.0303917
STRAP	1:63250602-63259735	15.5807	24.0797	0.628052	0.0008	0.00432192
BRD4	JH376279.1:48840-49737	38.7207	59.8462	0.628157	0.00255	0.00998123
VDAC2	6:14411230-14417212	67.7148	104.662	0.628193	0.00055	0.00326589
IFI35	27:5102843-5105307	45.9465	71.0186	0.628241	0.0012	0.00575369
ITGAV	7:1298617-1342313	29.9311	46.2667	0.628329	0.00075	0.00411848
WBP11	1:47916129-47924400	6.81443	10.5345	0.62846	0.0007	0.00392322
HBSF7	1:187935345-187939781	39.1499	60.5244	0.628508	0.00125	0.00591812
POLR1C	3:30267740-30271164	14.4131	22.2825	0.628538	0.00275	0.0105311
KMT2A	24:4343440-4373793	3.49561	5.40438	0.628585	0.00055	0.00326589
NAGA	1:49284425-49288732	22.6098	34.9566	0.628615	0.0007	0.00392322
APBA3	28:986012-990764	3.36672	5.20525	0.628627	0.02095	0.0460648
WDR47	8:1339060-1355865	1.84093	2.84641	0.628709	0.00895	0.0246199
FAM189A2	Z:34532094-34557064	4.02624	6.22543	0.628739	0.00815	0.0230713
STAU1	20:6780570-6803177	13.5458	20.946	0.62883	0.00085	0.00450863
MAP3K3	27:2727436-2756153	4.84482	7.49211	0.628928	0.00195	0.0081693
PPWD1	Z:20429520-20443640	6.30992	9.75829	0.629008	0.00355	0.0125916
SNRPG	22:2992733-2994372	78.8401	121.927	0.629021	0.00215	0.00878042
NCOA1	3:105103874-105211518	9.33785	14.4416	0.62907	0.00085	0.00450863
TRIM35	3:104980476-104985240	7.51611	11.6246	0.629126	0.0079	0.0226212
ZNF259	24:5094927-5099515	10.108	15.6336	0.629146	0.00255	0.00998123
TMEM214	3:104135363-104141333	15.1923	23.4978	0.629186	0.00115	0.00558968
ENSGALG00000003150	27:4982346-4989442	13.3921	20.7155	0.629329	0.00095	0.00489457
ENSGALG00000010733	3:34587645-34655329	2.12754	3.29107	0.629373	0.0012	0.00575369
ENSGALG00000026679	AADN03013989.1:20-1073	103.733	160.466	0.629388	0.001	0.00507385
HRG	9:15630562-15640423	144.729	223.886	0.629405	0.0049	0.0158318
PRDM10	24:1505281-1535607	4.81101	7.44311	0.629566	0.00055	0.00326589
GMPS	9:22393884-22417726	24.3725	37.7079	0.629616	0.0013	0.00609065
ASB7	10:16837277-16864104	4.77403	7.38636	0.629656	0.01515	0.0359951
RPL29	12:530130-533027	396.931	614.146	0.629694	0.00545	0.0171857
RWDD2B	1:103312406-103316521	4.79514	7.41944	0.629737	0.0099	0.0264
TNC	17:2640784-2707385	17.1725	26.5741	0.629922	0.0008	0.00432192
MOB1B	4:49526568-49541356	9.20587	14.2467	0.630001	0.00155	0.00694705
ENSGALG00000012312	1:50986026-50990348	45.1276	69.8403	0.63005	0.0005	0.00306562
ZNF512	3:103970331-104002721	6.66715	10.3185	0.63009	0.0075	0.0217424
RPL7A	17:6866151-6869274	491.824	761.21	0.630155	0.0031	0.0114401
RAD54L2	12:2659271-2697071	5.028	7.78204	0.630162	0.0013	0.00609065
SUSD6	5:27163765-27173152	17.7352	27.45	0.630195	0.0005	0.00306562
SNX13	2:29098202-29158505	11.4718	17.756	0.63021	0.00035	0.0023562
BNIP3	6:34329836-34334530	10.7937	16.7077	0.63033	0.01685	0.0391035
ENSGALG00000003670	20:5036694-5037630	10.7206	16.5972	0.63056	0.0136	0.0332596
APH1A	25:1569583-1573307	13.9576	21.6098	0.630637	0.0043	0.014453
YIPF6	4:524379-530999	7.66885	11.8738	0.6307	0.0006	0.00347619
NOP16	13:9736930-9741756	6.97745	10.8038	0.630774	0.01095	0.0283206
ENSGALG00000006123	20:10003532-10043811	0.81355	1.25971	0.630788	0.0113	0.0289693
ENSGALG00000016007	1:104962791-104966121	264.86	410.116	0.630803	0.00105	0.00524103
WBSCR22	19:143081-147832	13.9818	21.6509	0.630882	0.0064	0.0193708
LRRK2	1:14805856-14871215	2.18479	3.38341	0.630981	0.001	0.00507385
ASUN	1:68113042-68133752	14.3314	22.1945	0.631022	0.00055	0.00326589
RAB3GAP1	7:30003367-30021705	9.66913	14.9798	0.631556	0.0004	0.00261006
SNRPF	1:45536658-45538026	31.658	49.0502	0.631688	0.0062	0.0189175
ADAMTS9	12:13713808-13779455	4.43147	6.86644	0.631777	0.00085	0.00450863
RUNDC1	27:5095036-5098091	16.7277	25.9197	0.631809	0.00085	0.00450863
PKD1	14:6293315-6343474	5.1437	7.9705	0.631864	0.00055	0.00326589
HECW1	2:51911546-52082394	1.75819	2.72463	0.631974	0.006	0.0185005
ENSGALG00000005254	11:10903705-10906364	53.2956	82.5927	0.631998	0.0018	0.00770675
ENSGALG00000028009	12:19414581-19417180	32.9626	51.0866	0.632113	0.00065	0.0036944
ILF2	25:684601-690337	32.8363	50.8943	0.632213	0.0024	0.00953469
IQGAP1	10:19800889-19843598	6.02479	9.33888	0.63234	0.00085	0.00450863
rbf	Z:53307242-53309110	252.296	391.08	0.632349	0.00055	0.00326589
FERMT1	3:14643233-14661954	9.08006	14.075	0.632364	0.00195	0.0081693
ADCY9	14:12591025-12649462	9.50731	14.7384	0.632473	0.0008	0.00432192
INTS2	19:7467234-7482256	10.2406	15.8782	0.632741	0.00055	0.00326589
PPIP5K1	10:19647089-19685988	2.06513	3.20214	0.632807	0.0061	0.018715
GTF2H3	15:4933000-4937788	4.38023	6.79288	0.633016	0.0067	0.0200194
ETNK2	26:1658324-1665181	54.503	84.5287	0.633105	0.00095	0.00489457
TMEM11	14:4519508-4527045	24.7649	38.414	0.633333	0.00705	0.0207992
ENSGALG00000028223	AADN03009322.1:8248-18415	1.71732	2.66383	0.633342	0.0203	0.0449657
TRIM3	1:193589381-193595818	30.0492	46.6129	0.633401	0.00055	0.00326589
TCF12	10:6903269-7058903	27.1564	42.1271	0.633458	0.0097	0.0260092
CD276	10:1749545-1760710	2.38094	3.69374	0.633551	0.0043	0.014453
TSN	7:25748553-25752973	36.9006	57.2485	0.633595	0.001	0.00507385
ITPR1	12:18391289-18538450	1.82348	2.82954	0.633872	0.0014	0.0064302
SENP1	JH375554.1:45612-61285	1.99251	3.09191	0.633911	0.0119	0.0301109
calsyntenin-1	21:3493074-3527740	5.62539	8.7293	0.633913	0.00065	0.0036944
NFASC	26:1841733-1918228	1.79783	2.7903	0.634164	0.00285	0.0107903
ENSGALG00000006724	9:2487368-2891929	7.00869	10.8787	0.634292	0.0021	0.0086549
C1H21ORF33	1:109661534-109668400	63.6018	98.7228	0.634316	0.00065	0.0036944
RRM1	1:193761014-193781202	5.07436	7.87649	0.634327	0.0009	0.00469705
ENSGALG00000028762	5:28175233-28186584	4.82121	7.4839	0.634396	0.0064	0.0193708
TOR1A	17:5700661-5704295	30.6262	47.5424	0.63445	0.0006	0.00347619
SIVA1	5:51483192-51485154	17.2285	26.7461	0.634527	0.01565	0.0370174
UBASH3B	24:3136146-3154474	7.13922	11.0838	0.634617	0.0034	0.0122304
COX10	18:2569644-2666638	11.1819	17.363	0.634855	0.00055	0.00326589
CFL2	5:35241368-35244169	10.2508	15.9173	0.634855	0.0022	0.00893153
SCYL3	8:5042663-5055750	9.92513	15.4157	0.635241	0.00055	0.00326589
TNKS2	6:19439616-19465235	12.3607	19.1991	0.635285	0.00045	0.00284262
ADNP	20:13752744-13772968	12.1445	18.8638	0.635319	0.0005	0.00306562
CAMK2D	4:56144607-56305629	10.0371	15.5911	0.635376	0.00495	0.0159669
FEN1	5:245201-247884	5.6454	8.77125	0.635707	0.0025	0.00983496
NUDCD3	22:4063241-4079966	22.4706	34.9127	0.635711	0.001	0.00507385
ITPA	8:4688298-4691874	14.9407	23.2166	0.63591	0.0072	0.0211137
KMT2C	2:6528610-6717633	9.69786	15.0715	0.636089	0.00205	0.00849982
MGST3	8:5456932-5460434	214.36	333.154	0.636152	0.00075	0.00411848
KLHL5	4:69000917-69035222	5.53743	8.60729	0.636343	0.00115	0.00558968
SACM1L	2:43413955-43433376	15.6062	24.2596	0.636431	0.0007	0.00392322
FGFR1OP	3:41783070-41803951	1.58568	2.46505	0.636519	0.0162	0.0380104
SETD3	5:47783077-47906765	2.49338	3.87615	0.636524	0.0038	0.0132648
IKZF1	2:80612646-80685641	1.93811	3.01305	0.63657	0.004	0.0137371
NCAPG	4:75480299-75503309	2.01436	3.13187	0.636697	0.00885	0.0244138
NBL1	21:4764693-4774114	7.71052	11.9884	0.636738	0.00445	0.0147995
KIAA0907	25:1477474-1485201	12.9793	20.1809	0.636781	0.0008	0.00432192
ERBB2	27:4243296-4246638	8.21392	12.7733	0.636987	0.00365	0.0128603
ADAMTS12	Z:10001893-10166119	4.37476	6.80316	0.637001	0.0012	0.00575369
ORC5	1:13157746-13226609	2.0894	3.24932	0.637053	0.01255	0.0313348
TOR1B	17:5694254-5697984	23.4233	36.4299	0.637178	0.00045	0.00284262
ELMO2	20:11076801-11090032	20.6785	32.1611	0.637184	0.0005	0.00306562
GTF2F2	1:166965969-167057679	4.85286	7.54768	0.637197	0.0011	0.00543256
UBR1	5:25256090-25334013	12.5888	19.5809	0.637305	0.00035	0.0023562
TMEM39A	1:80011890-80020223	28.2607	43.9581	0.637334	0.00065	0.0036944
DNAJC8	23:1527806-1542327	19.3405	30.0848	0.637407	0.0005	0.00306562
ENSGALG00000009345	5:25746734-25759009	3.68328	5.72984	0.637505	0.0132	0.0324923
ATP5D	JH375570.1:171-2062	238.799	371.499	0.637562	0.0009	0.00469705
WDR53	9:4202389-4206507	17.8915	27.8372	0.637741	0.0007	0.00392322
UTP18	18:5070323-5081907	4.20295	6.54008	0.637906	0.0009	0.00469705
LCMT1	14:6602196-6621651	3.31494	5.15846	0.637957	0.0161	0.0378442
TMEM129	4:83472172-83479539	13.5766	21.1271	0.637975	0.00055	0.00326589
ARHGAP35	AADN03025913.1:79-9323	16.3456	25.4383	0.638106	0.00025	0.00183995
LRP3	11:9541801-9565159	21.1689	32.9476	0.638225	0.00045	0.00284262
PRCC	25:442474-451872	7.16364	11.1536	0.638745	0.0007	0.00392322
WDR43	3:8488900-8511828	9.39926	14.6357	0.638871	0.0003	0.00210198
IRAK2	12:19418088-19431603	9.14955	14.2475	0.638937	0.00075	0.00411848
SNX25	4:38717203-38769907	7.29927	11.369	0.639282	0.00095	0.00489457
KLHL21	21:561500-569683	3.73871	5.8236	0.63937	0.00265	0.010249
PGM3	3:77333023-77340752	7.23787	11.2741	0.639382	0.00295	0.0110613
IFNGR1	3:54085010-54103750	30.008	46.7456	0.639482	0.00035	0.0023562
RPS6KA3	1:119204997-119237983	19.2719	30.0214	0.639495	0.00045	0.00284262
PLEKHM1	27:1586681-1601817	5.31134	8.27396	0.639501	0.00285	0.0107903
RPN1	12:9149092-9156192	201.332	313.664	0.639645	0.0047	0.01539
ADAM8,TUBGCP2	6:8867265-8904146	12.2253	19.047	0.639695	0.00075	0.00411848
SEC24A	13:15039100-15059788	29.4762	45.9279	0.639822	0.0008	0.00432192
SETD1B	15:5634230-5677257	3.81507	5.94462	0.639876	0.0009	0.00469705
CST3	3:14928611-14932913	78.3779	122.13	0.639903	0.0101	0.0267926
Mlx	27:4967020-4970406	16.38	25.5272	0.640103	0.00075	0.00411848
EIF5B	1:131925075-131944008	7.10254	11.0693	0.64016	0.00035	0.0023562
PARK2	3:43765826-44445298	3.4751	5.41599	0.64017	0.00345	0.0123532
ENSGALG00000001629	18:3670068-3678466	9.73978	15.1843	0.640623	0.0012	0.00575369
ZNF423	11:6182056-6354226	2.65234	4.13507	0.64065	0.0043	0.014453
SLC30A10	3:18207441-18229528	35.093	54.7144	0.640735	0.0022	0.00893153
MED1	27:4144277-4157777	4.19098	6.53428	0.640741	0.00035	0.0023562
PLXNA2	26:2695758-2786683	1.4183	2.21147	0.640846	0.0038	0.0132648
SLC35C2	20:11071602-11076564	32.2046	50.2158	0.640876	0.00045	0.00284262
RUFY3	4:49451497-49492658	11.9214	18.5894	0.640926	0.00095	0.00489457
ZBTB44	24:1593497-1633229	7.52665	11.7374	0.641037	0.00145	0.00658988
GEMIN5	13:11328564-11351905	6.03019	9.40473	0.641183	0.00405	0.0138803
ENSGALG00000003412	17:6788149-6818631	11.2386	17.5286	0.641253	0.00055	0.00326589
HLCS	1:106241753-106353943	20.3826	31.7917	0.641313	0.0006	0.00347619
RAB40C	14:13530713-13555834	3.16408	4.9352	0.64132	0.00455	0.0150635
LRBA	4:32292870-32664499	13.4895	21.0407	0.64134	0.00165	0.00724511
PRKACB	8:15584074-15620490	5.24958	8.18833	0.641368	0.0006	0.00347619
DDX10	1:179240809-179405347	2.60043	4.05676	0.641577	0.00325	0.0118588
ENSGALG00000026778	AADN03023841.1:20-1273	33.5571	52.3591	0.641822	0.002	0.00835181
[4Fe-4S]	14:6254147-6259066	8.85473	13.8165	0.641869	0.00935	0.0253618
FKHR	1:169877051-169935660	7.70209	12.018	0.64187	0.0029	0.0109265
CCDC88C	5:43520944-43605797	4.60305	7.18262	0.64192	0.00055	0.00326589
PTPA	4:88066860-88164601	10.2104	15.9326	0.641939	0.0006	0.00347619
IRS1	9:8726189-8728724	13.9893	21.8298	0.641972	0.0009	0.00469705
TCP1	3:44874172-44881975	60.1661	93.8875	0.641983	0.001	0.00507385
SCAMP5	10:1879817-1884273	9.52383	14.8632	0.642132	0.0009	0.00469705
PUM1	23:459588-528363	23.3968	36.5146	0.642158	0.00085	0.00450863
CHIA	26:5122697-5126812	39.2032	61.1858	0.642225	0.01035	0.0272454
RALGAPB	20:731977-793938	9.47651	14.7916	0.642345	0.0005	0.00306562
RHBDF2	18:4339245-4347080	3.68742	5.75587	0.642425	0.0153	0.0362998
C1QTNF1	1:51283693-51289313	3.30865	5.16486	0.642484	0.00255	0.00998123
ENSGALG00000029008	JH375176.1:54180-55782	6.18618	9.65685	0.642504	0.0044	0.0146667
BIN1	7:23184009-23267807	8.4906	13.2548	0.642581	0.00395	0.0136215
PHIP	3:78926378-79016040	8.26485	12.9043	0.642789	0.00035	0.0023562
ENSGALG00000022802	1:109643345-109660921	6.10145	9.5269	0.642855	0.001	0.00507385
EXOC6B	4:89402350-89584157	2.71003	4.23201	0.643033	0.00195	0.0081693
CHKA	5:15504201-15524926	5.97957	9.33977	0.643347	0.00205	0.00849982
PLVAP	JH375640.1:2146-5383	42.7112	66.7157	0.643412	0.00065	0.0036944
EFTUD2	27:1285830-1302968	21.2895	33.2581	0.643562	0.0001	0.000905426
C3H20ORF3	3:15172838-15185206	95.4335	149.097	0.64368	0.0007	0.00392322
TMLHE	4:10979968-10995125	13.1074	20.4783	0.643717	0.0006	0.00347619
SMC3	6:25533209-25555268	10.3991	16.2471	0.643729	0.00055	0.00326589
NLGN3	4:2300721-2316252	3.25338	5.08324	0.64381	0.0213	0.04658
DJ-1	21:260456-274009	50.3615	78.6878	0.64382	0.0012	0.00575369
ATP6V0A1	27:4929944-4958104	11.9286	18.6389	0.643883	0.00045	0.00284262
CAPN15	14:13435468-13447895	9.07872	14.1864	0.643951	0.0007	0.00392322
TARDBP	21:4065711-4071374	18.5809	29.0346	0.643954	0.00465	0.0152776
VWA8	1:165302185-165480795	30.6373	47.8771	0.644045	0.0014	0.0064302
SUDS3	15:9794820-9817552	10.3234	16.1329	0.644092	0.0006	0.00347619
MTDH	2:127057052-127088247	48.2182	75.361	0.644241	0.001	0.00507385
DGCR2	15:7877610-7915137	12.3866	19.361	0.644367	0.00045	0.00284262
ARID1B	3:50465763-50754522	7.83504	12.2486	0.644608	0.00075	0.00411848
BRPF3	26:184443-202634	5.1269	8.01612	0.644817	0.00105	0.00524103
PTPRC	8:2019147-2076592	11.7295	18.3397	0.644831	0.0005	0.00306562
PLCB1	3:13593274-13906402	2.06418	3.22768	0.644925	0.0018	0.00770675
MYD88	2:4800976-4813676	14.2461	22.278	0.645048	0.00045	0.00284262
FAN1	10:5271367-5286793	3.31536	5.18489	0.645149	0.00365	0.0128603
DUSP19	7:2200719-2207177	5.61901	8.78778	0.645183	0.0064	0.0193708
CASP8	7:10949122-10955503	6.6869	10.4589	0.64532	0.00295	0.0110613
ENSGALG00000013992	3:56080842-56088624	378.858	592.573	0.645338	0.00595	0.0183852
ST13	1:49763851-49783636	59.8592	93.635	0.645475	0.0015	0.00677756
EP300	1:49636650-49693714	7.73612	12.1014	0.645493	0.0005	0.00306562
TFDP2	9:9818913-9863003	0.913486	1.42896	0.645506	0.00465	0.0152776
FAM129A	8:7933907-7992849	2.55084	3.99035	0.645539	0.0021	0.0086549
GPATCH2L	5:37839125-37870137	9.34477	14.6214	0.645845	0.00145	0.00658988
GEN1	3:99853930-99870493	1.81259	2.83617	0.645889	0.00875	0.0242237
WRN	4:34117043-34158141	7.22605	11.3067	0.645898	0.00055	0.00326589
UBAC2	1:143798560-143884756	18.9006	29.5741	0.645903	0.0066	0.0197966
MEAF6	23:3708592-3713721	20.4438	31.9893	0.64593	0.0027	0.0103805
FUT8	5:21901388-21963072	1.29492	2.02625	0.645949	0.0049	0.0158318
TBL1XR1	9:17416495-17505171	6.96527	10.8996	0.64602	0.0004	0.00261006
FOCAD	Z:34022934-34119106	3.64485	5.70377	0.646058	0.001	0.00507385
ENSGALG00000003696	15:5201855-5206836	6.36514	9.96077	0.646065	0.00305	0.0113128
GNPAT	3:40017545-40038387	12.5765	19.6823	0.646176	0.00155	0.00694705
AHCYL1	26:1251360-1260028	25.9089	40.5491	0.646223	0.00055	0.00326589
GJC1	27:1272877-1276164	4.38688	6.86604	0.646283	0.0074	0.0215326
ZBTB10	2:120783327-120809194	6.19865	9.70179	0.646298	0.00065	0.0036944
FAAH2	4:1790748-1795411	16.0543	25.129	0.646396	0.0006	0.00347619
ENOX1	1:166088090-166385249	2.1794	3.41148	0.646467	0.00505	0.0162222
RGL1	8:7641618-7708062	10.2417	16.032	0.646504	0.0004	0.00261006
DHRS7	5:54475805-54493788	429.96	673.048	0.646506	0.0067	0.0200194
PRKDC	2:107610797-107695100	4.12456	6.45655	0.646521	0.00035	0.0023562
TICAM1	28:4625271-4627738	5.31685	8.32338	0.646597	0.00145	0.00658988
ENSGALG00000005964	4:3045898-3051722	5.72727	8.96592	0.646603	0.0109	0.0282163
FTCD	7:6812145-6818978	124.63	195.109	0.646626	0.00115	0.00558968
MFGE8	10:12525892-12534611	17.2037	26.9328	0.646643	0.0008	0.00432192
CDC14A	8:10722447-10772172	5.18548	8.11813	0.64667	0.00225	0.00907145
BOD1L1	4:76956827-76994096	4.40043	6.88936	0.646726	0.0005	0.00306562
GMEB2	AADN03010847.1:20-14003	3.06037	4.79137	0.646732	0.00445	0.0147995
ASPM	8:2593759-2625649	1.73592	2.71792	0.6468	0.00165	0.00724511
FAR1	5:6894685-6919202	4.1319	6.47125	0.647239	0.0081	0.0230134
TTF2	1:83540364-83559456	3.4428	5.39308	0.647526	0.00145	0.00658988
ACADL	7:2715470-2729321	339.207	531.459	0.647793	0.011	0.0284185
ACADL	7:2715470-2729321	339.207	531.459	0.647793	0.011	0.0284185
DYRK3	26:2458765-2464757	3.55146	5.56515	0.648005	0.00835	0.0234499
PPP2R5D	3:4170838-4201309	7.49123	11.7405	0.648214	0.00055	0.00326589
ZC3H12C	1:178905487-178926969	1.94881	3.05456	0.64837	0.013	0.0321151
C14orf80	8:3904085-3968947	1.77415	2.78089	0.648419	0.0103	0.0271567
AGO3	23:4111970-4133770	6.48682	10.168	0.648447	0.00055	0.00326589
AVEN	5:29353734-29438641	6.82592	10.7002	0.648537	0.00515	0.0164395
COPB1	5:9834068-9848544	29.5313	46.2931	0.648554	0.00065	0.0036944
ZCCHC9	Z:63559749-63566581	3.5134	5.50818	0.648706	0.0066	0.0197966
NAT10	5:17802460-17824136	4.43386	6.95261	0.648991	0.0014	0.0064302
PIGS	19:5730520-5734240	12.9769	20.3499	0.649071	0.00165	0.00724511
NUP210	12:5607157-5660512	12.7907	20.0598	0.649213	0.0012	0.00575369
DNAJA2	11:7202522-7210231	25.3256	39.7185	0.649215	0.0006	0.00347619
ITSN1	1:104842436-104956613	12.2828	19.2635	0.649238	0.00055	0.00326589
MICALL1	1:50931991-50950143	1.82652	2.86463	0.649247	0.00755	0.0218494
PACS2	8:4065331-4130263	4.18109	6.55792	0.649358	0.0013	0.00609065
LHPP	6:31565164-31594662	3.70099	5.805	0.649384	0.0028	0.0106562
DPH5	8:10666246-10684195	10.3193	16.1877	0.649553	0.00245	0.00969048
SNAPC1	5:53874252-53882060	5.2162	8.18275	0.649587	0.00965	0.0259287
EXOG	2:5692040-5711470	11.664	18.2985	0.649663	0.0018	0.00770675
VASH1	5:38144495-38157153	34.4678	54.0801	0.649847	0.00085	0.00450863
DNAJB12	6:11009157-11024231	20.7068	32.496	0.650158	0.0033	0.0119665
MTIF2	3:34593-46349	10.0744	15.8106	0.6502	0.00215	0.00878042
EXOSC8	1:171612656-171621656	7.12612	11.1848	0.650356	0.01525	0.0362033
ALG8	1:192050372-192060744	6.99302	10.9765	0.65043	0.00355	0.0125916
RTCA	8:10837703-10851191	10.315	16.1933	0.650649	0.0024	0.00953469
DOCK8	Z:25582285-25666831	3.79397	5.95666	0.650796	0.0004	0.00261006
TRMT10A	4:59624812-59633939	4.69417	7.37059	0.650909	0.006	0.0185005
AFAP1L2	6:27287974-27335710	5.65808	8.88467	0.651005	0.00075	0.00411848
BRAT1	14:3336469-3344212	3.28902	5.16463	0.651009	0.0096	0.0258479
RCHY1	4:34042664-34045851	42.0188	65.9812	0.65102	0.00075	0.00411848
NSMCE2	2:138307229-138433695	3.69294	5.79904	0.651045	0.0189	0.0425341
AZI2	2:39412991-39434386	18.4754	29.0134	0.651115	0.0007	0.00392322
PHF5A	1:49486126-49491789	18.7211	29.3996	0.65113	0.01665	0.0387781
MAML2	1:184236228-184401679	1.39284	2.1874	0.651192	0.01385	0.0336246
ADRBK1	JH376180.1:102048-107507	8.86115	13.9162	0.651203	0.00105	0.00524103
TGFB3	5:37739713-37747666	19.7853	31.0759	0.651371	0.0008	0.00432192
CR1L	26:2599567-2605277	31.9552	50.1912	0.651383	0.0006	0.00347619
LIMS2	9:884375-907393	14.7178	23.1182	0.651472	0.0009	0.00469705
KIF13B	3:105851265-105973615	9.73754	15.2964	0.651566	0.00045	0.00284262
AGL	8:11017202-11051067	21.5605	33.8691	0.651578	0.0007	0.00392322
RRP7A	1:49057125-49060762	12.4856	19.6153	0.651707	0.0017	0.00741449
EPHB2	21:5941758-6038880	16.8412	26.4595	0.651789	0.0004	0.00261006
KIAA0226L	1:167410981-167430542	4.09124	6.42806	0.651848	0.00465	0.0152776
PROSER2	1:6073785-6075369	6.08147	9.55565	0.651935	0.00855	0.0238453
COIL	18:6262354-6267812	2.48812	3.90953	0.65194	0.0192	0.0430847
BTRC	6:22379628-22460065	9.6056	15.0942	0.652043	0.00125	0.00591812
POFUT1	20:10487517-10491477	4.2723	6.71356	0.652064	0.01285	0.0318388
CA9	Z:9084929-9095262	9.84523	15.474	0.652352	0.00835	0.0234499
MFSD6	7:98958-116425	8.92324	14.0252	0.652378	0.001	0.00507385
ST8SIA4	Z:50468933-50526465	3.18725	5.00977	0.652433	0.0007	0.00392322
KDM3A	4:85139883-85166278	6.20919	9.76015	0.652497	0.00035	0.0023562
TOPORS	Z:66940067-66943166	4.03994	6.35039	0.652513	0.0016	0.00708415
ENSGALG00000006013	20:9800880-9833823	3.0924	4.86117	0.652577	0.00615	0.0187993
ATP5B	LGE22C19W28_E50C23:954485-965125	881.044	1385.05	0.652652	0.02005	0.0445386
FASTKD5	4:88189459-88195969	3.20078	5.03182	0.652658	0.00745	0.021635
SPINK4	Z:70481076-70482946	58.6556	92.216	0.652748	0.00245	0.00969048
SLC40A1	7:331707-343582	121.911	191.675	0.652837	0.0016	0.00708415
TAGAP	3:51494687-51502392	2.02006	3.1762	0.652901	0.0049	0.0158318
EXOSC1	6:21891715-21893038	19.6849	30.9513	0.652915	0.0132	0.0324923
SPSB3	14:13206742-13214081	9.31954	14.6535	0.652919	0.0012	0.00575369
LRWD1	19:4154820-4168658	7.06352	11.1063	0.652923	0.0061	0.018715
KBTBD2	2:48646151-48652534	6.38107	10.0351	0.653188	0.0003	0.00210198
SRSF6	20:90321-93827	32.4622	51.0532	0.65324	0.00035	0.0023562
HBS1L	3:55036624-55101252	28.3687	44.616	0.653262	0.013	0.0321151
FUNDC2	4:2148374-2154417	22.1984	34.9153	0.6534	0.00035	0.0023562
UCH-L1	4:68252125-68256752	16.0702	25.2809	0.653661	0.0024	0.00953469
SLX4	14:12438076-12459581	4.28814	6.74628	0.65374	0.00055	0.00326589
SLC27A1	JH376279.1:51665-61348	4.96461	7.81128	0.653877	0.0034	0.0122304
HNRNPR	23:1548636-1571820	32.4014	50.98	0.653878	0.00065	0.0036944
RPS21	20:8282586-8286470	126.961	199.77	0.653954	0.0005	0.00306562
TUSC2	12:1414992-1417524	13.7724	21.6728	0.654111	0.0038	0.0132648
ENSGALG00000000357	22:1041605-1057979	3.45215	5.43355	0.654399	0.00285	0.0107903
PKHD1	3:107230219-107461810	4.75099	7.47987	0.654784	0.001	0.00507385
SLC9A3R1	18:10711116-10718410	115.067	181.17	0.654872	0.00075	0.00411848
GHITM	6:2595573-2602987	260.761	410.572	0.654906	0.0016	0.00708415
RBM47	4:68541427-68547721	19.3891	30.5295	0.654955	0.00075	0.00411848
ENSGALG00000005020	12:5064340-5073296	7.44125	11.7193	0.655266	0.00225	0.00907145
ENSGALG00000014734	Z:18953779-19066955	2.47967	3.90533	0.655295	0.0038	0.0132648
DVL1	21:2297829-2331951	6.39163	10.0668	0.655341	0.00035	0.0023562
C8orf4	22:2478969-2479900	139.424	219.595	0.655366	0.0004	0.00261006
NBAS	3:98343306-98504175	10.4965	16.5355	0.655666	0.00055	0.00326589
PTPN6	1:76818704-76828141	29.284	46.1459	0.656088	0.00035	0.0023562
ENSGALG00000001166	19:2527340-2617445	3.83501	6.04335	0.65612	0.008	0.0228348
THOC5	15:11107872-11126680	9.96388	15.7018	0.656153	0.0002	0.0015308
ALMS1	4:89120582-89171978	3.17039	4.99726	0.65648	0.0002	0.0015308
CMIP	11:14995343-15116123	16.8502	26.5677	0.656913	0.0005	0.00306562
TLR21	11:342412-345901	2.71679	4.28405	0.657072	0.02015	0.0447012
CCDC6	6:8534857-8570007	6.74476	10.6376	0.657334	0.0027	0.0103805
TIMM21	2:91988464-91993769	32.8873	51.8792	0.657626	0.0003	0.00210198
PRPF8	19:5341515-5359506	46.0811	72.6923	0.657629	0.0025	0.00983496
42437	6:17210805-17295313	4.96351	7.83097	0.657831	0.00145	0.00658988
MXRA8	21:2251267-2266024	6.87717	10.8509	0.657926	0.0027	0.0103805
TOMM34	20:5569459-5573011	4.86558	7.67808	0.658135	0.01245	0.0311583
IVD	5:797510-813243	36.45	57.5249	0.658269	0.00045	0.00284262
TMX4	3:13968157-13993904	8.15003	12.8625	0.658291	0.0003	0.00210198
PRKCD	12:1321863-1352568	6.72115	10.6092	0.658534	0.0007	0.00392322
ENSGALG00000001604	24:2565766-2587102	1.88507	2.97562	0.658574	0.00885	0.0244138
cdk6	2:22843080-22962940	17.4902	27.6088	0.658588	0.0014	0.0064302
SLC9A6	4:4161929-4176418	6.75123	10.6578	0.658689	0.0005	0.00306562
HIBADH	2:33345458-33429553	29.908	47.2174	0.658788	0.00095	0.00489457
BCL9	1:91725241-91757762	1.61803	2.5545	0.658805	0.0011	0.00543256
RNF41	JH376377.1:20-7825	11.5492	18.2341	0.658842	0.0016	0.00708415
C1QB	21:6058691-6063086	97.5457	154.015	0.658924	0.0002	0.0015308
ZNF407	2:91473238-91784855	6.02139	9.50782	0.659018	0.00025	0.00183995
BMPER	2:48103439-48249944	6.07158	9.5883	0.659203	0.0016	0.00708415
CRAMP1	14:13697266-13735031	5.00851	7.90966	0.659235	0.0004	0.00261006
KLHL12	26:500628-507262	5.15165	8.13698	0.659459	0.0092	0.0250655
NISCH	12:545788-580519	5.61493	8.86938	0.659566	0.00055	0.00326589
WWC3	1:124275049-124368791	4.05908	6.4118	0.659576	0.00045	0.00284262
ATP6V1E1	1:61931082-61940679	17.4671	27.592	0.659606	0.00035	0.0023562
STK25	9:4571483-4586873	52.1332	82.3566	0.659682	0.00015	0.00122947
NLE1	19:6793679-6801369	6.37078	10.0649	0.659785	0.0024	0.00953469
PPM1B	3:24761762-24820317	25.721	40.636	0.65981	0.0004	0.00261006
EIF2B	20:1976104-1987323	36.4925	57.6535	0.65981	0.0005	0.00306562
NIPA2	1:129800365-129811364	37.4277	59.1361	0.659934	0.00025	0.00183995
TRUB2	17:4987539-4991504	12.5837	19.8826	0.659952	0.0007	0.00392322
TMEM177	7:24797913-24798846	10.2903	16.2594	0.659986	0.01015	0.0268886
LAMC1	8:7449295-7493463	33.4234	52.8123	0.660013	0.0004	0.00261006
chc	19:7285418-7307681	48.3433	76.3945	0.660154	0.0026	0.0101126
ENSGALG00000007683	4:12103011-12126436	6.32295	9.99204	0.660182	0.00075	0.00411848
NRIP1	1:97651373-97654841	16.8755	26.6682	0.66019	0.0004	0.00261006
PNO1	3:11137451-11140992	8.68993	13.7333	0.660267	0.0065	0.0195973
LONP1	28:678762-694768	30.0322	47.4622	0.660271	0.0004	0.00261006
SLC9A7	1:129620478-129659911	5.2148	8.2421	0.660401	0.001	0.00507385
PIGX	9:4176512-4184293	8.05381	12.7295	0.660438	0.02265	0.0487653
PRPF38A	8:23292171-23296086	10.2715	16.2358	0.660527	0.0044	0.0146667
BRD3	17:7156508-7189561	1.38939	2.19623	0.660578	0.0145	0.034769
DNAJB11	9:3861049-3873808	27.8982	44.0997	0.660595	0.0005	0.00306562
FOXM1	1:75109436-75119160	2.2862	3.61447	0.660827	0.00475	0.0155102
BLOC1S4	2:89782268-89789489	16.829	26.6098	0.661008	0.00115	0.00558968
RPS4X	4:1867723-1871061	567.191	896.851	0.661035	0.00275	0.0105311
NEK9	5:37442480-37464017	16.195	25.6085	0.661071	0.00045	0.00284262
CCM2	2:4010847-4035137	9.24101	14.6125	0.661085	0.0006	0.00347619
SGMS2	4:37429510-37456007	16.7663	26.5142	0.661195	0.00085	0.00450863
SLA	2:141333053-141469306	1.8214	2.88035	0.6612	0.01175	0.0298153
EDNRB2	4:11117413-11126899	22.6279	35.7857	0.661281	0.0006	0.00347619
RBFOX2	1:51759799-51835231	9.53946	15.0875	0.661374	0.0049	0.0158318
LYST	3:37277666-37337051	4.74764	7.51077	0.66175	0.00035	0.0023562
DUS2	11:2885818-2903624	6.87725	10.8804	0.66183	0.0159	0.0374873
DENR	15:5264074-5270199	20.9714	33.1809	0.661934	0.00085	0.00450863
PPP1R15B	26:1725756-1731836	13.4372	21.2614	0.662002	0.00055	0.00326589
ENSGALG00000002749	8:3822029-3852986	11.6619	18.4528	0.662036	0.0005	0.00306562
SMC5	Z:34813072-34865378	4.1392	6.54965	0.662067	0.0013	0.00609065
TXN2	1:51573279-51580672	94.3971	149.384	0.662212	0.0004	0.00261006
YIPF5	13:17011665-17018764	26.4862	41.9154	0.662239	0.0001	0.000905426
ENSGALG00000001763	Z:2089911-2129556	8.52611	13.4938	0.662341	0.0019	0.00801155
WAPAL	6:1738421-1795509	26.6687	42.2114	0.662484	0.00055	0.00326589
SF3A1	15:10827348-10840824	14.6842	23.2457	0.662702	0.0001	0.000905426
CS	JH376377.1:46165-49897	25.8685	40.9517	0.662728	0.0008	0.00432192
DGKZ	5:22949352-22992334	19.6021	31.0377	0.663013	0.00045	0.00284262
RNH1	5:15481412-15488239	29.3222	46.4306	0.663081	0.0003	0.00210198
EPSTI1	1:165967143-166019257	28.8494	45.6823	0.663094	0.00105	0.00524103
POLR1B,TTL	3:15341918-15375146	13.2421	20.9696	0.663167	0.0095	0.0256614
N6AMT1	1:103278468-103281539	5.41258	8.57135	0.663206	0.01845	0.0417628
LYN	2:110831286-110878413	32.0143	50.7012	0.663302	0.00075	0.00411848
RFX7	10:7249250-7256715	3.73941	5.92222	0.663328	0.001	0.00507385
LRRK1	10:16971771-17036545	2.66116	4.21518	0.663536	0.00105	0.00524103
MRPL46	10:12667220-12669762	27.142	42.9929	0.663573	0.00055	0.00326589
TTC1	13:7289317-7321357	7.5936	12.0289	0.663648	0.00435	0.0145582
CDK12	27:4158783-4178373	8.59684	13.6185	0.663689	0.0003	0.00210198
NCDN	23:4256434-4263091	3.32495	5.26734	0.663743	0.00145	0.00658988
COG1	18:9258690-9267198	12.0686	19.1198	0.663806	0.0003	0.00210198
CDC2L1	21:2016535-2028646	13.154	20.84	0.663851	0.00025	0.00183995
PFDN2	25:2181543-2183168	70.1692	111.171	0.663876	0.0006	0.00347619
VPS13A	Z:37461215-37565305	3.56174	5.64301	0.663885	0.00045	0.00284262
HSPA9	13:2134784-2156387	107.009	169.569	0.664147	0.0028	0.0106562
NMD3	9:21436128-21447358	1.96799	3.11863	0.664187	0.005	0.0161015
SLC22A15	1:79783605-79814414	8.5745	13.5886	0.664275	0.0029	0.0109265
RPL23A	19:5800726-5803129	534.907	847.754	0.664357	0.0016	0.00708415
GNL2	23:3687860-3698991	7.33116	11.6207	0.66458	0.00045	0.00284262
MSL1	27:4367402-4370640	9.28788	14.7238	0.664731	0.00175	0.00756757
RPA1	19:5418177-5439677	9.28376	14.7181	0.664806	0.00035	0.0023562
ABCA5	18:8232455-8254284	4.03796	6.40188	0.66487	0.0011	0.00543256
ARFGAP1	20:9132389-9148971	11.7484	18.6321	0.665321	0.0005	0.00306562
LAP3	4:75553555-75565346	35.7249	56.662	0.665454	0.00035	0.0023562
PLOD1	21:5514082-5536991	28.4238	45.0849	0.665542	0.00185	0.00786604
TCTN3	6:34835515-34846673	6.50883	10.3251	0.665684	0.0026	0.0101126
ARL4A	2:26933503-26936382	21.9072	34.7521	0.665698	0.0005	0.00306562
EPT1	3:104645876-104668714	46.6507	74.0155	0.665929	0.0014	0.0064302
AZIN1	2:129012894-129038405	17.3041	27.4604	0.666242	0.0003	0.00210198
DNTTIP2	8:12718541-12727305	5.92411	9.40177	0.666334	0.0003	0.00210198
ST7	1:24602261-24730292	8.06743	12.8042	0.666437	0.00115	0.00558968
SLC16A2	4:12269419-12291834	68.3754	108.523	0.666453	0.0009	0.00469705
IGFBP1	2:54998846-55006844	4.849	7.69638	0.666491	0.0031	0.0114401
ZNF511	6:8904185-8908626	11.5579	18.3451	0.666516	0.01355	0.0331721
PXN	15:9417064-9435471	17.8942	28.4044	0.666625	0.0003	0.00210198
YBX1	21:6384969-6392015	335.404	532.414	0.666648	0.00325	0.0118588
GDPD1	19:7206772-7218520	17.8982	28.4131	0.666747	0.0005	0.00306562
SLC24A4	5:43921696-44004214	1.83916	2.91969	0.666769	0.0017	0.00741449
ZBTB5	Z:81452149-81461917	7.85476	12.4696	0.666774	0.0008	0.00432192
F	1:757266-795178	1.2769	2.02713	0.666789	0.0075	0.0217424
NCOA5	20:10950276-10963160	5.14165	8.16308	0.666881	0.00255	0.00998123
DCUN1D3	14:14949848-14956761	5.95696	9.45819	0.666987	0.00615	0.0187993
KIDINS220	3:95445099-95500211	5.19177	8.24334	0.667001	0.00025	0.00183995
NFAT5	11:18415929-18474957	7.96598	12.6485	0.667037	0.00055	0.00326589
ARHGAP25	22:291967-308523	3.33398	5.29394	0.667097	0.0012	0.00575369
RBBP7	1:120801402-120809635	2.51045	3.98632	0.66711	0.01835	0.0416009
FBXL5	4:76205539-76267080	29.3651	46.6362	0.66735	0.0042	0.014248
CCNDBP1	20:7055329-7062553	16.5056	26.2136	0.667361	0.0005	0.00306562
ENSGALG00000001302	9:374492-375359	52.4609	83.3218	0.667453	0.0003	0.00210198
TBL2	JH375211.1:25015-28892	43.045	68.3734	0.66759	0.00055	0.00326589
RABGAP1L	8:7093243-7291205	28.2779	44.9229	0.667777	0.0003	0.00210198
GJA4	23:4398098-4400981	6.78769	10.7836	0.667839	0.0029	0.0109265
EFCAB14	8:20756678-20769440	2.91062	4.62477	0.668053	0.0081	0.0230134
PDXK	1:109396354-109434509	96.1082	152.719	0.668143	0.0004	0.00261006
ENSGALG00000024288	6:8687538-8689635	6.57705	10.4517	0.668225	0.0069	0.0204496
BCAS2,TRIM33	26:3786157-3814324	33.0926	52.5891	0.668253	0.0128	0.0317284
PRPF39	5:58689880-58708951	18.484	29.3745	0.668289	0.0004	0.00261006
HABP2	6:26971703-27037248	495.181	787.039	0.668479	0.0234	0.0499839
GEMIN8	1:122240202-122281715	6.86457	10.9106	0.668495	0.0087	0.0241426
ENSGALG00000006897	5:15411216-15475247	3.77922	6.00759	0.6687	0.0048	0.0156124
ATP5G3	7:16150148-16153215	313.483	498.337	0.668731	0.00065	0.0036944
THBS2	3:40680693-40713177	3.99289	6.34824	0.668923	0.0017	0.00741449
IDH2	10:19519614-19522933	286.721	455.854	0.668928	0.00245	0.00969048
QKI	3:43397389-43529207	49.557	78.793	0.668979	0.0003	0.00210198
BPGM	1:62299225-62318069	2.44417	3.88693	0.669285	0.00225	0.00907145
CLK2	JH375217.1:3644-11246	4.08578	6.49758	0.669291	0.01085	0.0281368
FOXN3	5:42666772-42845899	18.8571	29.9903	0.669389	0.00015	0.00122947
SNED1	9:4388902-4408558	6.2319	9.91162	0.669448	0.00025	0.00183995
MED18	Z:23844695-23846057	17.2795	27.4832	0.66949	0.00165	0.00724511
NOP58	7:11276548-11301132	7.17314	11.4102	0.669645	0.0007	0.00392322
MBNL1	9:22845453-22874966	19.2543	30.6275	0.669648	0.00015	0.00122947
JADE2	13:15085599-15133192	13.5411	21.5417	0.669781	0.0001	0.000905426
ENSGALG00000001536	20:949501-968946	7.83166	12.4595	0.669852	0.0006	0.00347619
LMO4	8:14657095-14677322	13.5931	21.6257	0.669877	0.0035	0.0124786
KANSL1	27:2884723-2934787	8.78217	13.9731	0.669999	0.00055	0.00326589
PHKG1	19:4896317-4901236	47.9013	76.216	0.670031	0.00045	0.00284262
SEMA4B	10:19527618-19535987	16.2139	25.7986	0.670063	0.0004	0.00261006
LAMTOR2	25:161292-163569	72.6501	115.622	0.670379	0.0009	0.00469705
ENSGALG00000021487	5:17624275-17644095	4.58164	7.2917	0.670392	0.0002	0.0015308
ENSGALG00000003691	13:9950958-9991846	6.19816	9.86713	0.670792	0.0005	0.00306562
ANTXRL	6:17454859-17491053	3.57206	5.68734	0.671	0.01215	0.0306175
DNPEP	7:21638776-21682786	32.7183	52.0936	0.671009	0.01605	0.0377799
TBC1D8B	4:17337730-17361318	7.11058	11.3215	0.671027	0.00015	0.00122947
ZNF830	2:85461254-85645076	4.44652	7.07989	0.67105	0.0053	0.0167807
PDE3A	1:65036281-65270875	2.19941	3.50197	0.671052	0.01275	0.0316514
AOAH	2:47255419-47310958	4.15799	6.62106	0.671175	0.00665	0.0199159
VATB	22:1577418-1585818	20.1636	32.1136	0.671429	0.00035	0.0023562
RAVER2	8:27069632-27101820	3.72182	5.92768	0.67146	0.00105	0.00524103
PSMC6	5:58108785-58120487	55.9305	89.0823	0.671505	0.0002	0.0015308
COMMD6	1:154256855-154262613	13.5415	21.5682	0.671514	0.0026	0.0101126
ENSGALG00000021024	10:17269579-17276590	135.373	215.626	0.671593	0.0015	0.00677756
PGM2L1	1:195086449-195120846	1.87805	2.99147	0.671618	0.0231	0.0494879
FAM107B	1:7160121-7169485	5.06231	8.06402	0.671703	0.00065	0.0036944
PDZD2	Z:9316119-9506598	2.55225	4.06645	0.672002	0.00055	0.00326589
CCDC94	AADN03011979.1:6054-9555	7.67119	12.2226	0.672034	0.0066	0.0197966
DCPS	24:417652-436037	9.2907	14.8031	0.672041	0.0062	0.0189175
ARF4	12:8708923-8713617	32.5309	51.8345	0.672103	0.0004	0.00261006
MAP4	2:677525-705016	2.05158	3.26899	0.67211	0.01765	0.0405014
HECTD2	6:19338973-19374354	1.6342	2.60408	0.67219	0.00575	0.0179285
NUP93	11:2038583-2104274	6.36938	10.15	0.672254	0.00065	0.0036944
MOB3A	28:2063504-2067649	23.9681	38.2014	0.672514	0.00065	0.0036944
ENSGALG00000027159	3:49442416-49501611	5.47375	8.72541	0.672693	0.0011	0.00543256
ENSGALG00000027938	JH375695.1:8331-23280	26.6538	42.4963	0.672994	0.00395	0.0136215
AP2A2	5:14460719-14503618	14.8057	23.6079	0.67312	0.00045	0.00284262
C8B	8:24731781-24747335	219.499	350.009	0.673175	0.01345	0.0329687
KDM1A	23:1686689-1716555	12.1552	19.3848	0.67336	0.00035	0.0023562
MED27	17:6336051-6416967	8.73407	13.9291	0.673375	0.0038	0.0132648
ABL2	8:6201089-6218689	3.44267	5.49053	0.673419	0.0012	0.00575369
RNF43	19:516189-561565	7.50692	11.9726	0.67345	0.0027	0.0103805
ENSGALG00000007534	14:12262942-12279972	7.41884	11.8327	0.673519	0.00175	0.00756757
NUP153	2:62119901-62151485	3.85544	6.14948	0.67357	0.00035	0.0023562
TRIO	2:76311200-76496830	6.2903	10.0348	0.67381	0.00025	0.00183995
RPN2	20:5364574-5385541	111.256	177.489	0.673847	0.0014	0.0064302
DNMT1	JH375489.1:20-10786	6.98094	11.1376	0.673942	0.0006	0.00347619
PRICKLE1	1:29596114-29655026	2.47147	3.94315	0.673981	0.00655	0.0197074
ENSGALG00000003332	AADN03025400.1:0-1166	11.6408	18.5736	0.674065	0.0194	0.0433918
RLIM	4:12302383-12315456	15.0863	24.0748	0.674282	0.00055	0.00326589
PPP4R1	2:98346337-98404464	7.95429	12.6939	0.674326	0.0003	0.00210198
C17orf75	18:6699947-6706337	2.57518	4.10961	0.674329	0.00145	0.00658988
SDC4	20:5472059-5486605	10.2383	16.3398	0.674415	0.0112	0.0287951
ZNF609	10:649167-677595	6.23076	9.94458	0.674503	0.00025	0.00183995
AP2M1	9:15293531-15316234	90.9856	145.225	0.674576	0.001	0.00507385
B2M	10:827899-828534	805.279	1285.43	0.674693	0.0011	0.00543256
FLT4	13:12682532-12711218	5.77812	9.22392	0.674779	0.00035	0.0023562
ENSGALG00000000360	23:29154-65025	7.92664	12.6554	0.674973	0.00015	0.00122947
OXSR1	2:4823971-4916752	5.39682	8.61698	0.675073	0.0004	0.00261006
SRPR	24:395901-404137	58.0767	92.7366	0.67518	0.00085	0.00450863
TXLNG	1:120813651-120832181	4.89662	7.81926	0.675247	0.00255	0.00998123
PALD1	6:11096826-11110392	13.2835	21.2121	0.675253	0.00035	0.0023562
DYNC1H1	5:49335863-49377224	41.8823	66.8871	0.675389	0.00635	0.0192494
HMG20B	28:1049764-1054525	13.4125	21.4205	0.675415	0.00075	0.00411848
NDFIP2	1:152236342-152277089	21.0761	33.6618	0.675502	0.00125	0.00591812
GRHPR	Z:81471947-81477206	301.841	482.089	0.675511	0.00125	0.00591812
DDB1	5:412963-426301	36.0259	57.5424	0.675592	0.0006	0.00347619
AKT3	3:34322338-34455636	1.42894	2.28263	0.675755	0.0177	0.0405683
UQCRH	8:20498969-20500444	568.332	907.998	0.675954	0.00095	0.00489457
CTSA	20:10874293-10878191	66.8533	106.812	0.676002	0.00045	0.00284262
DKK3	5:7580063-7602305	12.9363	20.6717	0.676235	0.00085	0.00450863
DPF3	5:25849515-25938558	1.88418	3.01105	0.676329	0.02135	0.0466632
CABLES1	2:102547505-102613612	8.50632	13.5962	0.676597	0.00035	0.0023562
SIAH2	9:23080596-23085345	4.54436	7.26363	0.676613	0.0079	0.0226212
SPOP	27:3147716-3159497	10.1399	16.2095	0.676804	0.00165	0.00724511
RAB11FIP1	22:2219555-2228649	5.31563	8.49758	0.676813	0.0006	0.00347619
SLC7A6OS	11:267995-289201	12.9837	20.756	0.676832	0.01015	0.0268886
TECPR2	5:49502197-49536463	5.52171	8.82816	0.676998	0.00035	0.0023562
SYNJ2	3:51063894-51127835	2.81085	4.49476	0.677235	0.00065	0.0036944
CLTA	Z:51863826-51878606	100.226	160.277	0.677308	0.0004	0.00261006
UBE2E3	7:14019119-14074118	2.2833	3.65169	0.67744	0.00395	0.0136215
Nsl1/DC31	3:21132318-21152781	10.2605	16.4124	0.677684	0.01065	0.0278095
ADGRL3	4:47308220-47790789	1.60628	2.56971	0.677886	0.00485	0.0157356
SYNE2	5:52957671-53114338	8.53415	13.6533	0.677927	0.00135	0.00627457
SBNO1	15:5002523-5026119	12.2334	19.5739	0.6781	0.00015	0.00122947
ANKIB1	2:22639158-22741216	6.15312	9.84562	0.678163	0.0073	0.0213267
SNRPC	26:4248038-4252009	56.1741	89.8853	0.678178	0.00015	0.00122947
TMEM82	21:4223960-4228341	67.2606	107.654	0.678562	0.00045	0.00284262
KRTCAP3	3:104057387-104059799	20.2992	32.4914	0.678635	0.002	0.00835181
ENSGALG00000005720	11:16502525-16512682	9.03079	14.4552	0.678665	0.00105	0.00524103
NLRC5	11:630962-662588	5.75165	9.20662	0.678695	0.00035	0.0023562
THBS1	5:28899074-28914708	10.3958	16.6434	0.678955	0.00045	0.00284262
ATP6V1A	1:78620628-78635559	21.4147	34.2857	0.679005	0.0003	0.00210198
GM2A	13:12330336-12334108	48.5947	77.8025	0.679017	0.00085	0.00450863
MFN2	21:5503596-5513761	15.3586	24.5917	0.679122	0.0003	0.00210198
SRSF11	8:27913699-27925763	15.7558	25.2305	0.679289	0.0002	0.0015308
CRK	19:5162332-5175262	25.3986	40.678	0.679498	0.0003	0.00210198
DDC	2:80708842-80754977	12.4811	19.9904	0.679565	0.00035	0.0023562
NSUN5	19:295539-298397	6.44125	10.3172	0.679642	0.01365	0.0332913
KANSL3	22:2757466-2771602	6.24199	9.99838	0.679688	0.0011	0.00543256
QTRTD1	1:82424530-82455764	7.33417	11.7489	0.679814	0.00455	0.0150635
kif5c	7:34274370-34333241	2.44124	3.91073	0.679823	0.00345	0.0123532
RAB24	13:9531751-9533980	11.2679	18.0513	0.679893	0.00725	0.0212177
KPNA3	1:168573972-168608577	5.87884	9.41813	0.679908	0.00015	0.00122947
ZBTB18	3:34233894-34271885	1.01645	1.62842	0.679932	0.0132	0.0324923
FANCA	11:18225501-18257747	1.22163	1.95719	0.67997	0.01815	0.0412837
TUBB	JH375623.1:12869-15271	76.9867	123.349	0.68007	0.00035	0.0023562
ENSGALG00000027899	4:2093389-2094514	24.5067	39.2723	0.680336	0.00665	0.0199159
PITPNM1	5:77510-85880	2.16873	3.47578	0.680486	0.01115	0.0286855
ACTR2	3:9891301-9907798	26.0397	41.734	0.68051	0.00045	0.00284262
CCND1	5:16827732-16840932	64.2705	103.037	0.680935	0.00045	0.00284262
TSTD2	Z:70595581-70609625	8.57283	13.7446	0.681021	0.0023	0.00921262
RPSA	2:44935745-44940493	674.946	1082.2	0.681123	0.0048	0.0156124
TRMT61A	5:50234280-50253829	4.39382	7.04613	0.681356	0.0209	0.0459981
LCP1	1:167327554-167356169	64.1427	102.863	0.681363	0.00215	0.00878042
RBKS	3:26932710-26997836	19.2682	30.9004	0.6814	0.0008	0.00432192
LASP1	27:4053818-4068552	57.4243	92.0981	0.68151	0.00015	0.00122947
DHX57	3:15894453-15914550	2.0051	3.2159	0.681548	0.0014	0.0064302
HARBI1	5:22803304-22806320	4.82459	7.74098	0.682109	0.0161	0.0378442
PEX7	3:54204621-54237869	8.24464	13.2288	0.682159	0.00555	0.0174305
ZC3H11A	26:467888-481411	15.6471	25.1141	0.6826	0.00045	0.00284262
CEP170B	5:51637377-51687737	5.45035	8.7494	0.682835	0.00015	0.00122947
FIP1L1	4:65345817-65366325	23.1853	37.2217	0.682931	0.00045	0.00284262
FAT1	4:61301848-61399322	13.2502	21.2727	0.682992	0.002	0.00835181
MLXIP	15:5749502-5768970	4.1853	6.71947	0.683016	0.00075	0.00411848
CHD9	11:4503007-4563980	10.0884	16.1981	0.683131	0.00015	0.00122947
ADAMTS2	13:12982379-13153634	6.17517	9.91547	0.683203	0.0002	0.0015308
IBA57	2:2295675-2300126	12.0589	19.3655	0.68339	0.00035	0.0023562
SPEN	21:4260523-4301058	7.09303	11.391	0.683425	0.00035	0.0023562
GOLM1	Z:40626023-40660180	11.8884	19.0929	0.683484	0.00045	0.00284262
OGFOD2	15:5196233-5201551	5.16972	8.30292	0.683532	0.0118	0.0299162
RBPMS	4:34187718-34191329	2.31915	3.72482	0.683576	0.0171	0.0395501
TULP4	3:51191082-51299301	1.04248	1.67453	0.683731	0.01385	0.0336246
THNSL2	4:85515560-85523284	26.4968	42.5624	0.683759	0.0002	0.0015308
NECAP2	21:4385802-4391455	12.2087	19.6131	0.683911	0.00075	0.00411848
MAPRE2	2:107310932-107345428	6.17511	9.92075	0.683985	0.00565	0.017678
RB1	1:168050088-168127185	7.27327	11.6854	0.68403	0.00185	0.00786604
TLR7	1:122856249-122862991	1.21333	1.94941	0.684062	0.01275	0.0316514
ADCK1	5:38657379-38732532	3.17996	5.10944	0.684157	0.0094	0.0254502
ENSGALG00000013765	3:51581744-51590813	3.95351	6.35349	0.684414	0.0015	0.00677756
USP1	8:26391540-26401494	5.3962	8.6722	0.684455	0.00015	0.00122947
NXPE3	1:84773987-84791344	3.41589	5.49005	0.68456	0.0014	0.0064302
BCS1L	7:21965814-21971129	4.94646	7.95044	0.684638	0.0068	0.0202509
NDE1	14:7542920-7555025	4.88746	7.85595	0.684701	0.0028	0.0106562
STX7	3:56146528-56178513	10.8361	17.421	0.684988	0.00045	0.00284262
SARDH	17:7026159-7045384	23.3863	37.6	0.685069	0.0003	0.00210198
CD93	3:3258572-3260939	8.24776	13.2606	0.685072	0.0012	0.00575369
AKAP6	5:34050020-34304671	0.518409	0.833772	0.685563	0.01175	0.0298153
EGLN3	5:34984450-35009673	60.4808	97.2764	0.685613	0.00035	0.0023562
PANK3	13:4053586-4065357	88.0317	141.591	0.685636	0.0003	0.00210198
ENSGALG00000002336	15:2568607-2612666	4.30775	6.92931	0.685775	0.0003	0.00210198
CXXC5	13:496479-503150	4.47149	7.19393	0.686024	0.00085	0.00450863
ADAMTS17	10:16601476-16763501	3.75149	6.03588	0.686101	0.0009	0.00469705
DDX17	1:50734153-50759412	34.9027	56.1592	0.686184	0.0018	0.00770675
SMG6	19:5524383-5615168	4.79479	7.7156	0.68631	0.00035	0.0023562
MRPS26	4:88165874-88171214	31.3692	50.4782	0.686312	0.00035	0.0023562
CAMK2G	6:15124115-15249484	3.10581	4.99877	0.686605	0.0026	0.0101126
HEATR3	11:6117165-6135319	6.38783	10.2815	0.686654	0.00065	0.0036944
PAFAH2	23:3186846-3190095	39.6301	63.7871	0.68667	0.0003	0.00210198
EPHA1	1:76976249-77009699	1.892	3.04561	0.686815	0.0083	0.0233769
RPS8	8:19666356-19670745	811.249	1306.23	0.687197	0.004	0.0137371
PTPRK	3:58029861-58422557	8.78664	14.1486	0.687272	0.0003	0.00210198
TEC	4:66112141-66153920	1.51236	2.43555	0.687452	0.00755	0.0218494
TUBB6	2:97121785-97131304	3.73193	6.0101	0.687465	0.00055	0.00326589
CEP128	5:39942123-40036058	0.774129	1.24671	0.687479	0.01665	0.0387781
HS2ST1	8:14771325-14843445	10.3873	16.7303	0.687646	0.0005	0.00306562
HMGCR	Z:23867093-23880842	101.167	162.953	0.687716	0.003	0.0111877
ENSGALG00000000720	23:1402268-1407058	82.3409	132.634	0.687773	0.0014	0.0064302
AKR1B1L	1:62270796-62290998	9.31639	15.0072	0.687809	0.0051	0.01632
ACA64	14:6135958-6136087	3969.44	6394.24	0.687836	0.00075	0.00411848
SYNGR3	14:6170642-6190153	5.83396	9.39882	0.688005	0.0006	0.00347619
PNISR	3:70910506-70923974	9.96595	16.0558	0.688018	0.0002	0.0015308
ROCK2	3:96746491-96802174	8.79001	14.1621	0.688094	0.00015	0.00122947
ZP1	5:465890-470276	4.50948	7.26605	0.688211	0.0086	0.0239276
PEPD	11:9804381-9925979	53.6222	86.4019	0.688232	0.00025	0.00183995
FAM13A	4:34542532-34656257	7.69375	12.3979	0.688338	0.0002	0.0015308
TMEM115	12:1435836-1439233	23.1084	37.2382	0.688364	0.0001	0.000905426
CRYL1	1:178104768-178156860	23.1139	37.2495	0.688456	0.0001	0.000905426
UBE2G2	9:4667652-4682552	30.3037	48.8365	0.688465	0.00105	0.00524103
CCDC167	3:29507701-29516057	16.9397	27.3005	0.688518	0.00045	0.00284262
CKAP4	1:53861782-53873170	11.4612	18.4714	0.688537	0.0002	0.0015308
UBR5	2:128879367-128946473	15.3923	24.8083	0.68861	0.00045	0.00284262
HEPH	4:277476-299260	7.05494	11.3707	0.688615	0.0002	0.0015308
SMARCA2	Z:26195619-26294557	22.771	36.7031	0.688704	0.00045	0.00284262
SHQ1	12:16445397-16483848	1.76507	2.84512	0.688763	0.0107	0.0278902
NUBP1	14:9098580-9113944	14.7484	23.7748	0.688875	0.0008	0.00432192
FNBP1L	8:12812438-12843013	5.61784	9.05736	0.689075	0.0002	0.0015308
ENSGALG00000027537	JH375214.1:10681-11822	133.186	214.74	0.689154	0.00015	0.00122947
PIGO	Z:8437660-8449236	6.74033	10.8688	0.689296	0.0027	0.0103805
CTNNB1	2:44026722-44048181	159.225	256.802	0.68959	0.0049	0.0158318
C6	Z:12824878-12849014	126.383	203.839	0.689636	0.00455	0.0150635
RP2	1:129557912-129575998	21.3784	34.4819	0.689685	0.0003	0.00210198
STK17B	7:9281020-9299762	2.21442	3.57174	0.6897	0.00255	0.00998123
PAWR	1:39409647-39479066	7.80908	12.5966	0.689807	0.00045	0.00284262
DNAJB4	8:17768602-17774875	7.71396	12.4436	0.689864	0.0014	0.0064302
KATNA1	3:47446106-47459848	4.32998	6.98483	0.689865	0.0041	0.0140146
GLT8D1	12:738123-743596	8.80197	14.1992	0.689908	0.0004	0.00261006
STAB1	12:590127-663481	53.1514	85.7449	0.689943	0.00655	0.0197074
ENSGALG00000007248	10:17162418-17182557	7.8281	12.629	0.690012	0.0006	0.00347619
PDCD2L	11:10624074-10629096	13.9723	22.5418	0.690032	0.0014	0.0064302
INTS4	1:192088909-192121226	8.30433	13.4004	0.690345	0.0002	0.0015308
SMARCE1	27:4481407-4498265	18.0241	29.086	0.690395	0.00015	0.00122947
MS4A15	5:476598-482298	38.4419	62.0429	0.690587	0.0003	0.00210198
ACVR2A	7:34001587-34054530	16.0283	25.8733	0.690847	0.00065	0.0036944
CNOT6L	4:34415666-34425383	11.2947	18.2337	0.69096	0.00035	0.0023562
PELI1	3:9521291-9539167	9.16061	14.7914	0.691238	0.0001	0.000905426
UTRN	3:45215647-45566922	10.1916	16.457	0.691315	0.00085	0.00450863
TRAK2	7:10962319-10980326	5.05946	8.17082	0.691498	0.0005	0.00306562
NSD1	13:9540037-9588985	8.67352	14.0077	0.691528	0.0003	0.00210198
RNASEH1	3:93295104-93301073	8.95991	14.4702	0.691533	0.00115	0.00558968
FAM96A	10:19223717-19224696	22.7118	36.6815	0.691611	0.01795	0.0409484
C9orf3	Z:41334430-41506455	2.40096	3.87808	0.691732	0.0051	0.01632
RSPRY1	11:725082-748442	1.65376	2.67134	0.691815	0.00715	0.0210093
ENSGALG00000027780	AADN03021099.1:1164-5596	10.601	17.124	0.691823	0.01495	0.0355996
DDX55	15:4938112-4948314	3.85392	6.22657	0.692112	0.01765	0.0405014
ABCC10	3:30327548-30359887	1.68388	2.72093	0.69231	0.0013	0.00609065
ZNF148	7:27543246-27573807	3.16222	5.10986	0.692346	0.00225	0.00907145
FURIN	10:19594354-19605113	45.8819	74.1414	0.692353	0.0006	0.00347619
SCARNA3	8:6850113-6977525	3341.45	5400.31	0.692569	0.01425	0.0343175
ITGB5	7:27374148-27415070	25.3115	40.909	0.692627	0.00015	0.00122947
TADA1L	8:4303064-4316854	7.17103	11.5907	0.692714	0.00475	0.0155102
LMO2	5:17708713-17717820	9.5641	15.4615	0.692977	0.0002	0.0015308
EPHB3	9:15437756-15449465	3.14218	5.08051	0.693209	0.0026	0.0101126
ZNF827	4:30663696-30738147	4.16022	6.72664	0.693224	0.00055	0.00326589
HTT	4:81699701-81774162	5.97525	9.66149	0.693247	0.0001	0.000905426
SYNJ2BP	5:26728771-26735600	30.7248	49.68	0.693262	0.0009	0.00469705
TRA2B	9:3895925-3914180	20.475	33.1089	0.693361	0.0003	0.00210198
PES1	15:10785297-10792259	12.8728	20.8191	0.693585	0.00045	0.00284262
ANP32B	28:1712017-1720854	21.5732	34.8958	0.693813	0.0002	0.0015308
PPT1	23:5513920-5518574	27.2486	44.078	0.693873	0.0004	0.00261006
SMDT1	1:49277066-49279093	5.58606	9.03649	0.693932	0.00795	0.0227254
PNPO	AADN03017679.1:20-1300	27.8533	45.0647	0.694146	0.0048	0.0156124
CLUAP1	14:12766347-12821737	3.14736	5.09225	0.694161	0.00825	0.0232922
OCRL	4:1627387-1647378	5.96429	9.65014	0.6942	0.0003	0.00210198
TUBB1	20:11232024-11237042	1.63715	2.64902	0.694267	0.00935	0.0253618
GCN1	15:9441166-9480386	18.234	29.5068	0.694413	0.00035	0.0023562
GALNT2	3:39542263-39630276	9.90609	16.0319	0.694557	0.0003	0.00210198
CAND2	12:19444972-19459421	6.66357	10.7847	0.694626	0.0003	0.00210198
LTBP1	3:30485201-30667659	14.0234	22.6973	0.694677	0.00045	0.00284262
ANKS1A	26:4133854-4213476	6.42682	10.4022	0.694714	0.00015	0.00122947
ZNRF3	15:7788956-7795744	4.84011	7.83405	0.69472	0.00255	0.00998123
RPL23	27:4046905-4048844	780.031	1262.56	0.694748	0.001	0.00507385
Fe	21:6364516-6370549	21.9295	35.4955	0.694762	0.00015	0.00122947
DAPK1	Z:41139676-41233127	5.54413	8.97471	0.694905	0.0007	0.00392322
PGM5	Z:25374949-25442564	1.82436	2.95324	0.694911	0.00585	0.0181434
FAM43A	9:12291915-12293004	13.5448	21.9276	0.695005	0.0067	0.0200194
EDC3	10:1947384-1970111	5.15397	8.3443	0.695105	0.0013	0.00609065
BRT-1	Z:9066146-9077155	43.1679	69.9037	0.695411	0.00025	0.00183995
GFOD1	2:62220225-62283390	6.41672	10.3909	0.695413	0.01085	0.0281368
ZOV3	Z:14595540-14615092	1.53797	2.49108	0.695739	0.00325	0.0118588
XPO7	22:1343626-1375329	19.4641	31.5295	0.695886	0.00025	0.00183995
NUP107	1:35208344-35233387	9.03247	14.6322	0.695956	0.0001	0.000905426
CFD	28:2751171-2753071	470.883	762.82	0.695974	0.00115	0.00558968
ENSGALG00000004908	4:1950341-1960665	16.4902	26.714	0.695987	0.0003	0.00210198
DHX37	15:4490045-4501939	4.13631	6.70079	0.695987	0.00045	0.00284262
MRGBP	20:8671064-8675057	12.7289	20.622	0.696075	0.004	0.0137371
IKBKE	26:2417504-2427240	5.4304	8.79889	0.696265	0.0029	0.0109265
TMF1	12:15279476-15292132	11.4509	18.5544	0.696302	0.0002	0.0015308
TSPAN6	4:5155345-5162094	21.2651	34.4573	0.69632	0.0002	0.0015308
ASH2L	22:2256514-2266815	8.46279	13.7131	0.69635	0.00015	0.00122947
ACOX2	12:11822674-11836270	80.377	130.251	0.69644	0.0005	0.00306562
ENSGALG00000027553	AADN03010133.1:20-6471	4.07406	6.60226	0.696493	0.00555	0.0174305
XPO5	3:30239236-30266867	9.60673	15.5695	0.696606	0.0001	0.000905426
ATRX	4:12768458-12843495	8.27266	13.4096	0.696844	0.0002	0.0015308
ST6GALNAC4	17:4870176-4871635	7.01796	11.3778	0.697103	0.00975	0.0261073
ZMAT2	13:351065-377641	42.4233	68.7795	0.697123	0.00435	0.0145582
MCM4	2:107695681-107707788	5.3767	8.7171	0.697127	0.00075	0.00411848
HMGCS2	8:4229377-4233158	567.825	920.712	0.697304	0.0052	0.0165583
DHX40	19:7262867-7276766	7.31917	11.8679	0.697312	0.0002	0.0015308
SMG1	14:8324362-8383242	10.514	17.0487	0.697355	0.00055	0.00326589
ZC3H18	11:17853539-17887022	4.51513	7.32178	0.697429	0.0009	0.00469705
C5H11ORF58	5:10948694-10953363	63.2769	102.622	0.697585	5e-05	0.000514991
YWHAE	19:5189880-5200203	62.3061	101.048	0.697591	5e-05	0.000514991
PSAP	6:11510432-11530618	384.994	624.385	0.697599	0.0222	0.0480356
DPT	1:83312662-83339889	3.83999	6.22778	0.697614	0.0041	0.0140146
HN1L	14:13686796-13691868	5.91023	9.58547	0.697636	0.0124	0.0310932
ZBTB8OS	23:5174849-5179312	10.9949	17.8344	0.697831	0.00075	0.00411848
POLD2	JH376336.1:3301-6442	10.8253	17.5599	0.697875	0.0016	0.00708415
KCNQ5	3:80962160-81225706	0.518712	0.841424	0.697897	0.0202	0.0447866
PAM16	14:12692323-12694121	83.7379	135.836	0.697919	0.00015	0.00122947
PNPLA7	17:1584445-1699751	22.227	36.0596	0.698071	0.00015	0.00122947
SGCD	13:10842857-11150740	1.50845	2.44763	0.698324	0.01345	0.0329687
DCTN2	JH375605.1:20-2073	15.6648	25.4204	0.698463	0.00335	0.0121139
DNASE1L3	12:8921004-8924545	35.916	58.2871	0.698551	0.0002	0.0015308
ENSGALG00000017180	1:181451102-181589260	1.14318	1.85541	0.698679	0.0002	0.0015308
PKN2	8:14118085-14145849	9.11194	14.7893	0.698728	5e-05	0.000514991
PXDC1	2:66151792-66174842	14.2573	23.1413	0.698771	0.00015	0.00122947
CTNNA1	13:1960515-2068702	57.6556	93.5841	0.698803	0.00015	0.00122947
ENSGALG00000027143	2:482597-491135	6.24251	10.1329	0.698854	0.00025	0.00183995
MICU2	1:177658310-177792858	13.3677	21.699	0.698883	0.0003	0.00210198
ASXL1	20:10505807-10517025	2.7988	4.54335	0.69895	0.0006	0.00347619
CC2D1B	8:23246833-23275593	11.3551	18.4332	0.698966	0.0003	0.00210198
DYM	Z:1086905-1235586	9.22394	14.9749	0.699096	0.00015	0.00122947
NUP88	19:3436726-3445243	21.8027	35.3988	0.699192	5e-05	0.000514991
ZNF710	10:19515260-19518020	7.19797	11.6898	0.699587	0.0027	0.0103805
THOC3	13:9758550-9762048	11.6153	18.8639	0.699595	0.0011	0.00543256
ENSGALG00000022570	25:452668-458076	49.6031	80.559	0.699617	0.0002	0.0015308
TNKS	4:48794272-48900800	8.24778	13.396	0.699728	0.0002	0.0015308
PDGFRB	13:12566518-12588276	14.0418	22.8072	0.699764	0.00035	0.0023562
WDR91	1:47762313-47777315	7.71351	12.5289	0.699805	0.00025	0.00183995
KIF26A	5:50610381-50708576	1.29697	2.10694	0.700005	0.0013	0.00609065
OPHN1	4:477512-523754	2.58461	4.19909	0.700131	0.00215	0.00878042
EDA	4:1099069-1170405	16.5304	26.8581	0.700233	0.00045	0.00284262
NOC4L	15:2557168-2567628	10.9019	17.7138	0.7003	5e-05	0.000514991
REST	4:48626469-48637170	10.093	16.4003	0.700371	0.00015	0.00122947
UPF2	1:6081853-6134287	5.18363	8.42311	0.700389	0.00015	0.00122947
CYP1A4	10:1943038-1946669	19.8908	32.3216	0.700398	0.00165	0.00724511
MEF2BNB	28:3342691-3351021	9.04027	14.6909	0.700486	0.0012	0.00575369
ENSGALG00000012753	AADN03014805.1:2661-7407	3.16419	5.14198	0.70049	0.00615	0.0187993
KLF2	28:4146805-4149435	3.0797	5.00468	0.700491	0.01045	0.0274406
CSF1R	13:12594406-12611465	37.4461	60.8528	0.700509	0.00025	0.00183995
BMPR1A	6:2035726-2074031	7.39922	12.0251	0.700605	0.00055	0.00326589
RAB11FIP2	6:29003776-29047647	6.26819	10.1889	0.700877	0.0004	0.00261006
TYW5	7:10520366-10525940	3.75324	6.1017	0.701074	0.0213	0.04658
PAN2	JH376377.1:52406-63375	4.34571	7.06509	0.701115	0.00085	0.00450863
TSPAN18	5:21455062-21473619	6.20721	10.0918	0.701167	0.023	0.0493642
CACYBP	8:7076888-7085828	16.7758	27.2773	0.701321	0.00725	0.0212177
CEP350	8:5983721-6035303	7.11987	11.5777	0.701426	0.0002	0.0015308
IFT140	14:13740762-13819382	2.90197	4.71935	0.701555	0.01995	0.0443755
CETN2	4:11242848-11246561	11.9979	19.5132	0.70167	0.00575	0.0179285
UQCR11	28:2372739-2374636	318.335	517.791	0.701826	0.0003	0.00210198
ENSGALG00000004931	2:564029-564628	39.2346	63.8188	0.701857	0.00075	0.00411848
TUBB2B	2:66367677-66370171	4.53613	7.37845	0.701857	0.01175	0.0298153
ARL8A	26:342277-351381	13.579	22.0891	0.701959	0.00095	0.00489457
RPUSD1	14:5982461-5985848	3.39505	5.5228	0.701964	0.0119	0.0301109
GAK	Z:53195969-53242965	5.87536	9.5585	0.702107	0.0003	0.00210198
TOP2B	2:38420563-38482069	10.8283	17.6168	0.70215	5e-05	0.000514991
TSHZ2	20:12972362-13104953	1.25679	2.04473	0.702167	0.0125	0.0312366
BTBD2	28:2090320-2093906	13.2373	21.5374	0.702235	0.00495	0.0159669
MDM2	1:35255809-35267006	11.0815	18.0338	0.702557	0.0003	0.00210198
TAF5L	3:39412902-39427750	7.1731	11.6743	0.702663	0.00095	0.00489457
PPP2R5E	5:53222587-53285821	3.06359	4.98619	0.702716	0.0183	0.0415279
EIF2B3	8:19722266-19816144	6.78675	11.0463	0.702765	0.00115	0.00558968
YLPM1	5:37315711-37349907	3.58631	5.83747	0.702843	0.0003	0.00210198
GTPBP2	3:30218460-30228676	6.13323	9.9852	0.703145	0.0002	0.0015308
PPP2R5A	3:21292199-21332399	31.8877	51.9271	0.703488	0.0002	0.0015308
NBEAL2	2:3841474-3864815	6.6759	10.8715	0.703523	0.00015	0.00122947
KDF1	23:1825481-1830175	4.20729	6.85327	0.703902	0.00945	0.0255559
PEX5	1:76914599-76923832	35.7219	58.188	0.703915	0.00015	0.00122947
PDZD11	4:1245211-1248460	6.00356	9.77992	0.704005	0.00085	0.00450863
SDCBP	2:111749346-111804172	36.1501	58.8898	0.704018	0.0018	0.00770675
NCAPH	22:2937123-2946362	1.56844	2.55504	0.704021	0.0168	0.0390263
QARS	12:11581870-11586359	27.937	45.5184	0.704273	0.0002	0.0015308
METTL16	1:78850415-78861364	5.47648	8.92354	0.704366	0.0005	0.00306562
ANKRD10	1:138575360-138610423	2.05736	3.35267	0.704515	0.0053	0.0167807
CDKL5	1:119936877-120009401	2.21862	3.61701	0.705137	0.00315	0.0115625
ENSGALG00000004676	12:3293873-3295013	4.5026	7.34084	0.705187	0.02215	0.0479718
GSN	17:8409619-8422622	17.8624	29.1223	0.705194	0.0002	0.0015308
ACTN1	5:27492490-27573996	20.5993	33.5906	0.705465	0.00055	0.00326589
PTPRF	8:18794147-19051645	17.1716	28.0025	0.705528	0.0002	0.0015308
ENSGALG00000024355	28:2368476-2369243	10.1239	16.5116	0.705705	0.02285	0.0491054
SNX22	10:807605-809314	16.3602	26.6827	0.705716	0.00155	0.00694705
PSMB4	25:2086671-2089191	112.635	183.705	0.705734	0.0003	0.00210198
SEL1L	5:40218336-40245761	24.9589	40.7134	0.705947	0.0002	0.0015308
ENSGALG00000015468	3:70838291-70841158	7.04806	11.4989	0.706202	0.007	0.0206987
ENSGALG00000021397	Z:72863014-72869682	96.6915	157.755	0.706223	0.00035	0.0023562
FSCN1	14:4184406-4190617	9.90532	16.1632	0.706436	0.00145	0.00658988
KIAA1671	15:6968227-6991911	23.3011	38.0233	0.706486	0.00045	0.00284262
ERO1L	5:58090553-58108522	3.41691	5.57583	0.706494	0.0058	0.0180266
NOC2L	21:2867441-2916830	8.8787	14.4889	0.706526	0.00025	0.00183995
IRF6	26:3108077-3115112	16.5086	26.9405	0.706565	0.00015	0.00122947
MIEF1	1:50471898-50476965	8.19365	13.3725	0.706687	0.003	0.0111877
MYO1E	10:6234432-6311306	4.51833	7.37482	0.706819	0.0003	0.00210198
RFXAP	1:171711511-171717479	5.38238	8.78527	0.706843	0.00365	0.0128603
ENSGALG00000023773	3:4507632-4768286	10.1112	16.5047	0.706923	0.00145	0.00658988
ARHGEF11	AADN03010962.1:560-9754	9.54075	15.5756	0.707114	0.0002	0.0015308
BASP1	2:75347265-75348000	121.478	198.32	0.70714	0.0001	0.000905426
MAGI1	12:13983651-14275283	14.9044	24.3342	0.707245	5e-05	0.000514991
IST1	11:19166597-19173788	39.4784	64.4597	0.707332	5e-05	0.000514991
PHTF2	1:12251575-12314104	1.4184	2.31596	0.707349	0.01395	0.0338112
NPLOC4	18:9427606-9455396	14.3855	23.4904	0.707454	0.00025	0.00183995
VPRBP	12:2221687-2270861	9.33911	15.2513	0.707572	5e-05	0.000514991
SPG7	AADN03020457.1:852-26882	39.9542	65.2476	0.70758	0.00015	0.00122947
BUD13	24:5088799-5094760	3.58085	5.84796	0.707632	0.0035	0.0124786
TBCCD1	9:3852390-3860765	6.25803	10.2202	0.707649	0.00185	0.00786604
ENSGALG00000027854	17:5339821-5350792	8.71213	14.2306	0.707897	0.00015	0.00122947
L3MBTL2	1:49616379-49630975	4.53642	7.41128	0.708167	0.00125	0.00591812
HERC1	10:3433413-3528542	32.2406	52.6778	0.708313	0.0025	0.00983496
ADAM9	22:2428340-2443106	8.57398	14.0106	0.708481	0.00015	0.00122947
SERINC2	23:609367-615466	6.68397	10.9226	0.70854	0.004	0.0137371
FNIP2	4:21425882-21496063	16.0512	26.2315	0.708619	5e-05	0.000514991
AGPAT2	17:7737253-7744146	64.9794	106.198	0.708697	0.0003	0.00210198
SCAMP3	JH375217.1:201-1990	12.2012	19.9417	0.708757	0.0119	0.0301109
MDN1	3:74853140-74946896	6.07251	9.927	0.709063	0.0001	0.000905426
TCF21	3:55546607-55552571	1.75597	2.87059	0.709078	0.0022	0.00893153
MBSP	1:39497292-39614667	5.36372	8.76886	0.709155	5e-05	0.000514991
RIL	13:16109314-16143167	2.3157	3.78644	0.709396	0.0026	0.0101126
HYAL1	12:1406253-1408151	3.70177	6.05284	0.709397	0.0206	0.0455008
RAB35	15:9484623-9499978	6.34353	10.3744	0.709666	0.0001	0.000905426
UNC5C	4:58208188-58447378	3.67359	6.00788	0.709667	0.0017	0.00741449
CD151	5:15037217-15068612	43.447	71.0627	0.709836	0.00015	0.00122947
GPR157	21:3252440-3261217	9.58584	15.6791	0.709867	0.0012	0.00575369
GATAD2B	JH375653.1:1547-15040	2.88569	4.72068	0.710076	0.00815	0.0230713
RDM1	27:1611795-1616617	3.06829	5.01957	0.710132	0.01925	0.0431472
ENSGALG00000007703	4:12130083-12158495	15.4875	25.3399	0.710303	0.00015	0.00122947
TBC1D9B	13:12759005-12776256	23.0127	37.6525	0.710311	0.00015	0.00122947
FAM114A2	13:11594585-11604737	5.9439	9.7255	0.710363	0.00025	0.00183995
RNF166	11:17900343-17906187	7.18287	11.7529	0.710383	0.00015	0.00122947
PUS1	15:2614989-2619543	5.44867	8.91581	0.710463	0.00045	0.00284262
ANKRD44	7:9559011-9626849	7.77551	12.7261	0.710778	0.00045	0.00284262
YIPF3	3:30271305-30276362	32.1636	52.6435	0.710827	5e-05	0.000514991
ANKRD17	4:50153706-50226185	11.9414	19.546	0.710904	0.0001	0.000905426
ENSGALG00000005204	15:8101743-8107045	72.6791	118.972	0.711005	0.00025	0.00183995
QSER1	5:5633003-5667607	4.72679	7.73773	0.711051	0.0001	0.000905426
dCK	4:49546674-49559671	1.04975	1.71854	0.711132	0.00905	0.0248073
AHSA1	5:38509974-38515589	29.9057	48.9589	0.71115	0.0001	0.000905426
LETM2	22:2321652-2327164	2.67291	4.37595	0.711185	0.0207	0.0456784
PRKD3	3:32882990-32920634	5.50621	9.01631	0.711478	0.0004	0.00261006
CUX1	19:3879652-4085026	9.53017	15.6066	0.711579	5e-05	0.000514991
ACAP2	9:12171477-12231009	4.10498	6.72229	0.711579	0.00105	0.00524103
DSG2	2:105785434-105800639	10.4725	17.1509	0.711679	0.0001	0.000905426
HIST1H111R	1:48033616-48034276	50.6123	82.9054	0.711978	0.0003	0.00210198
GRK4	4:81780293-81810730	2.0379	3.33854	0.712134	0.01005	0.0267025
PARD3B	7:12338383-12612881	4.63212	7.58867	0.712173	0.00035	0.0023562
SYNM	10:16360038-16376937	2.05587	3.3682	0.712223	0.0004	0.00261006
NID2	5:57989688-58008203	16.1054	26.386	0.712225	0.0002	0.0015308
GSTCD	4:38057433-38119998	2.2517	3.68919	0.712291	0.0021	0.0086549
KDM4A	8:19055969-19077198	12.2592	20.0882	0.712479	0.00025	0.00183995
SASH1	3:46930246-47049931	5.96159	9.77107	0.71282	0.00015	0.00122947
CDC42EP3	3:31128988-31129744	7.92543	12.9913	0.712984	0.00745	0.021635
CEP112	18:7734529-7871420	2.49346	4.0874	0.713037	0.0014	0.0064302
MITF	12:15468611-15557117	2.8937	4.74449	0.713338	0.0004	0.00261006
SLC29A1	3:29637258-29654613	5.33823	8.75253	0.713339	0.00285	0.0107903
DMAP1	8:19322793-19349025	7.17208	11.7599	0.713414	0.00105	0.00524103
HNRNPK	Z:39936509-39954264	44.9729	73.7429	0.713448	0.0001	0.000905426
HYOU1	24:5669909-5683409	57.8227	94.8168	0.713507	0.00075	0.00411848
MAN1C1	23:2257730-2299072	16.7744	27.5096	0.713669	0.00025	0.00183995
ASPSCR1	18:4978169-5018359	5.24523	8.60282	0.713803	0.00015	0.00122947
MKRN1	1:56931061-56952880	46.9869	77.0666	0.713845	0.00015	0.00122947
RFTN2	7:9753088-9778093	2.06425	3.38593	0.713931	0.0071	0.0208992
IFT80	9:21661986-21703750	19.0092	31.1849	0.714153	0.00015	0.00122947
PTPN9	10:2181147-2186049	9.0003	14.7672	0.71435	0.0011	0.00543256
RNF113A	27:2775141-2781204	3.81956	6.26698	0.714363	0.01405	0.0339619
TIMP2	18:10040656-10047611	137.186	225.115	0.714527	0.0001	0.000905426
GPD2	7:35565239-35605889	4.8592	7.97411	0.714606	0.0009	0.00469705
ADGRA2	22:2203022-2212432	2.09189	3.43299	0.714655	0.00515	0.0164395
MTRF1	1:165172542-165185717	12.8441	21.0785	0.714666	0.0002	0.0015308
SRGN	6:10403301-10408400	34.3708	56.4115	0.714806	0.005	0.0161015
MYST2	27:3080954-3092426	5.16873	8.48342	0.714837	0.0002	0.0015308
INPP5D	9:635538-681983	5.87931	9.65023	0.714915	0.00025	0.00183995
ENSGALG00000019837	16:225232-229543	16.7662	27.5246	0.715162	0.0007	0.00392322
HDAC8	4:1858231-1866719	23.7964	39.0702	0.715328	0.0001	0.000905426
AGO1	23:4139609-4151896	9.32151	15.3048	0.715351	0.00015	0.00122947
DLST	5:37370863-37384872	60.8133	99.8517	0.7154	0.0001	0.000905426
CCDC15	24:219316-234248	4.01513	6.59265	0.715412	0.0075	0.0217424
RASSF2	22:413641-425903	6.08573	9.99313	0.715506	0.0004	0.00261006
G3BP1	13:12202077-12223167	30.9696	50.8585	0.715636	0.0002	0.0015308
ENSGALG00000028082	AADN03012381.1:20-4640	87.2282	143.284	0.716007	0.0029	0.0109265
MLLT4	3:41393867-41474285	10.8118	17.76	0.716019	5e-05	0.000514991
RSU1	2:19881821-19979217	16.9064	27.7765	0.716296	0.0002	0.0015308
NDOR1	17:951104-967412	5.76403	9.47015	0.716311	0.00415	0.0141194
MRPL10	27:3899702-3901657	33.5899	55.1887	0.716348	0.0001	0.000905426
ACTG1	10:2014376-2015913	33.7283	55.4282	0.716664	5e-05	0.000514991
UBE4A	24:4392699-4567637	24.9744	41.0432	0.716692	0.00785	0.0225167
TNFAIP8L1	28:4703153-4710012	6.18466	10.1653	0.716886	0.00385	0.0133674
YTHDF1	20:9050993-9061845	6.39043	10.5045	0.717018	0.00075	0.00411848
TRAF7	14:6408714-6437326	16.9195	27.8153	0.717186	0.0001	0.000905426
SMN	Z:72857069-72862718	4.95477	8.14639	0.717342	0.0028	0.0106562
KIAA1191	13:9742537-9750247	7.1721	11.7923	0.717377	0.00055	0.00326589
SWAP70	5:8719683-8750570	5.07867	8.35047	0.717407	0.001	0.00507385
FAM192A	11:706764-714342	18.2839	30.064	0.71746	0.00035	0.0023562
WDR18	28:2792875-2804410	4.06415	6.68323	0.717593	0.0059	0.0182548
RNF10	15:9256505-9274697	31.7851	52.2687	0.717595	0.0003	0.00210198
DISP3	21:5721499-5736965	1.36404	2.24334	0.717763	0.014	0.0338902
SNRNP27	22:2954542-2956363	14.8304	24.3954	0.718051	0.00065	0.0036944
LAPTM5	23:267868-281554	74.5393	122.636	0.718304	5e-05	0.000514991
APLP2	24:1437733-1460236	80.9878	133.26	0.718464	0.00125	0.00591812
TEL	1:71620385-71749352	10.5675	17.3881	0.718465	0.0004	0.00261006
ENSGALG00000026562	JH375512.1:39423-42140	6.49361	10.6853	0.71853	0.01085	0.0281368
IFT52	20:3973500-3984095	5.93824	9.77142	0.718534	0.00205	0.00849982
MAPK14	26:134235-155389	13.2521	21.8107	0.718815	0.00035	0.0023562
NIT2	1:84256503-84262957	31.6309	52.0714	0.719154	0.0002	0.0015308
CWC15	1:184726716-184741355	33.666	55.4303	0.719385	0.0001	0.000905426
HDLBP	9:4446506-4467274	243.743	401.336	0.71945	0.0138	0.033559
GPATCH8	27:1526870-1550131	6.45851	10.6348	0.719519	0.0003	0.00210198
TAX1BP3	19:6641420-6644023	8.88582	14.6385	0.720187	0.0001	0.000905426
ENSGALG00000028740	AADN03010626.1:8683-19389	2.13412	3.51628	0.720411	0.0032	0.0117129
PGAM5	15:1408217-1413625	14.7353	24.2817	0.72059	0.00015	0.00122947
SULT1E1	4:51214006-51215578	103.817	171.096	0.720762	0.00015	0.00122947
PCYT2	18:10223920-10233484	80.282	132.323	0.720917	0.0003	0.00210198
NKIRAS2	27:4758781-4759794	27.2829	44.9705	0.720983	0.0024	0.00953469
RANBP1	15:1300824-1308189	8.49292	13.999	0.720996	0.0132	0.0324923
SF3A3	23:3472846-3479739	14.8818	24.5301	0.721005	5e-05	0.000514991
NFKB1	4:60395341-60452343	5.12863	8.4539	0.721042	0.0003	0.00210198
FAM49A	3:99136708-99173961	7.6516	12.6129	0.721067	5e-05	0.000514991
CD247	1:90968880-91015270	3.36525	5.54734	0.721083	0.0098	0.0262171
DNTTIP1	20:10849413-10853705	12.68	20.9066	0.721411	0.00095	0.00489457
EIF4A3	3:15762717-15769245	49.5823	81.7514	0.721416	0.0002	0.0015308
CENPE	4:60597387-60634806	1.10021	1.81414	0.721509	0.00035	0.0023562
ENTPD7	6:21651670-21655392	5.40286	8.91003	0.721706	0.00665	0.0199159
RALGAPA2	3:3636163-3748186	3.43203	5.66025	0.721803	0.00015	0.00122947
DPP9	28:4673751-4692777	7.67432	12.6605	0.722221	0.0001	0.000905426
KLHL28	5:58742901-58750216	6.83276	11.2725	0.722263	0.0013	0.00609065
LIG1	LGE64:715792-722552	2.38541	3.93579	0.722417	0.0073	0.0213267
AIMP1	4:37847834-37861897	12.7151	20.981	0.722537	0.00065	0.0036944
MXI1	6:25366992-25409141	7.59002	12.5247	0.722598	0.0059	0.0182548
SACS	1:176842565-176900914	1.17716	1.94252	0.722622	5e-05	0.000514991
NSDHL	4:11231921-11242461	55.2727	91.2227	0.722825	0.00025	0.00183995
ENSGALG00000004341	8:6585941-6591317	8.96919	14.8035	0.722892	0.0022	0.00893153
ENSGALG00000021174	24:6249881-6274575	9.8068	16.1911	0.723346	0.0007	0.00392322
TOR4A	17:1798820-1801316	13.7721	22.7381	0.723361	0.00015	0.00122947
TAF11	26:4214175-4217459	6.58029	10.8651	0.723479	0.00385	0.0133674
IL34	11:1707757-1713030	10.0396	16.5774	0.723518	0.0008	0.00432192
ASB1	7:6002321-6011953	8.30507	13.7137	0.723552	0.0096	0.0258479
PLXNC1	1:44935662-45003163	12.4204	20.5124	0.723778	5e-05	0.000514991
ENSGALG00000021830	2:55449411-55452927	7.3944	12.2162	0.724287	0.0106	0.0277037
SRFBP1	Z:80739170-80799325	1.3094	2.16327	0.724304	0.0019	0.00801155
EEA1	1:44497301-44562796	7.19382	11.8864	0.724483	0.0001	0.000905426
HHEX	6:20253582-20257076	61.3362	101.36	0.724685	0.0001	0.000905426
WWC2	4:39331593-39416540	13.072	21.6032	0.724763	0.00015	0.00122947
ATP13A2	21:4414088-4422658	10.391	17.1729	0.724793	0.0002	0.0015308
ENSGALG00000007434	14:11971380-11995106	7.18735	11.8798	0.724981	0.0019	0.00801155
RBMX2	4:1544391-1546091	14.3503	23.7216	0.725119	0.0005	0.00306562
SEC23IP	6:29905637-29921730	8.27014	13.671	0.72513	5e-05	0.000514991
IGHMBP2	5:1452079-1495209	4.65745	7.70057	0.725426	0.00075	0.00411848
RABEP1	19:3448922-3488977	19.0447	31.4952	0.725742	5e-05	0.000514991
CRYZL1	1:104821194-104842243	3.75098	6.20324	0.725755	0.00485	0.0157356
KLHDC4	11:17380192-17407856	7.73225	12.7878	0.725804	0.0004	0.00261006
ENSGALG00000028079	AADN03026978.1:29-9728	5.95025	9.84115	0.725877	5e-05	0.000514991
H2AFZ	4:59764349-59766622	48.4335	80.1053	0.725892	5e-05	0.000514991
BZW2	2:28608916-28661135	13.362	22.0998	0.725905	0.0001	0.000905426
HTRA1	6:30810572-30839263	22.6895	37.5331	0.72614	5e-05	0.000514991
DSTYK	26:1967744-1987562	4.0927	6.77162	0.726446	0.00065	0.0036944
ETFA	10:2858653-2989154	53.2017	88.0319	0.726554	0.001	0.00507385
ENSGALG00000026188	14:12104177-12121865	6.23254	10.3131	0.726588	0.00015	0.00122947
DNAJA4	10:3237427-3243990	8.75727	14.4911	0.726617	0.00025	0.00183995
GMIP	JH376279.1:70610-89346	1.87207	3.09786	0.726641	0.0012	0.00575369
AFMID	18:10139264-10142673	107.422	177.771	0.726732	5e-05	0.000514991
KIAA0100	19:5752341-5765381	8.29507	13.7289	0.726891	0.0001	0.000905426
42431	28:815693-827123	10.6591	17.6425	0.726964	0.00765	0.022084
CLIC2	4:1801656-1806508	14.2297	23.5529	0.727	0.0002	0.0015308
ENSGALG00000009104	1:24064035-24111623	0.676011	1.11895	0.727034	0.0048	0.0156124
DENND2C	26:3814480-3828825	1.35773	2.24759	0.727179	0.0155	0.0367221
HSP90AB1	3:29630921-29636756	7.08578	11.73	0.7272	0.00035	0.0023562
FUK	11:1757520-1767364	8.75201	14.4888	0.727255	0.0009	0.00469705
NFKBIA	5:35468939-35506004	7.46533	12.3589	0.727278	0.00015	0.00122947
EphA2	21:4318354-4326236	2.0219	3.34729	0.727284	0.0117	0.0297078
ENSGALG00000010072	21:6769201-6788169	22.538	37.3136	0.727343	5e-05	0.000514991
INTS3	25:650384-684289	7.08407	11.7287	0.727394	0.0005	0.00306562
CCDC43	27:1236373-1244170	4.88927	8.09529	0.727464	0.00145	0.00658988
CYB5D2	19:3204783-3208739	10.8653	17.9943	0.727814	0.0006	0.00347619
XPNPEP1	6:25219898-25248494	16.443	27.2323	0.727844	0.0001	0.000905426
MN1	15:7488964-7521455	1.90655	3.15767	0.727898	0.01815	0.0412837
SLC30A7	8:10689870-10711514	25.5066	42.2489	0.728043	0.00015	0.00122947
WNK4	27:5039149-5051893	2.73336	4.52752	0.728043	0.00085	0.00450863
SDF2L1	15:374427-380234	11.9136	19.7362	0.728234	0.0001	0.000905426
UNC13D	18:4625298-4635526	3.02934	5.01903	0.728408	0.0038	0.0132648
KIAA0930	1:70394228-70462643	8.73934	14.4812	0.728584	0.00025	0.00183995
NRBP2	2:148759824-148774588	8.15117	13.5069	0.728621	0.0002	0.0015308
MPDZ	Z:30816003-30916541	2.51155	4.16203	0.72871	0.0003	0.00210198
KIF11	6:20272560-20290598	2.04799	3.3939	0.728736	0.0004	0.00261006
ENSGALG00000023472	11:18192069-18194173	11.9991	19.885	0.728755	0.0071	0.0208992
ARRDC4	10:15958077-15967730	5.92843	9.82484	0.728783	0.0001	0.000905426
TXN	Z:66343848-66349205	454.988	754.161	0.729043	0.0006	0.00347619
PLEKHM3	7:11536103-11616253	5.19447	8.61017	0.729066	0.001	0.00507385
CHMP6	18:9620080-9622486	23.6418	39.188	0.729073	0.0011	0.00543256
UXS1	1:134781802-134837592	2.33713	3.87422	0.729169	0.00315	0.0115625
BAZ1A	5:35253579-35299381	7.90231	13.1021	0.729456	0.00015	0.00122947
TSEN54	18:11155142-11164638	7.09534	11.7644	0.729483	5e-05	0.000514991
LARP4	LGE22C19W28_E50C23:218463-229189	36.8434	61.0986	0.729736	5e-05	0.000514991
GJA5	1:91781763-91800664	2.24286	3.71966	0.729832	0.00645	0.0194918
42620	2:47490086-47544695	33.3289	55.2784	0.729944	0.0001	0.000905426
TTC7A	3:26292214-26454063	4.45041	7.38184	0.730044	0.0001	0.000905426
ENSGALG00000003492	22:2595986-2596853	19.6533	32.6005	0.730123	0.0006	0.00347619
TCF25	11:18267772-18286192	26.2204	43.4941	0.730132	5e-05	0.000514991
RAPGEF1	17:6242166-6318608	4.71106	7.8147	0.730138	0.00015	0.00122947
IAH1	3:95780306-95783845	17.1163	28.3931	0.730166	0.00035	0.0023562
NET1	1:1088059-1099472	14.1696	23.5064	0.730255	0.00015	0.00122947
YWHAH	15:8822952-8831280	8.03962	13.342	0.730777	0.00035	0.0023562
CLMN	5:45165016-45184249	12.4509	20.663	0.730803	0.0001	0.000905426
MIEF2	14:5069731-5074014	4.42616	7.34605	0.730913	0.0011	0.00543256
SLC25A22	5:15182221-15202961	32.0604	53.2134	0.731	5e-05	0.000514991
DMXL2	10:8763458-8813670	3.01328	5.00144	0.73101	0.0001	0.000905426
CALM	3:26488767-26495658	189.342	314.318	0.731231	5e-05	0.000514991
POLR3H	1:49458573-49465331	4.70267	7.80739	0.731361	0.00105	0.00524103
S100A10	25:2167012-2167332	266.646	442.842	0.731867	0.004	0.0137371
SYNE1	3:48447031-48720659	1.91955	3.18897	0.732325	0.0001	0.000905426
APOA5	24:5099631-5101703	213.7	355.107	0.732668	0.00035	0.0023562
CALD1	1:62400841-62587151	10.7068	17.793	0.732787	0.00015	0.00122947
CAPSL	Z:10767468-10772029	55.484	92.215	0.732929	0.00075	0.00411848
CRMP2A	22:460056-501407	9.68081	16.0896	0.73293	0.0003	0.00210198
PCYT2	18:10233634-10238009	8.82869	14.6758	0.733167	0.00135	0.00627457
ZSWIM8	6:15388338-15449462	6.78802	11.2842	0.733242	0.0001	0.000905426
ETS1	24:875644-941433	26.4796	44.0201	0.733279	5e-05	0.000514991
MCAM	24:4206158-4214569	24.9629	41.5004	0.733341	5e-05	0.000514991
FAM76A	23:2034388-2049551	6.85057	11.3906	0.733544	0.00045	0.00284262
SECISBP2L	10:9903129-9916714	16.5996	27.6006	0.733554	0.0002	0.0015308
SLC1A4	3:9807094-9830984	4.50423	7.49008	0.733698	0.00085	0.00450863
SPRY1	4:52775237-52982663	10.5573	17.5564	0.733757	0.00015	0.00122947
TMEM180	6:22692109-22704935	14.7544	24.536	0.733759	0.00015	0.00122947
GLRX	Z:57167985-57176365	11.7726	19.5775	0.733763	0.01165	0.0296066
STOML2	Z:8451026-8456885	33.3259	55.4268	0.733941	5e-05	0.000514991
SUGT1	1:165034516-165057072	17.3891	28.924	0.734082	5e-05	0.000514991
BBS4	10:1200432-1219254	4.28358	7.12557	0.734186	0.0018	0.00770675
MEF2D	25:577826-603090	5.10138	8.48702	0.734371	0.0005	0.00306562
ADAM33	4:89090235-89114319	4.60465	7.66098	0.734437	0.0009	0.00469705
MOCS1	3:28046780-28075053	44.9794	74.8479	0.734697	5e-05	0.000514991
CDKN1A	26:1543126-1545030	9.14536	15.2186	0.734721	0.00335	0.0121139
DAPP1	4:59708726-59730688	2.64577	4.40317	0.734852	0.00425	0.0143593
PPME1	1:194825626-194914017	9.33747	15.5407	0.734951	0.0005	0.00306562
PER3	21:291839-308592	6.8952	11.4763	0.734994	0.0001	0.000905426
FAM13B	13:13695528-13725044	5.94247	9.89087	0.735035	5e-05	0.000514991
SMOC1	5:26991939-27112082	3.51677	5.85358	0.735068	0.0006	0.00347619
STRIP1	26:1264324-1273712	7.34401	12.2254	0.735246	0.0001	0.000905426
CYP51A1	2:22620216-22633995	49.5976	82.5652	0.735263	5e-05	0.000514991
ALDH3A2	19:6847090-6853176	166.614	277.416	0.73554	0.0012	0.00575369
CHCHD10	15:7969261-7970528	556.787	927.078	0.735564	0.0006	0.00347619
PUF60	2:148725353-148755979	27.7798	46.2597	0.735716	0.00015	0.00122947
TMEM161B	Z:60417070-60449396	2.63891	4.39527	0.736012	0.01365	0.0332913
C4H8ORF40	4:33613025-33615356	12.7735	21.2765	0.736102	0.0005	0.00306562
ARHGEF17	1:194503472-194535205	1.48948	2.48112	0.736188	0.00905	0.0248073
RGN	1:129470050-129482680	136.615	227.593	0.73634	0.00035	0.0023562
FAM117A	27:3102831-3119721	3.8496	6.41328	0.736353	0.0088	0.0243276
C7	Z:12795474-12817485	34.0051	56.6579	0.736525	0.0066	0.0197966
ABAT	14:10055365-10084174	38.8637	64.7552	0.736575	0.01315	0.0324376
SDK1	14:3522006-3875659	1.31327	2.18864	0.736871	0.0016	0.00708415
MYH10	18:1676731-1825088	19.7272	32.8771	0.736898	0.00085	0.00450863
ENPEP	4:57434842-57469617	24.404	40.6717	0.736906	0.0004	0.00261006
CLSTN3	1:76885520-76900425	19.2216	32.0363	0.736976	5e-05	0.000514991
CCT6	19:4884980-4891209	61.9617	103.275	0.737049	0.00025	0.00183995
ITGA2	Z:15721123-15783248	0.822155	1.37042	0.737135	0.01875	0.0422698
SOS1	3:15955359-15992763	3.044	5.07472	0.737362	5e-05	0.000514991
CAMK1D	1:6257391-6474294	6.92501	11.5477	0.737717	0.0003	0.00210198
PTP4A3	2:145841489-145847749	56.5809	94.3514	0.737728	0.0001	0.000905426
KLHL20	8:5511292-5532545	9.83462	16.4044	0.738144	0.00015	0.00122947
PATL1	5:496792-500742	7.22083	12.0452	0.738225	0.00055	0.00326589
ENSGALG00000005464	4:2195655-2224025	12.4601	20.787	0.738365	5e-05	0.000514991
NT5C3A	2:48554439-48577945	4.32371	7.21394	0.738518	0.00225	0.00907145
SEC23B	3:14716776-14733389	21.0624	35.1441	0.738612	5e-05	0.000514991
TMEM184A	14:2611417-2615264	10.4583	17.4537	0.738885	0.0018	0.00770675
NAB1	7:39075-59273	14.3988	24.0311	0.738953	5e-05	0.000514991
ZBTB40	21:6162676-6189220	1.41966	2.36937	0.738958	0.00905	0.0248073
VPS45	25:89664-111313	8.66322	14.46	0.739094	5e-05	0.000514991
DNAJC11	21:536663-551506	24.5776	41.0283	0.739278	0.0001	0.000905426
BLK	3:106862803-106898321	1.73295	2.89295	0.739312	0.01245	0.0311583
FYCO1	2:43339785-43363519	12.2982	20.532	0.739428	5e-05	0.000514991
TJP3	28:991288-1002123	6.09773	10.1819	0.739661	0.00015	0.00122947
PLEKHB2	9:1740425-1751264	17.1707	28.674	0.739795	0.021	0.0461313
CX3CL1	11:766211-773374	2.76292	4.61434	0.739934	0.0008	0.00432192
HNF1B	19:8643565-8661541	3.28158	5.48146	0.740169	0.0029	0.0109265
COL24A1	8:14987157-15097242	1.68035	2.80705	0.740287	0.00135	0.00627457
GIPC2	8:17737491-17759541	26.0734	43.5565	0.740308	0.00015	0.00122947
GAL10	3:107053576-107056194	792.913	1324.72	0.740453	0.00155	0.00694705
SESN3	1:184678726-184693135	9.65529	16.1313	0.740473	0.00025	0.00183995
TLK2	27:2357454-2399073	6.64416	11.1012	0.740556	5e-05	0.000514991
TFAM	6:4694682-4699942	17.9684	30.0252	0.74071	0.00015	0.00122947
CCT8	1:103338187-103348898	61.714	103.13	0.740799	0.00015	0.00122947
ADAT2	3:51748191-51757550	12.1729	20.3422	0.740799	0.01365	0.0332913
UBXN4	7:30134925-30148126	38.6036	64.5274	0.741178	5e-05	0.000514991
POMGNT1	8:20399519-20411123	8.89798	14.8736	0.741207	0.0002	0.0015308
EEF1D	2:148453922-148468979	108.341	181.102	0.741225	0.0006	0.00347619
ACSM3	14:14913150-14927428	19.2523	32.1829	0.741261	0.00025	0.00183995
ATRIP	12:3279855-3290698	3.20471	5.35728	0.741304	0.00015	0.00122947
CDCA7	7:16830039-16838026	5.29613	8.85425	0.741431	0.0005	0.00306562
[4Fe-4S]	3:105336341-105420205	8.91234	14.9016	0.741593	0.00015	0.00122947
COPS7A	1:76630626-76633759	32.8646	54.9524	0.74165	0.00015	0.00122947
WSB2	15:11201186-11204679	35.7703	59.824	0.741963	5e-05	0.000514991
EDEM2	20:2895437-2907575	2.29887	3.84485	0.742005	0.00055	0.00326589
ENSGALG00000010335	8:20334388-20385736	2.72977	4.56556	0.742016	0.0028	0.0106562
HECTD4	15:6301497-6347392	8.37772	14.0118	0.742017	0.0003	0.00210198
SPTY2D1	5:11974194-11981099	8.08898	13.5304	0.742176	5e-05	0.000514991
GCHFR	5:1003402-1011083	84.4935	141.336	0.742222	5e-05	0.000514991
DDRGK1	4:88264091-88294378	9.99591	16.7218	0.742321	0.0001	0.000905426
FRYL	4:65919830-66048744	6.31325	10.5623	0.742471	5e-05	0.000514991
PREX2	2:115324552-115492355	5.32958	8.9167	0.742487	0.0001	0.000905426
C4	16:44244-58599	239.064	400.048	0.742777	0.0025	0.00983496
RIC8A	5:1632148-1643201	8.85515	14.8188	0.742841	5e-05	0.000514991
PBX1A	8:5190326-5294154	7.33796	12.2805	0.742917	0.0006	0.00347619
SLC25A14	4:1536609-1543497	5.5084	9.21919	0.743008	0.001	0.00507385
GALNT16	5:27313855-27374224	1.26918	2.12426	0.743067	0.00435	0.0145582
ENSGALG00000021437	13:9733462-9734974	33.6031	56.2433	0.743088	0.00015	0.00122947
MRPS11	10:12663654-12667185	47.7042	79.8461	0.743107	5e-05	0.000514991
ENSGALG00000028383	AADN03009974.1:20-1813	4.76009	7.96742	0.743123	0.0044	0.0146667
PRRC2B	17:6185874-6217198	11.1929	18.7351	0.743159	5e-05	0.000514991
ENSGALG00000004952	4:1998324-2006369	300.477	502.971	0.743222	0.0003	0.00210198
CDC23	13:17544376-17554780	4.22526	7.07304	0.74329	0.0008	0.00432192
MICU1	6:10918502-11009010	6.97856	11.6821	0.743295	0.0008	0.00432192
CHD7	2:112612963-112699976	4.92237	8.24007	0.743303	5e-05	0.000514991
THRSPB	1:192070044-192070743	1723.74	2885.57	0.743313	0.0104	0.0273278
Gga.52643	8:7496331-7500393	18.4183	30.837	0.743517	5e-05	0.000514991
FAM20B	8:6232351-6249306	5.05806	8.47125	0.743992	5e-05	0.000514991
ENSGALG00000002475,ENSGALG00000027637	10:426253-444155	17.8551	29.9046	0.744033	0.00155	0.00694705
MFSD7	Z:52533460-52549979	1.39693	2.33974	0.744084	0.00975	0.0261073
ZDHHC23	1:82459932-82466590	1.68168	2.8167	0.744104	0.00265	0.010249
PPP4R2	12:16511965-16539280	4.76949	7.98896	0.744172	0.0003	0.00210198
INCENP	5:16370273-16411563	2.57195	4.30854	0.744338	0.0017	0.00741449
LSM8	1:24119049-24124758	7.27055	12.1799	0.744363	0.0147	0.0351476
EDEM3	8:7903723-7931488	12.932	21.6653	0.744435	0.0002	0.0015308
RBL1	20:626684-647924	2.84395	4.76525	0.744656	0.0004	0.00261006
NSUN2	2:79747253-79763606	5.35379	8.9724	0.744934	0.00025	0.00183995
TCIRG1	5:202207-207881	19.3463	32.4247	0.745038	0.0001	0.000905426
LPCAT3	1:76836839-76852468	63.0891	105.768	0.745446	0.0001	0.000905426
CDAN1	5:25131813-25159859	5.13809	8.61429	0.745501	5e-05	0.000514991
TAF15	19:4346497-4364703	11.1041	18.6172	0.745543	5e-05	0.000514991
DNA2	6:10199220-10214213	0.907336	1.52127	0.745565	0.01535	0.036411
ENSGALG00000009709	28:3057051-3063738	3.03118	5.08301	0.745804	0.0016	0.00708415
ENSGALG00000007574	4:11428767-11442089	15.0131	25.1793	0.746015	0.00015	0.00122947
SQSTM1	13:12782158-12786548	80.9358	135.763	0.746237	0.0001	0.000905426
ACAP3	21:2410358-2443945	1.71957	2.88464	0.746344	0.00655	0.0197074
AMBRA1	5:22815788-22936526	9.57618	16.0677	0.746641	0.0001	0.000905426
OSTF1	Z:36702412-36722019	19.3724	32.5046	0.746643	0.0001	0.000905426
YEATS2	9:2118566-2160894	4.66091	7.82075	0.746696	5e-05	0.000514991
MGA	5:24268924-24313980	7.89542	13.2482	0.74671	0.0001	0.000905426
PICK1	1:50874809-50886657	3.19736	5.36588	0.746934	0.00075	0.00411848
ENSGALG00000007840	15:10804519-10813425	59.8018	100.375	0.747145	5e-05	0.000514991
SKAP2	2:32527253-32718046	11.2741	18.9238	0.747184	5e-05	0.000514991
CCDC34	5:3627317-3645623	5.54629	9.30954	0.747188	0.00425	0.0143593
TMEM259	28:2813053-2822485	19.591	32.8858	0.747274	5e-05	0.000514991
RORalpha1	10:4513259-4533758	3.16037	5.3061	0.747556	0.0062	0.0189175
ENSGALG00000016141	2:148412676-148428775	13.5236	22.7075	0.747687	5e-05	0.000514991
CHD2	10:14112773-14149142	10.1129	16.9817	0.747782	0.00015	0.00122947
ENSGALG00000006463	12:11249995-11253626	164.307	275.94	0.74796	5e-05	0.000514991
NUDT14	5:52117314-52170635	4.20621	7.06507	0.748183	0.00025	0.00183995
ENSGALG00000007954	15:10844350-10849824	16.6933	28.0408	0.748257	0.00035	0.0023562
TMEM184B	1:50807044-50830299	19.3979	32.5851	0.748312	0.0001	0.000905426
RASD1	14:4778982-4780829	119.922	201.503	0.7487	0.0005	0.00306562
RALA	2:50456463-50464743	4.19155	7.04314	0.748736	0.02225	0.048117
SMARCA5	4:30063267-30084414	7.14988	12.0149	0.74883	5e-05	0.000514991
GLDC	Z:27889480-27927357	98.2218	165.064	0.74891	0.0025	0.00983496
COL16A1	23:4921630-4939423	4.61866	7.76189	0.748932	0.00035	0.0023562
IL2RG	4:2367918-2370689	21.0086	35.3092	0.749062	0.0001	0.000905426
TOE1	8:19937224-19941906	2.77613	4.66584	0.749062	0.0126	0.031426
CTNND1	5:16245179-16269584	40.1554	67.4972	0.749235	0.00015	0.00122947
ZFYVE9	8:23208934-23244935	3.82115	6.42312	0.749269	5e-05	0.000514991
OSBPL2	20:8140756-8168238	9.71487	16.3325	0.749476	0.0004	0.00261006
TRRAP	14:1318112-1391627	7.34373	12.3464	0.749506	0.00015	0.00122947
C1orf198	3:39856095-39877680	2.87605	4.83625	0.7498	0.00115	0.00558968
WBP2NL	1:49293375-49297070	6.72018	11.3012	0.7499	0.00875	0.0242238
TRAF1	17:8298124-8307502	4.66832	7.85081	0.749939	0.00265	0.010249
METTL21A	7:11679315-11681725	24.8888	41.8592	0.750049	0.0006	0.00347619
SLK	6:23623563-23666255	6.1012	10.2617	0.750105	5e-05	0.000514991
AP3D1	28:2034947-2061947	10.3281	17.3722	0.750202	5e-05	0.000514991
OTUD1	2:17237192-17240043	10.1849	17.1314	0.750204	0.00025	0.00183995
STXBP4	18:5811035-5864100	1.18211	1.98839	0.750228	0.0177	0.0405683
ENSGALG00000001800	28:1548032-1554708	2.7675	4.65531	0.750293	0.0078	0.0224063
SFT2D2	1:83510259-83517336	35.1029	59.0556	0.750484	0.0001	0.000905426
chSAP18	1:177864254-177866586	157.958	265.807	0.750838	0.0001	0.000905426
CDT1	11:17932050-17935844	9.07846	15.2777	0.750908	0.0008	0.00432192
RCOR1	5:49651288-49665372	5.11054	8.60058	0.750958	0.00085	0.00450863
ABHD2	10:12480720-12504608	39.1182	65.8339	0.750993	5e-05	0.000514991
GSE1,KIAA0513	11:17104457-17233182	6.86477	11.5535	0.751044	0.00125	0.00591812
STARD4	Z:46333365-46341826	28.1443	47.3683	0.751079	0.0008	0.00432192
DMB2	16:76299-79327	25.8756	43.5526	0.751166	0.0004	0.00261006
C10orf54	6:11375532-11501581	6.83816	11.5108	0.751304	0.0001	0.000905426
GOLGA1	17:9563718-9577946	4.53351	7.63153	0.751345	0.00035	0.0023562
SLC51A	9:14396154-14398347	234.207	394.266	0.751381	0.00035	0.0023562
PUS7	1:13788330-13809208	4.07703	6.86498	0.751737	0.00015	0.00122947
PCDH12	13:1751167-1760560	3.63925	6.12808	0.751795	0.00135	0.00627457
ATP6V1G1	17:2500734-2503643	60.1791	101.342	0.751898	5e-05	0.000514991
PBX3	17:9728780-9823708	2.90136	4.88598	0.751916	0.00555	0.0174305
USP47	5:7604897-7657569	9.11161	15.3443	0.751922	5e-05	0.000514991
GRB2	18:11015583-11049321	44.8231	75.4924	0.752089	5e-05	0.000514991
TTC31	AADN03014618.1:20-4165	20.6439	34.7735	0.752274	5e-05	0.000514991
NUP98	1:193867727-193906136	10.2605	17.2846	0.75239	0.0001	0.000905426
SUCNR1	9:22904486-22905440	5.13889	8.65704	0.752417	0.02085	0.045914
LMBRD2	Z:10796193-10849384	5.31217	8.94896	0.752419	0.00695	0.0205717
SART3	15:6500744-6514750	6.63788	11.1825	0.752443	5e-05	0.000514991
POLH	3:30230595-30238978	8.5585	14.4189	0.752534	0.00035	0.0023562
ENSGALG00000029127	13:1131592-1134055	2.52329	4.25134	0.752613	0.0233	0.0498432
ENSGALG00000003477	JH375561.1:16560-20659	26.9825	45.4659	0.752763	0.0001	0.000905426
RNF144B	2:60324505-60357712	7.164	12.072	0.752825	0.00435	0.0145582
DNAJC21	Z:10426981-10441296	4.26274	7.1834	0.752886	0.0005	0.00306562
BCAT1	1:65511651-65570645	14.3891	24.2486	0.75293	0.0002	0.0015308
UNC119B	15:9185889-9192156	9.6169	16.2067	0.75295	5e-05	0.000514991
P4HA1	6:10763562-10791996	9.5263	16.0558	0.753105	5e-05	0.000514991
TMEM243	1:7358545-7361773	6.02548	10.1558	0.753152	0.02115	0.0463475
WDR41	Z:23042881-23063494	3.02782	5.10363	0.753243	0.01085	0.0281368
ENSGALG00000021451	11:1039249-1041839	54.3423	91.602	0.753303	0.0002	0.0015308
STX18	4:78178488-78233602	11.4748	19.3426	0.753304	0.0001	0.000905426
THUMPD3	12:19408500-19414245	12.7081	21.4226	0.753391	5e-05	0.000514991
ODF2	17:5110455-5128457	4.47701	7.54803	0.753564	0.0001	0.000905426
FKBP4	1:75178045-75192167	34.3393	57.8999	0.753699	0.0001	0.000905426
ENSGALG00000025953	22:85973-90992	9.22387	15.553	0.753746	5e-05	0.000514991
Stat5	27:4875163-4886606	66.9242	112.846	0.753755	0.0002	0.0015308
SMYD2	3:20511714-20538253	4.36963	7.36813	0.753786	0.00365	0.0128603
RAPGEF3	LGE22C19W28_E50C23:430844-441023	4.85483	8.18662	0.753846	0.00155	0.00694705
ENSGALG00000001591	18:3440129-3444982	3.35165	5.65223	0.753946	0.01145	0.0292319
CACTIN	28:1036060-1041471	14.5657	24.5637	0.753957	0.00015	0.00122947
RBP5	1:76883868-76885500	105.886	178.584	0.7541	5e-05	0.000514991
ENSGALG00000016572	3:104737931-104748006	23.6519	39.8939	0.75421	0.0001	0.000905426
PAK1	1:192266739-192313761	0.414382	0.698994	0.754319	0.01935	0.0432883
TAPP2	22:2404253-2413653	5.39312	9.09737	0.754329	0.0051	0.01632
CPSF3L	21:2341813-2354367	15.0246	25.3461	0.75444	0.0004	0.00261006
NT5DC1	3:63337143-63456951	3.67047	6.19211	0.754467	0.00735	0.0214031
EXOC4	1:1361641-1822074	8.85834	14.9446	0.754517	5e-05	0.000514991
CHN1	7:16219610-16299658	3.53573	5.96522	0.754566	0.00215	0.00878042
FKBP15	17:1501594-1527639	11.7289	19.7886	0.754602	0.0001	0.000905426
DCAF10	Z:81411704-81424704	7.63773	12.8868	0.754685	0.0003	0.00210198
NFYC	23:4876435-4892120	41.0432	69.2616	0.754913	5e-05	0.000514991
TKT	12:6937216-6960127	37.3767	63.0747	0.754923	0.0001	0.000905426
B3GLCT	1:174203172-174247847	2.34194	3.95226	0.754976	0.0011	0.00543256
LTA4H	1:45566260-45580903	37.3448	63.0249	0.755015	5e-05	0.000514991
PDLIM7	13:9489573-9506020	2.88247	4.86482	0.755082	0.0087	0.0241426
MIB1	2:102139213-102207469	14.5748	24.6009	0.755231	5e-05	0.000514991
ORAI2	19:4139106-4148388	4.19835	7.08758	0.755469	0.00055	0.00326589
CPD	19:6248637-6271075	49.5727	83.6918	0.755541	0.0006	0.00347619
WDTC1	23:1885356-1906513	31.0257	52.3853	0.755701	5e-05	0.000514991
ZBTB11	1:84729830-84741575	5.54542	9.3635	0.755751	5e-05	0.000514991
SOAT1	8:6145934-6172666	22.5554	38.0891	0.755902	0.0001	0.000905426
CP	9:23359471-23377519	99.6972	168.365	0.75597	0.0035	0.0124786
NR2C1	1:45195369-45239814	5.54978	9.37419	0.756263	0.0001	0.000905426
SCG2	9:7713654-7715544	1.04991	1.77352	0.756348	0.02035	0.0450423
ENSGALG00000012410	1:50994991-50999234	7.00607	11.8348	0.756356	0.00075	0.00411848
VAV2	17:7049743-7148021	33.0357	55.8226	0.756822	5e-05	0.000514991
DUT	10:9639941-9649503	3.72984	6.30285	0.75689	0.0004	0.00261006
C8G	17:513114-529425	233.147	394.111	0.757362	0.00085	0.00450863
ACTB	14:4169149-4172343	659.862	1115.51	0.757473	0.00795	0.0227254
MGAT3	1:50490803-50492294	8.86192	14.9822	0.757563	0.00165	0.00724511
DIP2B	LGE22C19W28_E50C23:154786-213469	18.5416	31.3515	0.757773	5e-05	0.000514991
EIF2B5	9:15246614-15264143	8.84673	14.9597	0.757868	5e-05	0.000514991
RAD51	5:950878-957935	4.58673	7.75682	0.757999	0.00475	0.0155102
ENSGALG00000016196	1:109034822-109059060	40.0167	67.6858	0.75825	5e-05	0.000514991
DCBLD1	3:62847767-62894456	3.77737	6.39231	0.758955	0.0007	0.00392322
SLC4A2	2:275326-288944	10.29	17.4138	0.758984	0.00415	0.0141194
ADCY7	11:6010766-6037599	2.201	3.72557	0.759299	0.00115	0.00558968
ISCA2	5:37203489-37204559	42.8783	72.5911	0.759545	0.00045	0.00284262
ENSGALG00000027686	AADN03010952.1:1160-8712	8.4647	14.331	0.75961	0.0137	0.0333784
MKI67	6:32890713-32910556	3.2139	5.44259	0.75997	5e-05	0.000514991
FBXO45	9:4197393-4202195	25.7785	43.6585	0.760094	0.0001	0.000905426
EPCAM	3:8534386-8539545	17.2722	29.2524	0.760103	5e-05	0.000514991
PGPEP1	28:3721466-3726317	14.4957	24.5513	0.760171	0.00075	0.00411848
GAB3	4:14214092-14257191	1.64642	2.78856	0.760184	0.0025	0.00983496
CRY1	1:53554187-53588375	17.6182	29.8431	0.760331	0.0001	0.000905426
SUPT5H	JH375654.1:5781-13387	11.1121	18.8247	0.760504	5e-05	0.000514991
SUPT6H	19:5772758-5792698	19.0642	32.2976	0.760559	0.0001	0.000905426
NHE1	23:1858072-1868819	1.74595	2.95793	0.760573	0.0013	0.00609065
TERF2	11:18383994-18391771	6.2358	10.5658	0.760752	0.00015	0.00122947
ATP1A1	1:79683347-79701497	91.9481	155.805	0.760853	0.0007	0.00392322
SNX17	3:104109216-104118369	19.3651	32.8184	0.761048	5e-05	0.000514991
PPIG	7:18115844-18140425	4.07701	6.91024	0.761223	5e-05	0.000514991
COX4I1	11:17077533-17081626	275.718	467.455	0.761633	0.00015	0.00122947
QRICH1	12:11587735-11608560	8.1308	13.7855	0.761678	0.0002	0.0015308
KIAA1919	3:65614621-65620951	7.19136	12.1939	0.761827	0.00065	0.0036944
PLD1	9:18987371-19027508	11.2039	18.9994	0.761949	0.0002	0.0015308
AMFR	11:2154520-2175204	48.2244	81.7849	0.762071	0.00015	0.00122947
TNIK	9:19060652-19170911	2.28095	3.86891	0.762296	0.00105	0.00524103
PAOX	6:8918494-8927456	31.0415	52.6559	0.762399	5e-05	0.000514991
PARP3	12:3142119-3145054	6.04727	10.2592	0.762556	0.0023	0.00921262
ZNF341	20:2450061-2469159	1.79809	3.0521	0.763334	0.0046	0.0151731
ENSGALG00000006246	9:15353098-15355625	13.4537	22.8387	0.763478	0.00015	0.00122947
OSBPL6	7:14935827-14977668	2.05579	3.48997	0.763521	0.0018	0.00770675
ENSGALG00000005870	1:6582222-6603252	0.647893	1.09993	0.76359	0.0097	0.0260092
ASCC1	6:11038445-11065354	6.933	11.7708	0.763665	0.00135	0.00627457
B4GALT5	20:14207184-14231836	7.93964	13.4857	0.76429	0.0008	0.00432192
PLEKHA8	2:34431677-34454260	2.49255	4.23382	0.764338	0.00055	0.00326589
SIPA1L1	5:26239331-26350159	2.8614	4.86369	0.765332	0.0001	0.000905426
PFKFB2	26:2560503-2567901	5.81995	9.89299	0.7654	0.0011	0.00543256
BDH1	9:12115162-12127577	4.5783	7.78261	0.765442	0.00055	0.00326589
LIMA1	LGE22C19W28_E50C23:245372-265576	15.9377	27.0941	0.765538	5e-05	0.000514991
TFCP2L1	7:25539596-25568408	3.02902	5.14939	0.765548	0.0065	0.0195973
VPS18	5:23582539-23591392	6.92652	11.7759	0.765629	5e-05	0.000514991
PIK3CB	9:5092107-5175814	2.60698	4.43243	0.765721	0.0003	0.00210198
UHRF1	28:4594417-4604249	4.52709	7.69712	0.765735	0.0003	0.00210198
CHCHD2	19:4902070-4904224	753.286	1280.85	0.765837	0.001	0.00507385
ADCK3	3:11801156-11822257	24.7266	42.0477	0.765964	5e-05	0.000514991
CCDC171	Z:31837384-31979848	0.917276	1.55991	0.766037	0.003	0.0111877
MOCOS	2:84812788-85025689	10.1911	17.3343	0.766317	5e-05	0.000514991
ENSGALG00000002578	Z:9080464-9084896	9.4093	16.0065	0.766497	0.0016	0.00708415
RNF26	24:4198470-4199880	15.4341	26.265	0.767017	0.00055	0.00326589
SPI1	5:22247549-22268506	27.9666	47.5929	0.767041	5e-05	0.000514991
ADPRHL2	23:4092972-4097739	11.0684	18.8371	0.767134	5e-05	0.000514991
MAST2	8:20161457-20324965	5.57176	9.48279	0.767179	5e-05	0.000514991
PYGB	3:4121557-4135789	4.16692	7.09209	0.76723	0.00025	0.00183995
SRSF3	26:1527548-1533439	25.81	43.9307	0.7673	5e-05	0.000514991
VAMP3	21:308982-312748	18.2553	31.0759	0.767481	0.00065	0.0036944
MECR	23:2703200-2708797	15.7041	26.7332	0.767491	0.00055	0.00326589
ENSGALG00000001938	8:1182029-1195519	3.42558	5.83155	0.767532	0.0001	0.000905426
CNP	27:4733937-4738865	23.2803	39.6346	0.767652	5e-05	0.000514991
HSPD1	7:9720879-9729711	151.161	257.352	0.767658	0.00055	0.00326589
PPP1R12B	26:669755-753658	2.97025	5.05776	0.767916	0.00055	0.00326589
KIF15	2:43768480-43804535	1.54607	2.63297	0.76809	0.0003	0.00210198
TIMP3	1:52867137-53186826	29.484	50.2192	0.768305	0.0009	0.00469705
PRADC1	4:89225646-89228178	16.6104	28.2964	0.768534	0.0003	0.00210198
TRIM28	JH376246.1:13074-20844	5.12909	8.73764	0.768542	0.00205	0.00849982
DDX28	11:2885818-2903624	15.2409	25.9649	0.76862	0.00435	0.0145582
POR	19:4304086-4327912	145.633	248.115	0.768665	0.00095	0.00489457
CLCN7	14:12286741-12303716	6.42966	10.9551	0.768782	5e-05	0.000514991
MED20	26:5056219-5060765	20.6812	35.2376	0.768799	0.00015	0.00122947
ERLIN1	6:8850166-8866356	8.47194	14.4379	0.769093	5e-05	0.000514991
ABHD17A	28:2167136-2173953	8.45266	14.4057	0.76916	0.00105	0.00524103
RGS19	20:9692143-9695672	7.14243	12.175	0.769437	0.0146	0.0349371
ENSGALG00000016471	3:100224718-100231095	3.71469	6.33281	0.769602	0.0016	0.00708415
HNRNPH1	13:12896977-12911863	108.069	184.253	0.769732	0.0001	0.000905426
NCAM1	24:5803420-5884198	2.25742	3.84891	0.769771	0.00275	0.0105311
CRB2	17:8989403-9014494	0.795549	1.35645	0.769809	0.0142	0.0342042
PEX26	1:62185615-62189063	7.77847	13.2631	0.769858	0.0058	0.0180266
FYB	Z:12129417-12192609	3.79706	6.47461	0.769909	5e-05	0.000514991
LPCAT2	11:3134044-3162192	1.64301	2.8019	0.770065	0.0032	0.0117129
SEC22C	2:1886498-1900914	5.12271	8.73733	0.770285	5e-05	0.000514991
DOT1L	28:1978405-2033934	4.78982	8.17029	0.770414	5e-05	0.000514991
SEC14L5	14:13330124-13358238	2.45414	4.18675	0.770612	0.0019	0.00801155
ALCAM	1:85893283-86010821	1.88556	3.21723	0.770826	0.0002	0.0015308
TTYH3	14:3242658-3274038	25.7928	44.0114	0.770907	5e-05	0.000514991
KIAA1755	20:10700367-10707694	1.4086	2.40368	0.770981	0.02145	0.0468204
RASGEF1B	4:45006256-45022555	0.726412	1.23959	0.770999	0.0224	0.0483787
LYSMD2	10:8581241-8590880	13.1594	22.4569	0.771062	0.0014	0.0064302
DBNL	JH376331.1:95242-105249	20.6858	35.3029	0.771146	0.00055	0.00326589
C1QA	21:6064484-6066427	124.616	212.681	0.7712	5e-05	0.000514991
ENSGALG00000000641	11:18376039-18378680	17.9082	30.564	0.771209	0.0001	0.000905426
RPL19	27:4119553-4121900	781.545	1334	0.771361	0.0006	0.00347619
ABTB1	12:9657434-9685045	7.85746	13.4122	0.771412	5e-05	0.000514991
SIK2	24:62298-94625	27.4256	46.8162	0.771484	5e-05	0.000514991
DIAPH1	4:5889626-5934997	18.2007	31.0703	0.771544	0.002	0.00835181
LYPLA2	23:5540375-5544210	17.2963	29.5271	0.771574	5e-05	0.000514991
BSDC1	23:5145915-5152332	16.4654	28.1099	0.771639	5e-05	0.000514991
NAV3	1:38593309-38850635	1.14854	1.96086	0.771687	0.00065	0.0036944
DHRS13	19:5879954-5882087	12.9831	22.1672	0.771793	0.0037	0.0130012
CTGF	3:56638963-56641934	13.8128	23.5842	0.771812	5e-05	0.000514991
HELZ2	20:14260722-14277263	20.486	34.9783	0.771818	0.0005	0.00306562
FKTN	Z:54866068-54882250	5.74622	9.81123	0.771822	0.00065	0.0036944
ENSGALG00000013067	1:62247441-62256472	13.555	23.1515	0.772281	5e-05	0.000514991
NKAP	4:16444251-16448451	4.70258	8.03401	0.772669	0.001	0.00507385
PEAK1	10:2559229-2587729	5.44302	9.29949	0.772745	5e-05	0.000514991
RARA	AADN03013339.1:20-2177	8.91686	15.2355	0.77283	0.0029	0.0109265
NUDT9	4:45114313-45120701	11.1654	19.0792	0.772963	0.00015	0.00122947
ZNF652	27:3392384-3400111	10.3795	17.7366	0.772994	5e-05	0.000514991
XRCC3	5:50375578-50384291	8.19877	14.0111	0.773093	0.00025	0.00183995
CD82	5:21271277-21305215	25.2805	43.206	0.773207	5e-05	0.000514991
RPS6	Z:33595464-33600075	923.83	1578.99	0.773303	0.0036	0.0127457
CUTC	6:21640893-21644567	15.9673	27.292	0.773356	0.0002	0.0015308
RILP	19:5337344-5341403	20.6711	35.3368	0.773554	5e-05	0.000514991
APBA1	Z:34557666-34594736	0.724976	1.23938	0.773612	0.0039	0.0134929
TXNDC11	14:886749-907538	6.37782	10.905	0.773851	5e-05	0.000514991
GPN2	23:1795709-1800206	12.0326	20.5745	0.773913	0.0003	0.00210198
YDJC	15:353465-366947	9.05188	15.4778	0.773915	0.0019	0.00801155
ENSGALG00000026289	AADN03026458.1:20-988	30.8932	52.8278	0.774007	0.00025	0.00183995
INTS1	14:2555734-2582748	11.9978	20.5169	0.774044	5e-05	0.000514991
ENSGALG00000023447	11:18371566-18374690	34.1795	58.4505	0.774083	5e-05	0.000514991
POLR1E	Z:81439470-81452029	9.47325	16.2021	0.774248	0.00035	0.0023562
AGAP3	2:185821-245090	20.0182	34.2373	0.774257	5e-05	0.000514991
USP48	21:6557286-6581333	9.37666	16.0375	0.774302	5e-05	0.000514991
GMPR	2:61611281-61643300	12.9184	22.0955	0.774326	0.0003	0.00210198
PSMA5	JH375456.1:1241-9450	25.2174	43.1379	0.774533	5e-05	0.000514991
CMSS1	1:83998000-84011973	2.68494	4.59296	0.774534	0.01625	0.0380895
ARFIP2	1:193571513-193576135	6.16283	10.5425	0.774558	0.00205	0.00849982
LIPG	Z:1060882-1069738	1.06646	1.82438	0.774578	0.0184	0.0416658
MAF1	JH375719.1:3375-8475	29.7139	50.8323	0.774607	5e-05	0.000514991
DDX49	28:3489320-3495011	7.37606	12.6187	0.774639	0.0002	0.0015308
JAG1	3:12843172-12878172	3.70809	6.34368	0.774643	0.0002	0.0015308
CHMP7	22:1256815-1265197	19.1181	32.7079	0.774701	5e-05	0.000514991
PAG1	2:120988401-121062954	5.20369	8.90405	0.774927	0.0014	0.0064302
DIXDC1	24:6190722-6217912	1.07019	1.83129	0.774991	0.01985	0.0441952
NCL	9:14750403-14758732	35.9202	61.4695	0.775077	5e-05	0.000514991
SRSF7	3:15885994-15893078	30.9649	53.0011	0.77539	5e-05	0.000514991
CRISPLD2	11:16374570-16399831	1.68356	2.88174	0.775422	0.01385	0.0336246
HNRNPH3	6:10166620-10171427	61.5383	105.342	0.775528	5e-05	0.000514991
IPP	8:20127585-20134074	3.07969	5.27193	0.775547	0.0038	0.0132648
STIM2	4:72683439-72741445	7.00316	11.9898	0.775732	5e-05	0.000514991
SMG7	8:7564280-7592106	4.43533	7.59392	0.775802	5e-05	0.000514991
EIF4G1	9:15371231-15387501	32.53	55.7006	0.775922	5e-05	0.000514991
CNNM1	6:21690898-21703073	2.2273	3.81393	0.77598	0.0122	0.0307236
DAPK3	28:1447841-1453358	4.45721	7.63247	0.776008	0.0004	0.00261006
KANK4	8:26365576-26378312	13.8534	23.7265	0.776263	5e-05	0.000514991
PRPSAP1	18:4413064-4436276	6.44094	11.0334	0.776528	0.0002	0.0015308
LARS	13:17255690-17279340	15.2475	26.1209	0.776635	5e-05	0.000514991
AURKAIP1	21:2236358-2238940	22.5973	38.7162	0.776786	0.0001	0.000905426
KXD1	28:3657471-3659967	5.42454	9.29415	0.776822	0.0008	0.00432192
ENTPD1	6:21551706-21577502	4.57121	7.83211	0.776825	0.001	0.00507385
B4GALT4	1:80036446-80061032	9.14167	15.6686	0.777349	5e-05	0.000514991
TMEM57	23:2325806-2336889	6.22313	10.6672	0.777467	5e-05	0.000514991
ABCF3	9:15316944-15324334	28.8531	49.4613	0.777576	5e-05	0.000514991
DLGAP5	5:56134599-56152967	1.91332	3.28015	0.777681	0.0027	0.0103805
SCNN1A	1:76382782-76390957	0.744042	1.27565	0.77778	0.02305	0.0493898
SPR	4:89390873-89393991	138.838	238.037	0.777785	0.00015	0.00122947
ENSGALG00000026076	AADN03023188.1:7880-14077	1.97556	3.38779	0.778082	0.02115	0.0463475
CCDC28B	23:5116498-5118324	6.22348	10.6724	0.778097	0.01965	0.0438502
MED12	4:2332975-2367177	7.78671	13.3553	0.778327	5e-05	0.000514991
TMCC3	1:45037003-45076411	1.59092	2.72868	0.778344	0.0167	0.0388558
SRPK1	26:95395-113328	17.5278	30.0632	0.778349	5e-05	0.000514991
DHX36	9:22652323-22670920	12.116	20.7856	0.778674	5e-05	0.000514991
MFI2	9:11940275-11956868	23.152	39.7199	0.778725	0.0001	0.000905426
MRTO4	21:4666776-4668928	31.2598	53.6326	0.778801	5e-05	0.000514991
PLXND1	12:19511693-19575586	21.2045	36.384	0.778936	5e-05	0.000514991
DUSP5	6:25517713-25527369	1.9976	3.42775	0.778993	0.00805	0.0229327
STARD3NL	2:46622124-46642380	7.0045	12.0197	0.779042	0.00035	0.0023562
PASK	9:4409465-4428357	0.932174	1.59988	0.779289	0.0047	0.01539
SDF2	19:5765761-5767653	14.5396	24.956	0.779401	0.0002	0.0015308
EFR3B	3:105019504-105046269	2.77932	4.77233	0.779961	0.00155	0.00694705
ZNFX1	20:7062872-7075426	68.3192	117.315	0.780027	0.0022	0.00893153
EEF2K	14:8636415-8660489	10.0166	17.2006	0.780061	5e-05	0.000514991
FAM136A	22:2995890-2998638	69.6409	119.606	0.78028	0.00035	0.0023562
SFMBT1	12:842292-874242	1.50452	2.58417	0.780402	0.00715	0.0210093
PLCG2	11:15140810-15193158	3.73101	6.4085	0.780419	5e-05	0.000514991
LARP4B	2:10249041-10281209	14.4582	24.8344	0.780458	5e-05	0.000514991
KCNT2	8:2684297-2791265	5.30911	9.11953	0.780491	5e-05	0.000514991
TALDO1	5:21738-26781	30.4001	52.2217	0.780574	5e-05	0.000514991
ENSGALG00000014643	25:1432499-1466520	4.82791	8.29524	0.780884	5e-05	0.000514991
ENSGALG00000021636	19:4100969-4106611	20.5594	35.3279	0.781008	5e-05	0.000514991
ENSGALG00000004252	28:4692986-4696452	3.91631	6.7298	0.781067	0.0131	0.0323211
SPTLC2	5:38541885-38599635	12.848	22.0787	0.781114	5e-05	0.000514991
ERAL1	19:5858143-5862165	9.74538	16.7477	0.781172	0.00015	0.00122947
BCL2L15	26:3701944-3704681	36.1797	62.1831	0.781344	0.0001	0.000905426
ZNF335	20:10900408-10909059	9.28234	15.9552	0.781466	5e-05	0.000514991
FAM83H	2:148565718-148571435	3.08738	5.30743	0.781629	0.00015	0.00122947
MVD	11:17895873-17898830	81.0519	139.343	0.781728	5e-05	0.000514991
SNRNP40	23:565516-576268	11.6516	20.0334	0.781879	0.0001	0.000905426
IL15	4:29463072-29495702	11.3205	19.4642	0.781886	0.0001	0.000905426
PGM2	4:69409003-69426500	49.2925	84.7533	0.781901	0.0001	0.000905426
TEX264	12:2879887-2903051	22.0711	37.9547	0.782121	5e-05	0.000514991
ENSGALG00000028992	4:37159320-37162614	200.053	344.071	0.782324	0.0001	0.000905426
ENSGALG00000027696	28:3825625-3828822	6.31759	10.8663	0.782413	0.00015	0.00122947
LACTB	10:3651162-3658011	10.8025	18.5807	0.782445	5e-05	0.000514991
LLGL1	14:5050462-5059487	6.72137	11.5631	0.782706	5e-05	0.000514991
GNA11	Z:37646972-37760713	5.98989	10.3048	0.782714	0.00085	0.00450863
RRAGC	23:3217149-3225967	3.9188	6.74194	0.782752	0.00015	0.00122947
ENSGALG00000020700	8:20024057-20026561	2.92086	5.02532	0.782823	0.0144	0.0346003
IPO9	26:561800-580942	7.69255	13.2378	0.783129	5e-05	0.000514991
NDUFC2	1:192061272-192064192	42.0835	72.4221	0.783176	5e-05	0.000514991
CACHD1	8:26977491-27061474	1.41048	2.42757	0.783332	0.00235	0.00938393
ABCF2	2:127172-139454	8.95639	15.4161	0.783449	5e-05	0.000514991
SH3BP5	2:42031975-42073412	23.4261	40.3223	0.783457	5e-05	0.000514991
ENSGALG00000009628	4:11342240-11344315	12.1254	20.8716	0.783509	0.00215	0.00878042
ARHGEF9	4:11728002-11826335	3.78235	6.51179	0.783774	0.0021	0.0086549
LMAN2L	AADN03010880.1:20-10179	15.853	27.2967	0.783972	0.0007	0.00392322
WWC1	13:4122990-4186409	5.96487	10.2744	0.784496	5e-05	0.000514991
TAF13	1:82802708-82805017	37.7793	65.0786	0.784589	5e-05	0.000514991
ELF3	26:309758-314195	19.5378	33.6578	0.784671	0.0001	0.000905426
RAI1	14:4892180-4899602	1.89165	3.25912	0.784841	0.00125	0.00591812
RRP12	6:21896932-21905884	5.84681	10.0744	0.784973	5e-05	0.000514991
SELM	15:9991441-10000294	22.6601	39.045	0.784983	0.00455	0.0150635
BIN2	JH375734.1:2112-6133	3.51686	6.06059	0.78517	0.00705	0.0207992
HIRA	15:625942-648784	9.04833	15.5931	0.785181	5e-05	0.000514991
[truncated: 1,917 more rows]
