# Supplementary material for: Supplementing Genistein for Breeder Hens Alters the Fatty Acid Metabolism and Growth Performance of Offsprings by Epigenetic Modification
Source: Oxid Med Cell Longev. 2019 Mar 26;2019:9214209. doi: 10.1155/2019/9214209 (PMC6458848; doi:10.1155/2019/9214209)
Supplement: Supplementary 9 — Table 7: the functional cluster analysis of histone modifications using DEGs. [file 9214209.f9.xls]

## Sheet: Sheet1
Supplementary Table 7. The functional cluster analysis of histone modifications using DEGs
GO_Name	GO_ID	Gene|fold change	Count	Pop_Hit	P_Value
Methylation	GO:0032259	MPHOSPH8|1.51; SNW1|1.51; SATB1|1.52; ASH1L|1.525; SETD7|1.52; MRM1|1.52; NSUN4|1.54; FBXO11|1.55; LOC423008|1.54; WBSCR22|1.55; SETD3|1.56; LCMT1|1.56; SETD1B|1.56; DPH5|1.57; TRMT10A|1.57; DNMT1|1.60; NSUN5|1.60; TRMT61A|1.60; NSD1|1.61; ASH2L|1.62;ATRX|1.62; METTL16|1.63; NSUN2|1.68; METTL21A|1.68; THUMPD3|1.69; SMYD2|1.70; SUPT6H|1.70; SPI1|1.70; DOT1L|1.71; LOC100858909|1.71; ZNF335|1.72; SE…	50	383	0.257
Histone lysine methylation	GO:0034968	SNW1|1.51; ASH1L|1.52; SETD7|1.52; SETD3|1.55; SETD1B|1.56; NSD1|1.61; ASH2L|1.620; ATRX|1.62; SMYD2|1.69; SUPT6H|1.69; DOT1L|1.71; ZNF335|1.72; SETDB1|1.75; BRCA1|1.78; RBBP5|1.83; YD3|1.94; CHD5|1.95; IWS1|1.98; RIF1|1.99; PRDM5|3.29	20	111	0.0693
Histone H3-K36 methylation	GO:0010452	ASH1L|1.52; SETD3|1.55; NSD1|1.61; SMYD2|1.691; IWS1|1.98	5	16	0.044
Histone H3-K36 trimethylation	GO:0097198	SETD2|1.52;IWS1|1.98	1	2	0.0424
Histone H3-K36 dimethylation	GO:0097676	ASH1L|1.52	1	1	0.0893
Histone H3-K4 demethylation	GO:0034720	KDM1A|1.60; KDM5A|1.83	2	8	0.072
Histone H3-K4 methylation	GO:0051568	SNW1|1.51; ASH1L|1.52; SETD3|1.55; ASH2L|1.62; ZNF335|1.72;	7	43	0.0307
		BRCA1|1.78; RBBP5|1.83
Histone H3-K4 demethylation, trimethyl-H3-K4-specific	GO:0034721	KDM5A|1.83	1	3	0.0936
Histone H3-K4 trimethylation	GO:0080182	ZNF335|1.72	1	12	0.806
Histone H3-K9 methylation	GO:0051567	SETD7|1.52; ATRX|1.62; BRCA1|1.78; RIF1|1.99; PRDM5|3.29	5	24	0.084
Histone lysine demethylation	GO:0070076	KDM3A|1.57; KDM1A|1.59; KDM4A|1.64; KDM5A|1.83; KDM2A|1.89	5	23	0.0862
Internal peptidyl-lysine acetylation	GO:0018393	RPS6KA5|1.50; Gga.4095|1.52; TADA2A|1.55; NCOA1|1.55; BRPF3|1.56; EP300|1.56; MEAF6|1.56; MSL1|1.59; KANSL1|1.59; KANSL3|1.60; EP400|1.61; TAF5L|1.63; NOC2L|1.63; DMAP1|1.64; MYST2|1.64;Gga.55346|1.67; YEATS2|1.68; TRRAP|1.69; SPI1|1.70; ING4|1.73;	28	149	0.0226
		CREBBP|1.75; SIN3A|1.76; TAF7|1.76; BRCA1|1.78; TAF6L|1.83;MBD3|1.89; IWS1|1.98; ING5|2.01
Histone H4-K8 acetylation	GO:0043982	MEAF6|1.56; KANSL1|1.59; KANSL3|1.60; MYST2|1.64; ING4|1.73	5	13	0.018
Histone acetylation	GO:0016573	RPS6KA5|1.50; Gga.4095|1.52; TADA2A|1.55; NCOA1|1.55; BRPF3|1.56; EP300|1.56; MEAF6|1.56; MSL1|1.59; KANSL1|1.59; KANSL3|1.60;EP400|1.61;TAF5L|1.63; NOC2L|1.63; DMAP1|1.64; MYST2|1.64;Gga.55346|1.67; YEATS2|1.68; TRRAP|1.689; SPI1|1.70; ING4|1.73;	28	149	0.0226
		CREBBP|1.75; SIN3A|1.76; TAF7|1.76; BRCA1|1.78; TAF6L|1.83;MBD3|1.89; IWS1|1.98; ING5|2.01
Histone H4 acetylation	GO:0043967	EP300|1.56; MEAF6|1.56; MSL1|1.59; KANSL1|1.59; KANSL3|1.60; EP400|1.61; DMAP1|1.64; MYST2|1.64; TRRAP|1.68; SPI1|1.70;ING4|1.73; BRCA1|1.78; IWS1|1.98	13	60	0.0373
Histone H4-K12 acetylation	GO:0043983	MEAF6|1.56; MYST2|1.64; ING4|1.73	3	8	0.061
mRNA transcription from RNA polymerase II promoter	GO:0042789	MED1|1.56; LMO2|1.62; SUPT6H|1.70; STAT3|2.08	4	11	0.0417
Histone monoubiquitination	GO:0010390	TRIM37|1.52; DDB2|1.53; DDB1|1.60; UHRF1|1.70; PAF1|1.78; LEO1|1.79	6	22	0.0527
